# Supplementary material
Source: PubMed Central journal article supplement (PMC7953427)
Supplement: NIHMS1676101-supplement-supplementary_material.pdf [file NIHMS1676101-supplement-supplementary_material.pdf]

## Nicotinamide riboside-amino acid conjugates that are stable to purine nucleoside phosphorylase

Faisal Hayat and Marie E. Migaud\*

Mitchell Cancer Institute, University of South Alabama, 1660 Springhill Ave., Mobile, AL 36604, USA

### Supplementary

1. Copies of  $^1\text{H}$  NMR,  $^{13}\text{C}$  NMR,  $^{19}\text{F}$ -NMR and HRMS Spectra.....2-58
2. Enzymatic assays by  $^1\text{H}$  NMR.....59-61
3. Table of Vorbrüggen reaction outcomes.....62

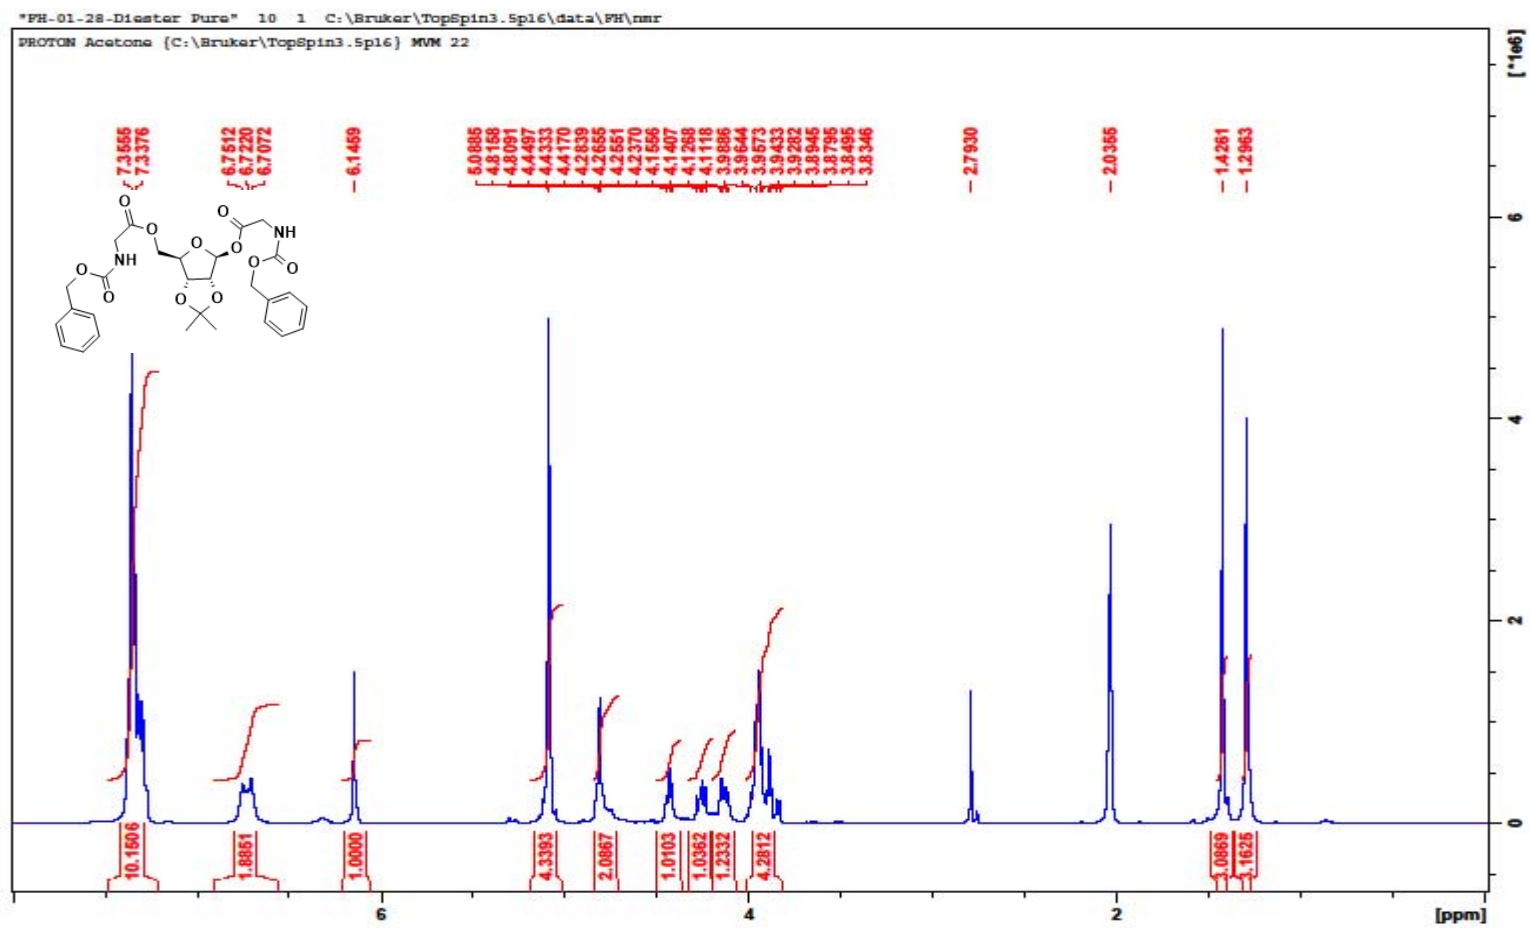

Compound 4. 400 MHz <sup>1</sup>H NMR spectrum in Acetone-*d*<sub>6</sub>

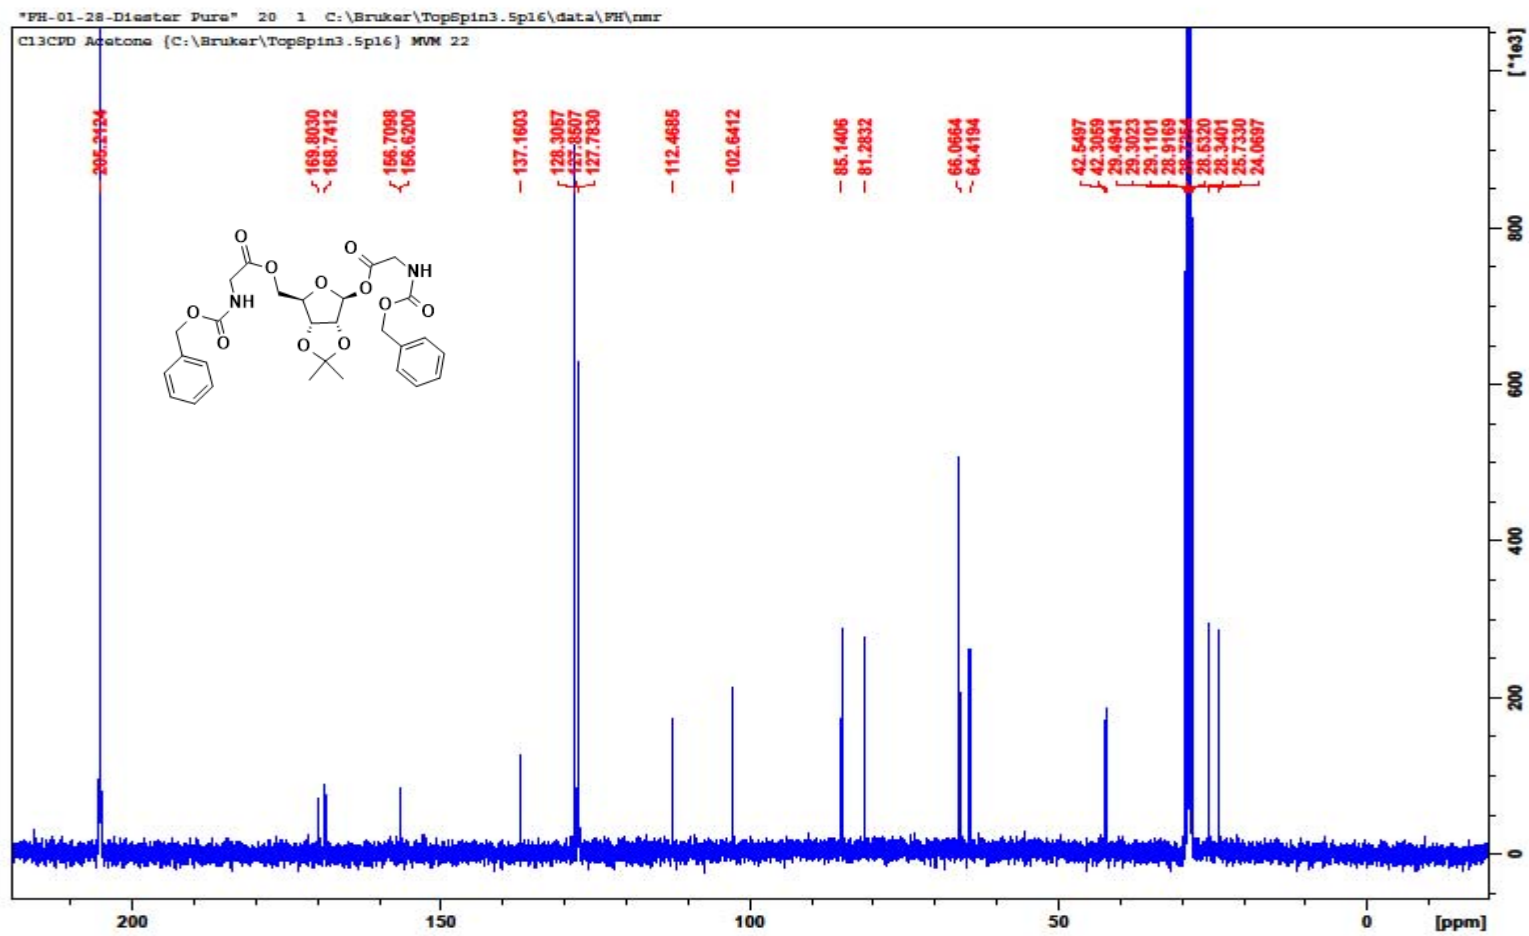

Compound 4. 100 MHz  $^{13}\text{C}$  NMR spectrum in Acetone- $d_6$

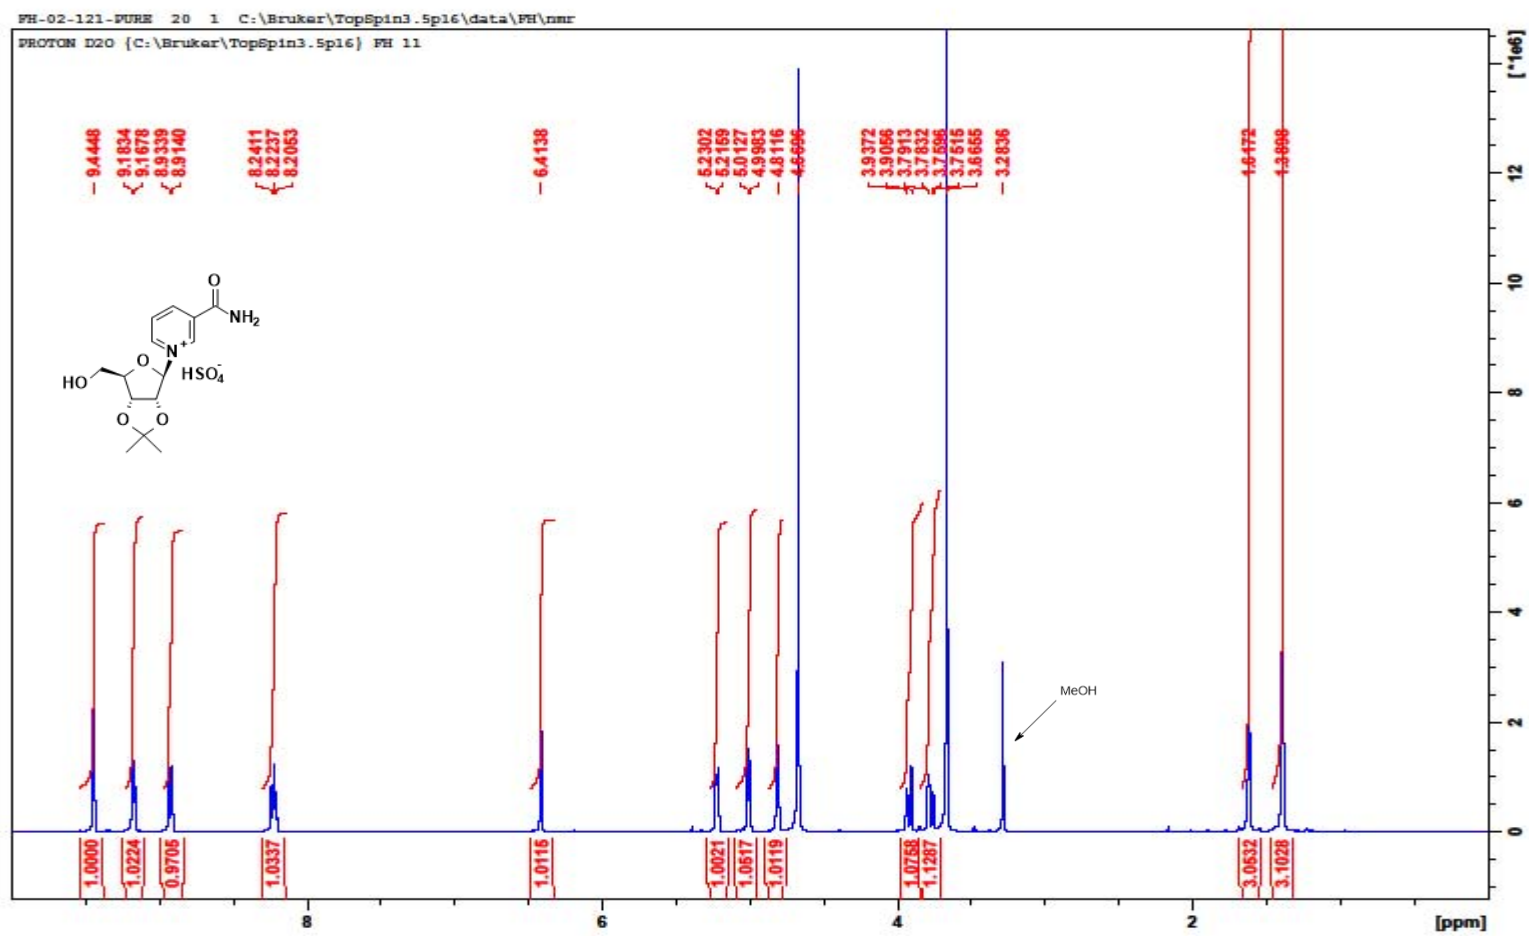

Compound 7. 400 MHz <sup>1</sup>H NMR spectrum in D<sub>2</sub>O

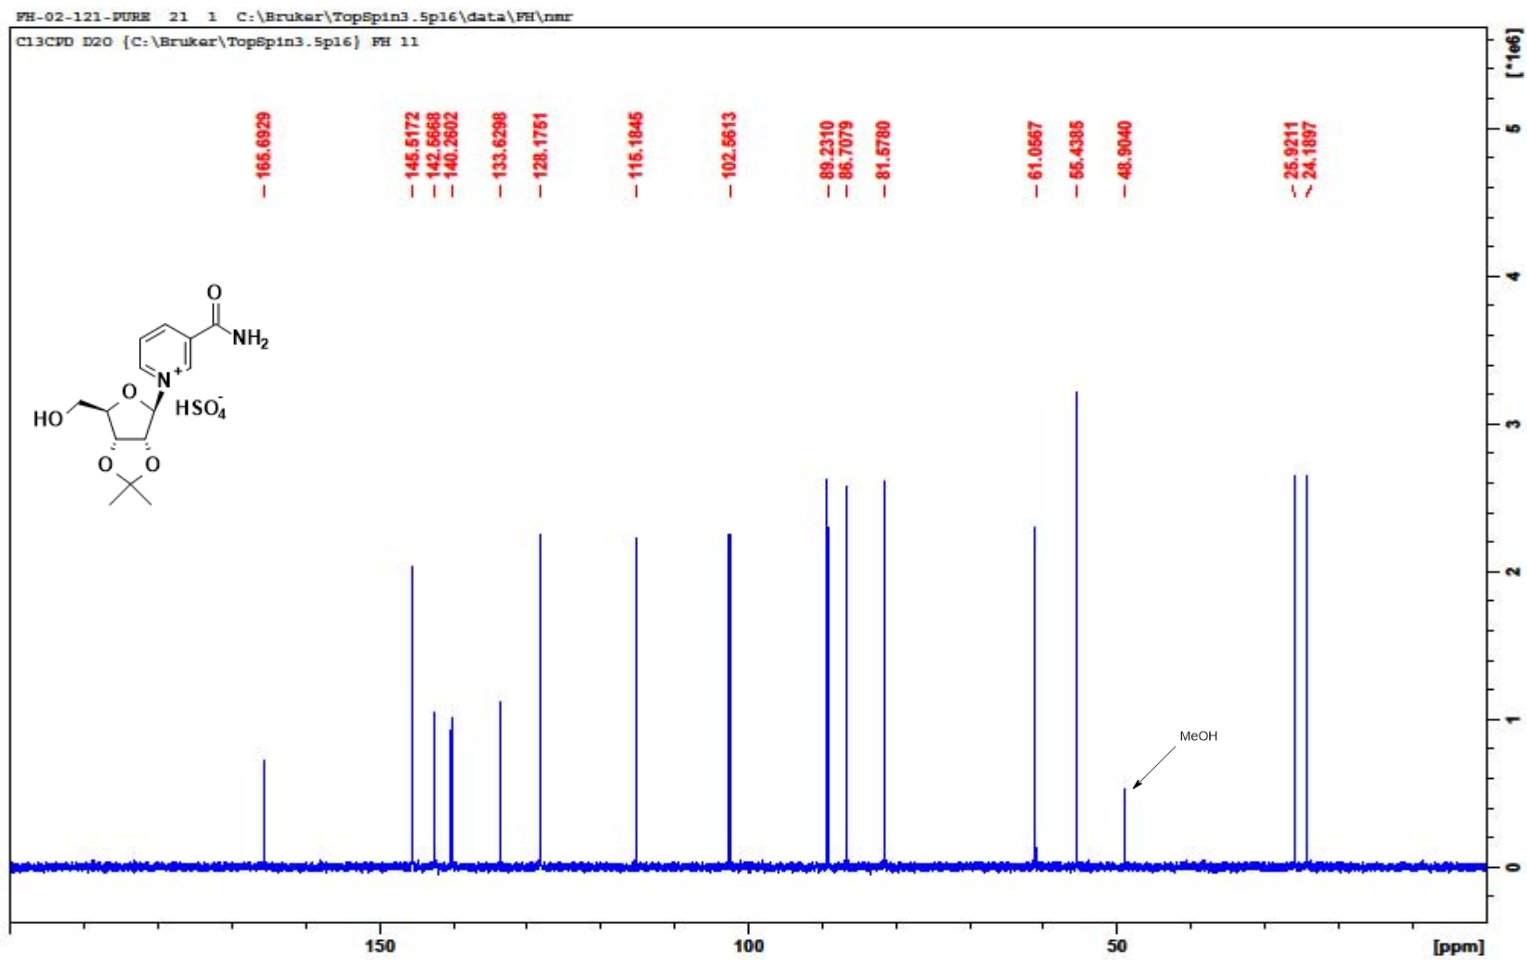

Compound 7. 100 MHz  $^{13}\text{C}$  NMR spectrum in  $\text{D}_2\text{O}$

mm\_072018\_fh\_01\_20\_1 #242-260 RT: 3.83-4.11 AV: 19 NL: 5.55E6

F: FTMS + p ESI Full ms [120.00-800.00]

123.05448  
R=118611

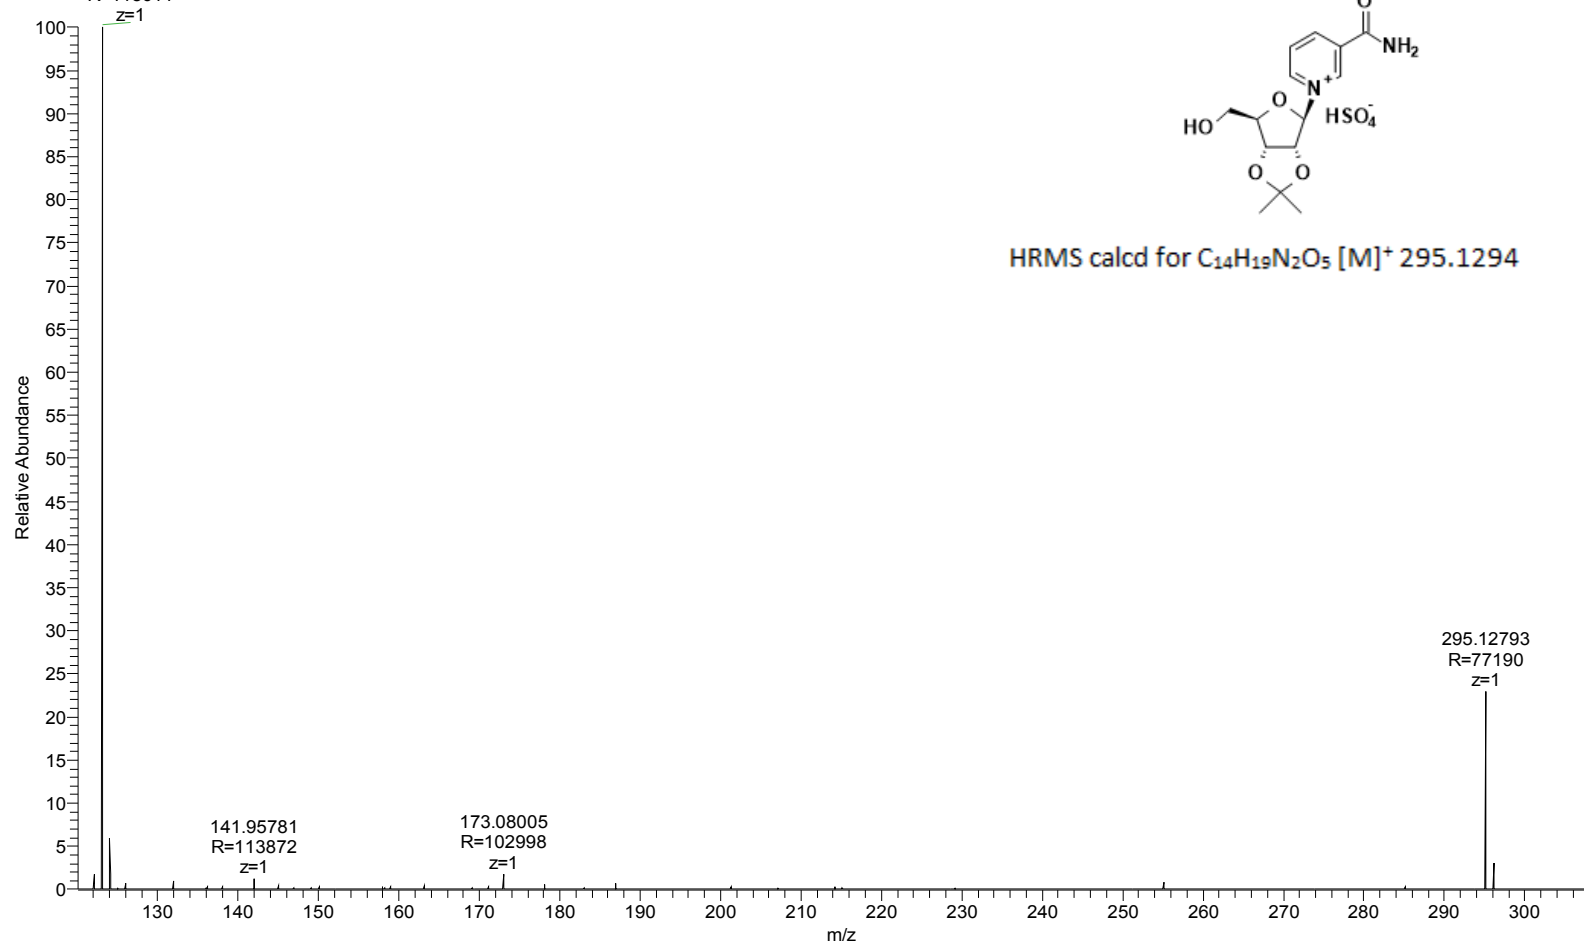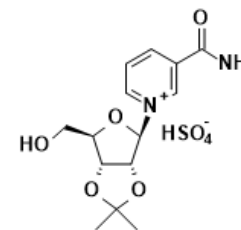

HRMS calcd for C<sub>14</sub>H<sub>19</sub>N<sub>2</sub>O<sub>5</sub> [M]<sup>+</sup> 295.1294

Compound 7. HRMS spectra

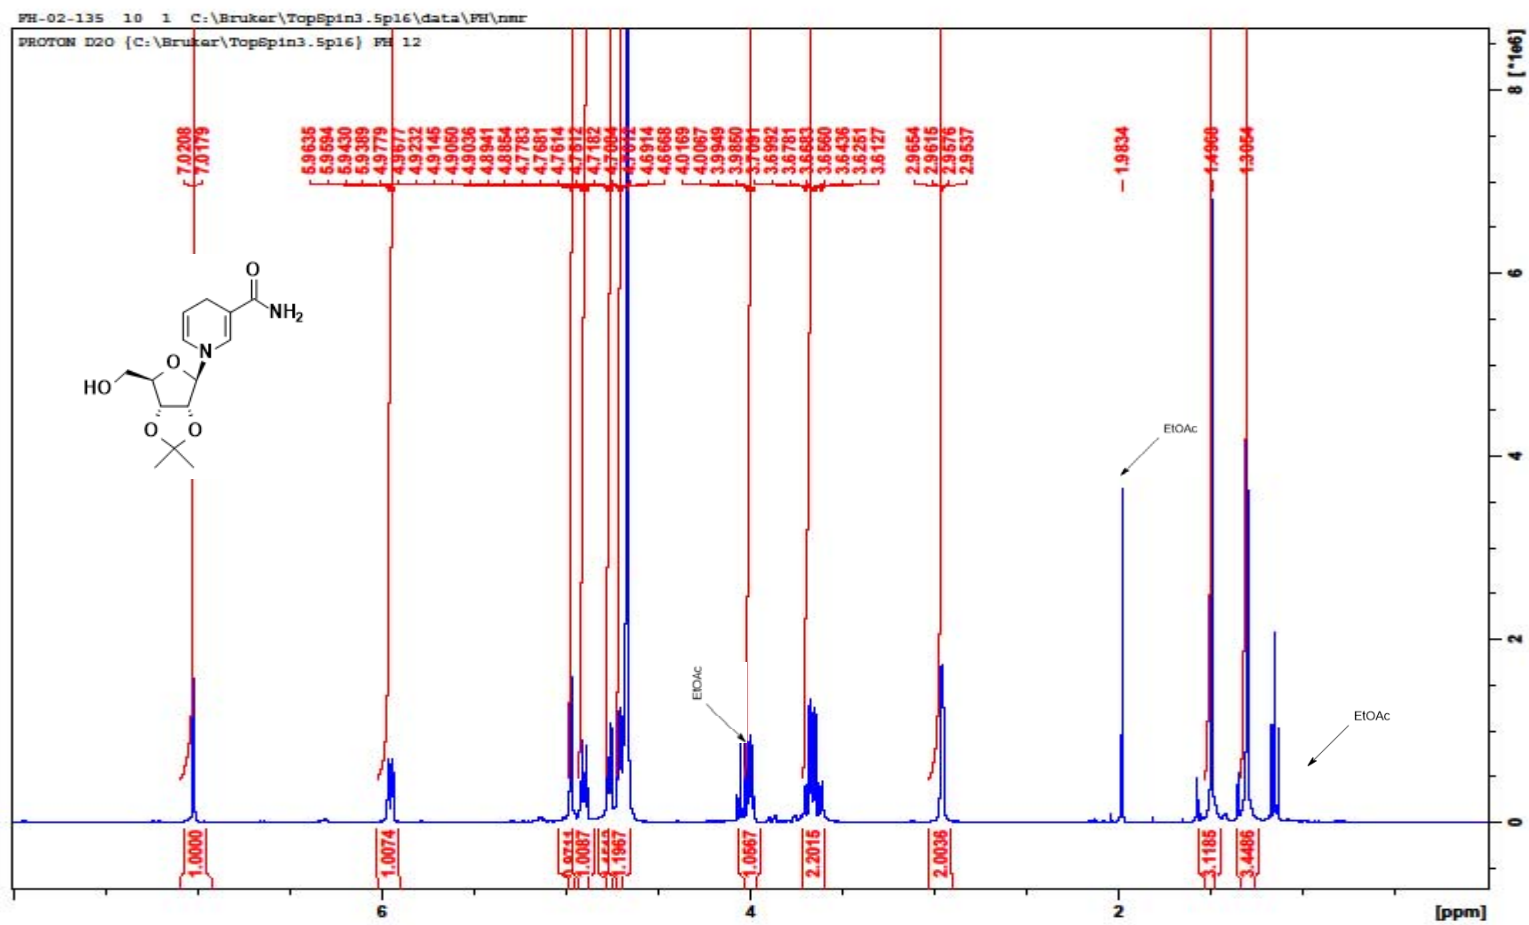

Compound 8. 400 MHz <sup>1</sup>H NMR spectrum in D<sub>2</sub>O

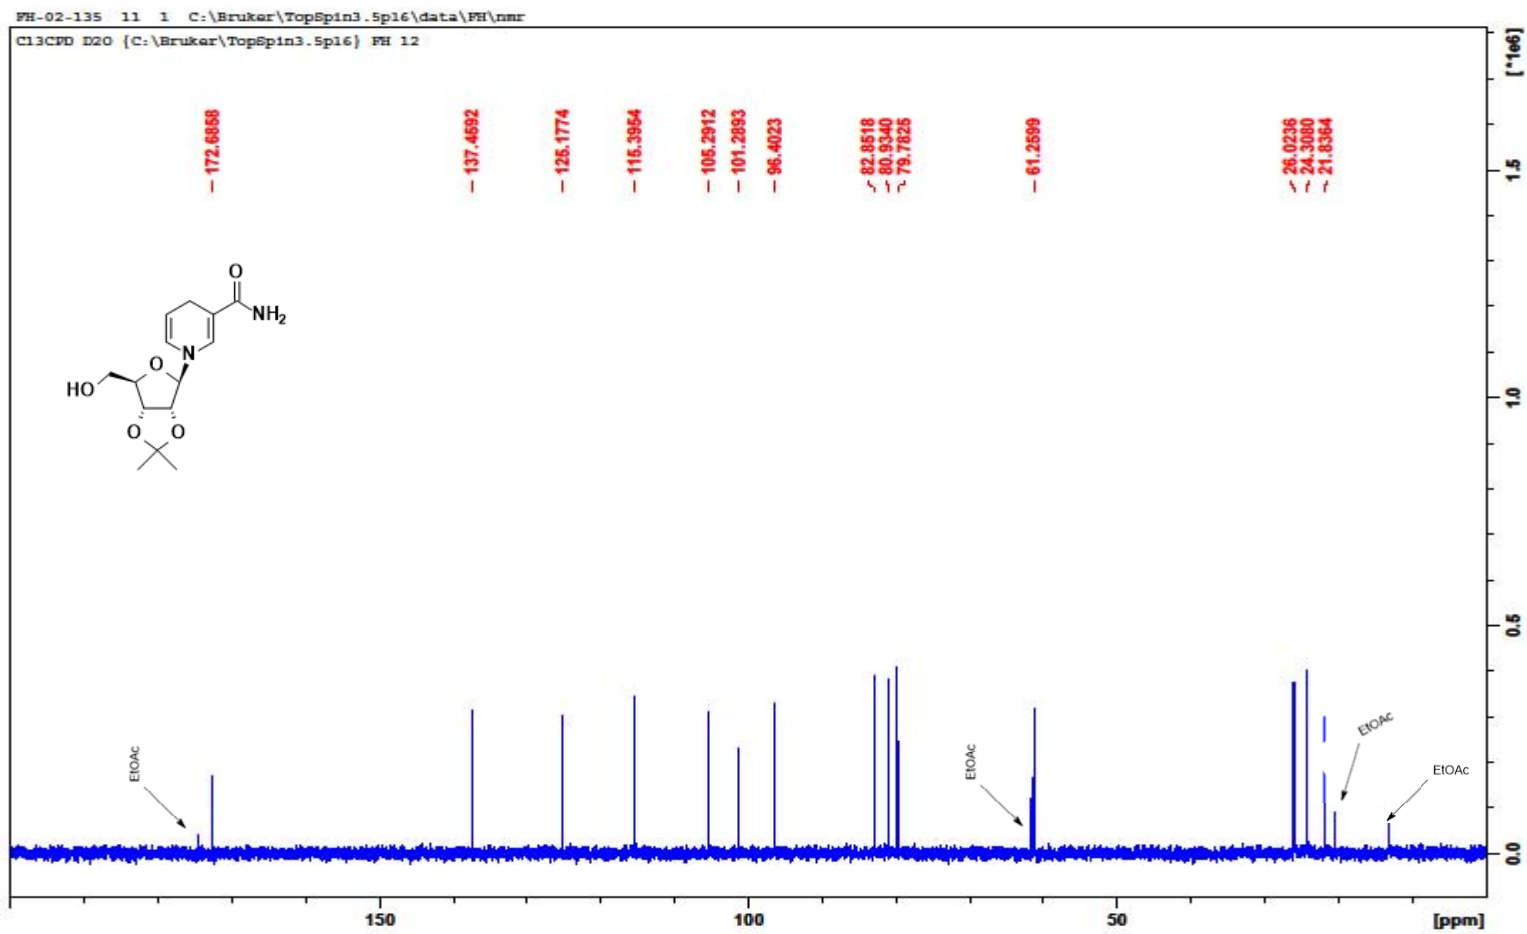

Compound 8. 100 MHz <sup>13</sup>C NMR spectrum in D<sub>2</sub>O



mm\_072018\_fh\_01\_22\_1#244-267 RT: 3.86-4.21 AV: 24 NL: 5.74E6  
F: FTMS + p ESI Full ms [120.00-800.00]

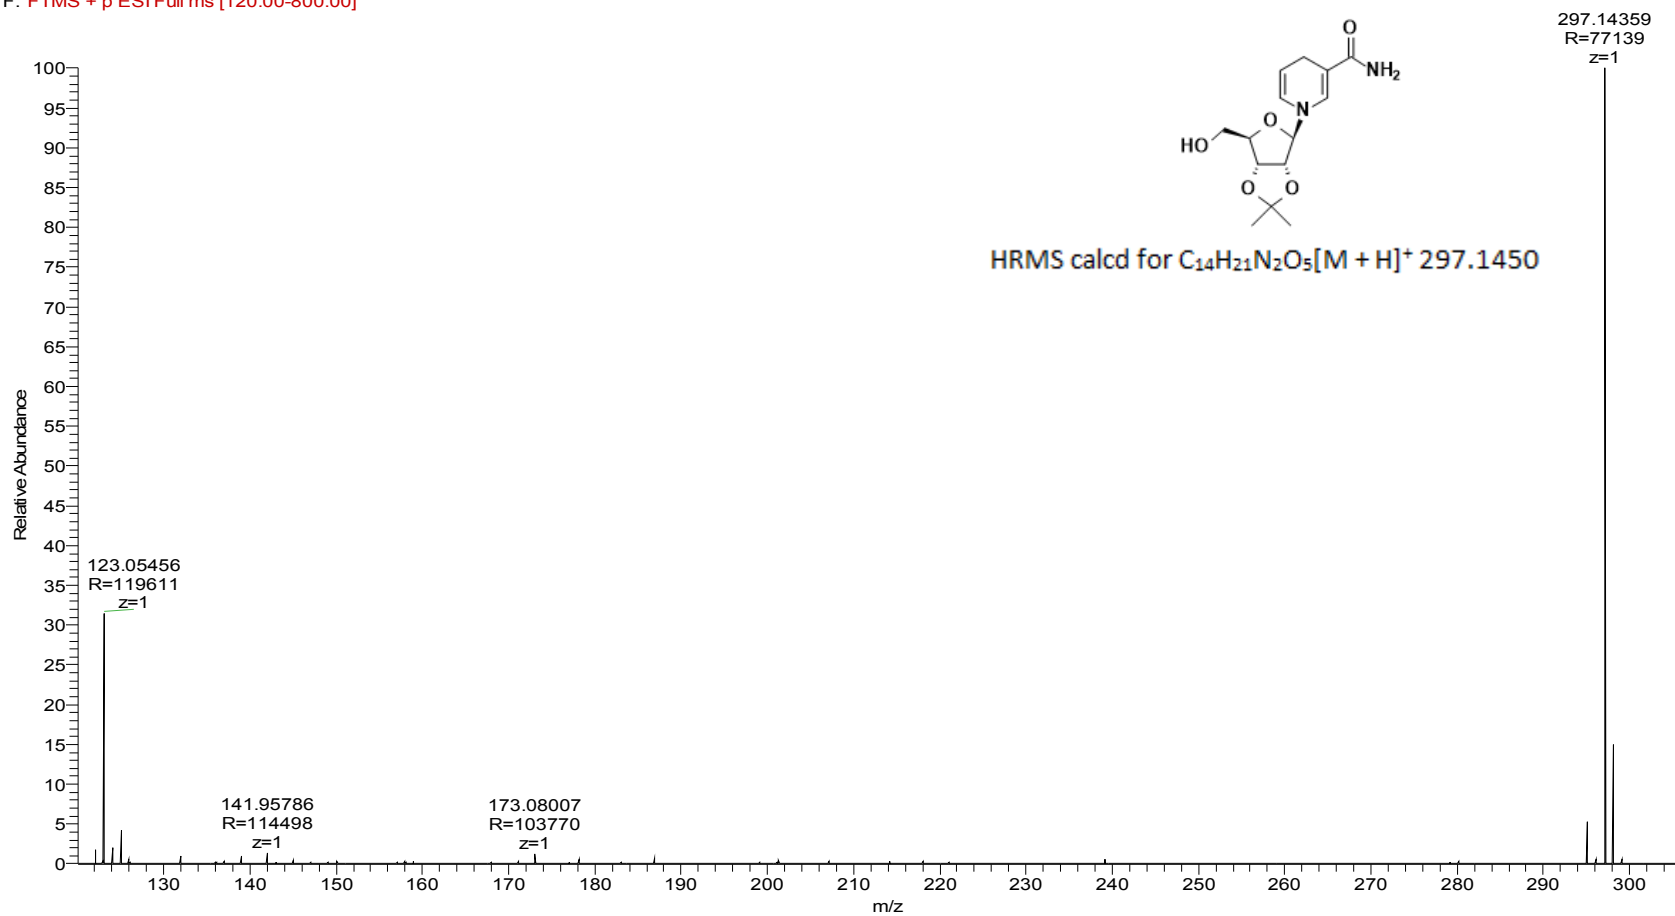

Compound 8. HRMS spectra

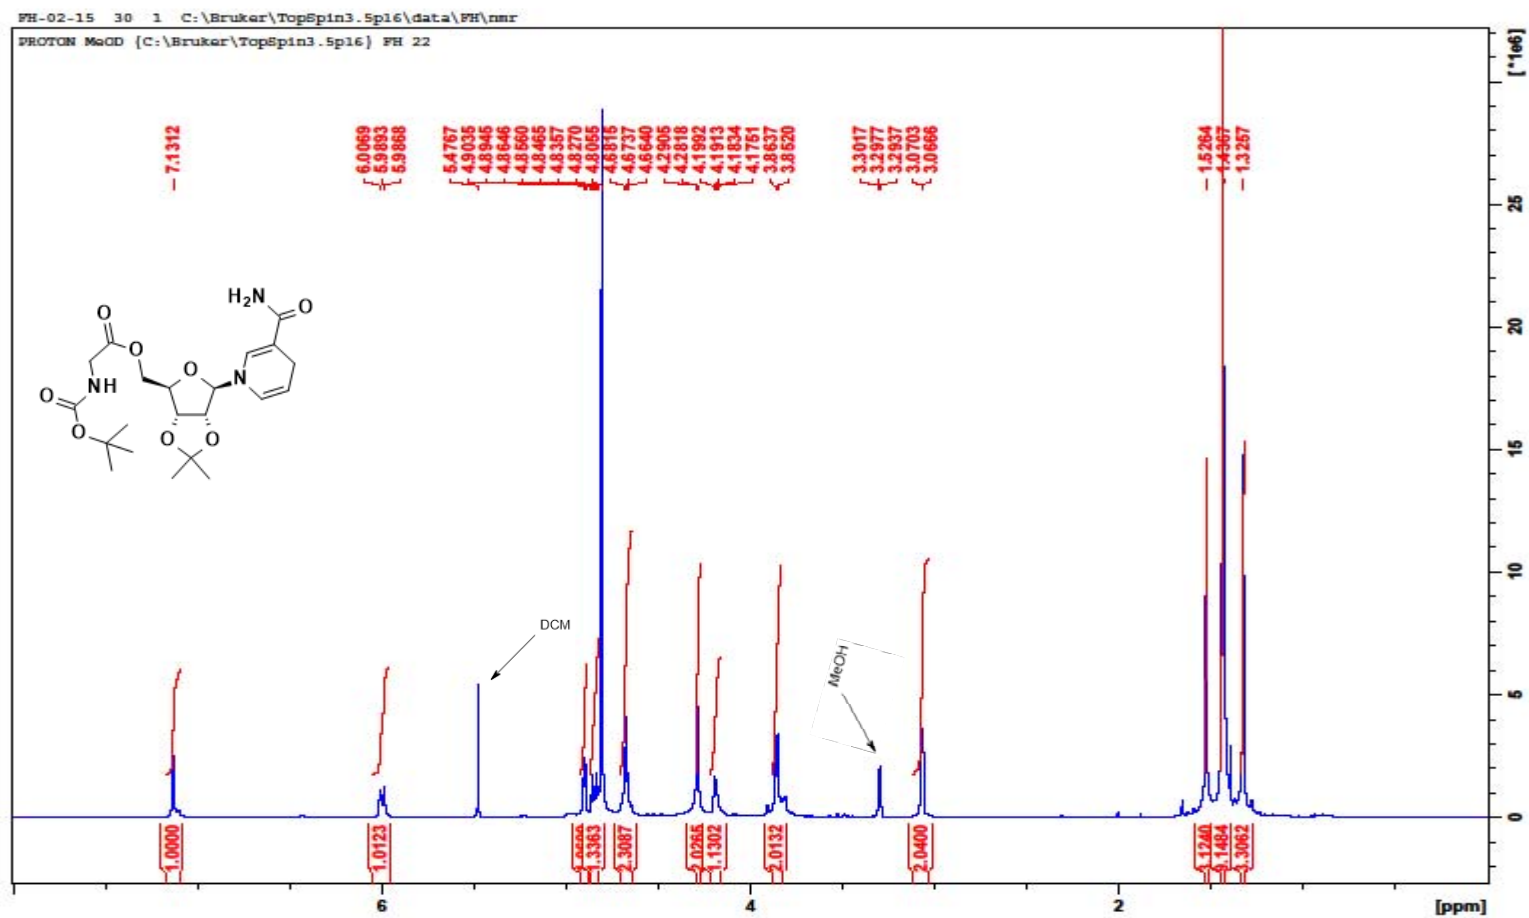

Compound 10a. 400 MHz  $^1\text{H}$  NMR spectrum in MeOD

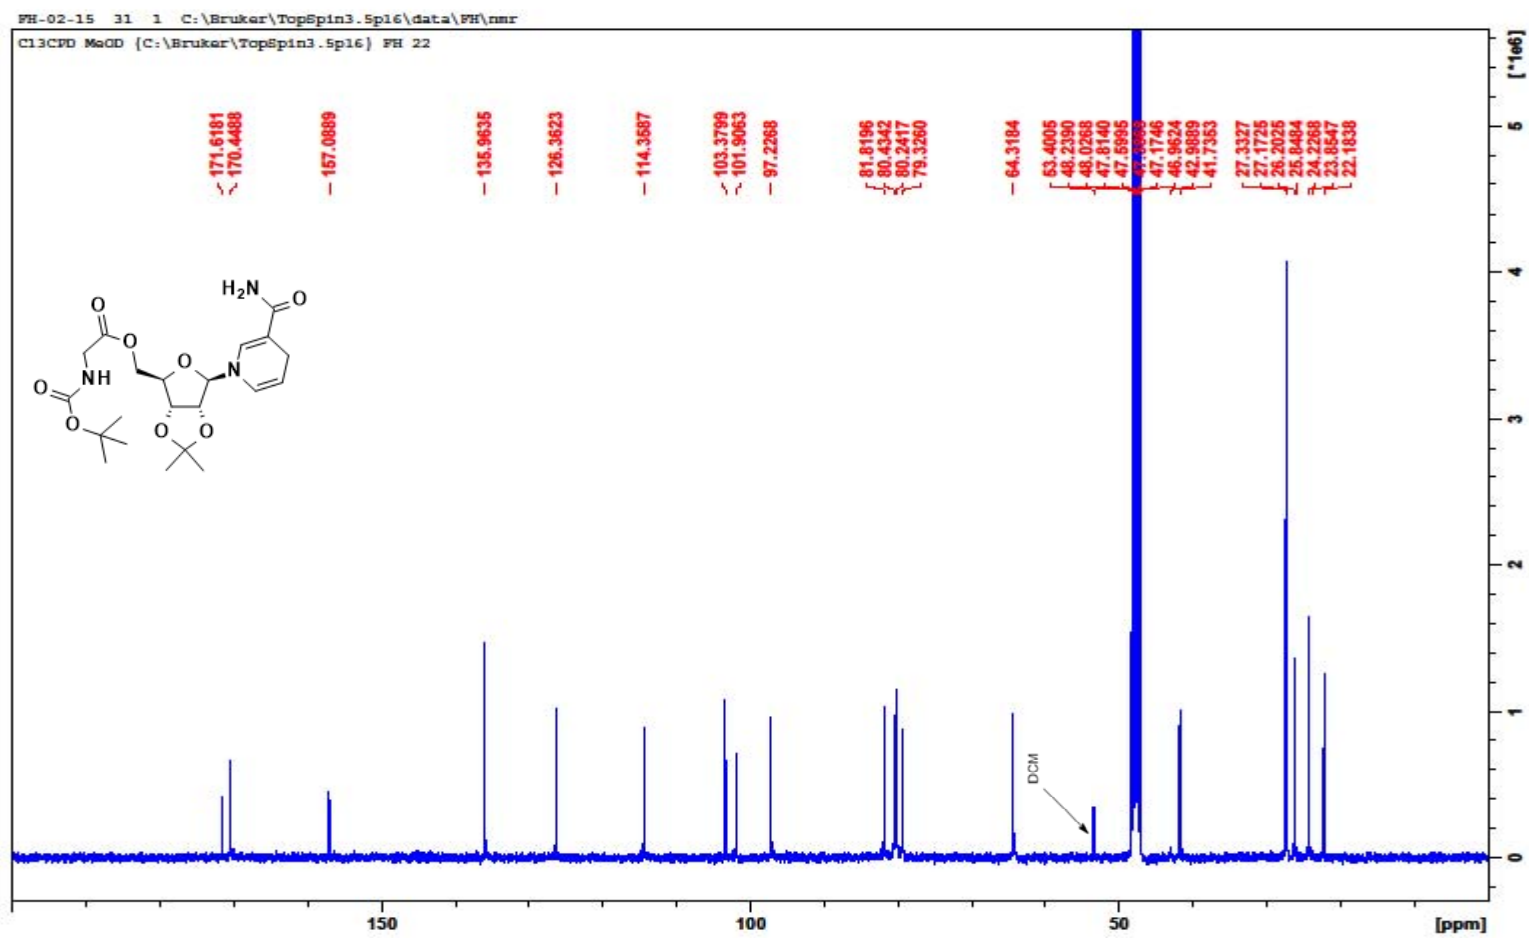

Compound 10a. 100 MHz  $^{13}\text{C}$  NMR spectrum in MeOD

mm\_101618\_nrh\_glycine\_01 #17-31 RT: 0.25-0.46 AV: 15 SB: 81 5.79-7.06 NL: 1.49E7

F: FTMS + p ESI Full ms [200.00-1050.00]

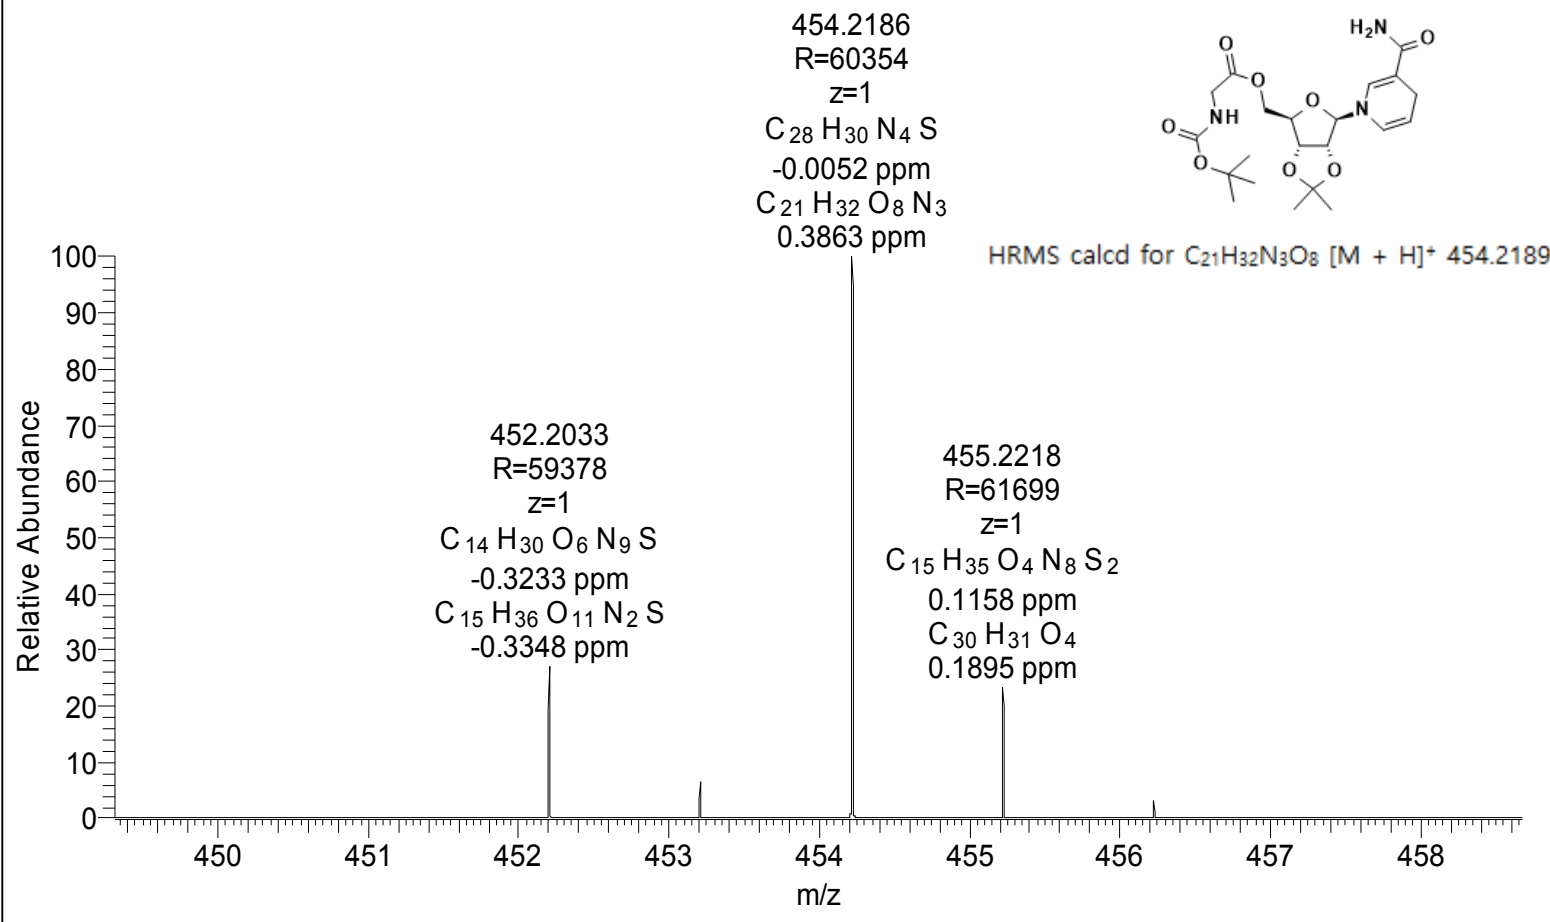

Compound 10a. HRMS spectra

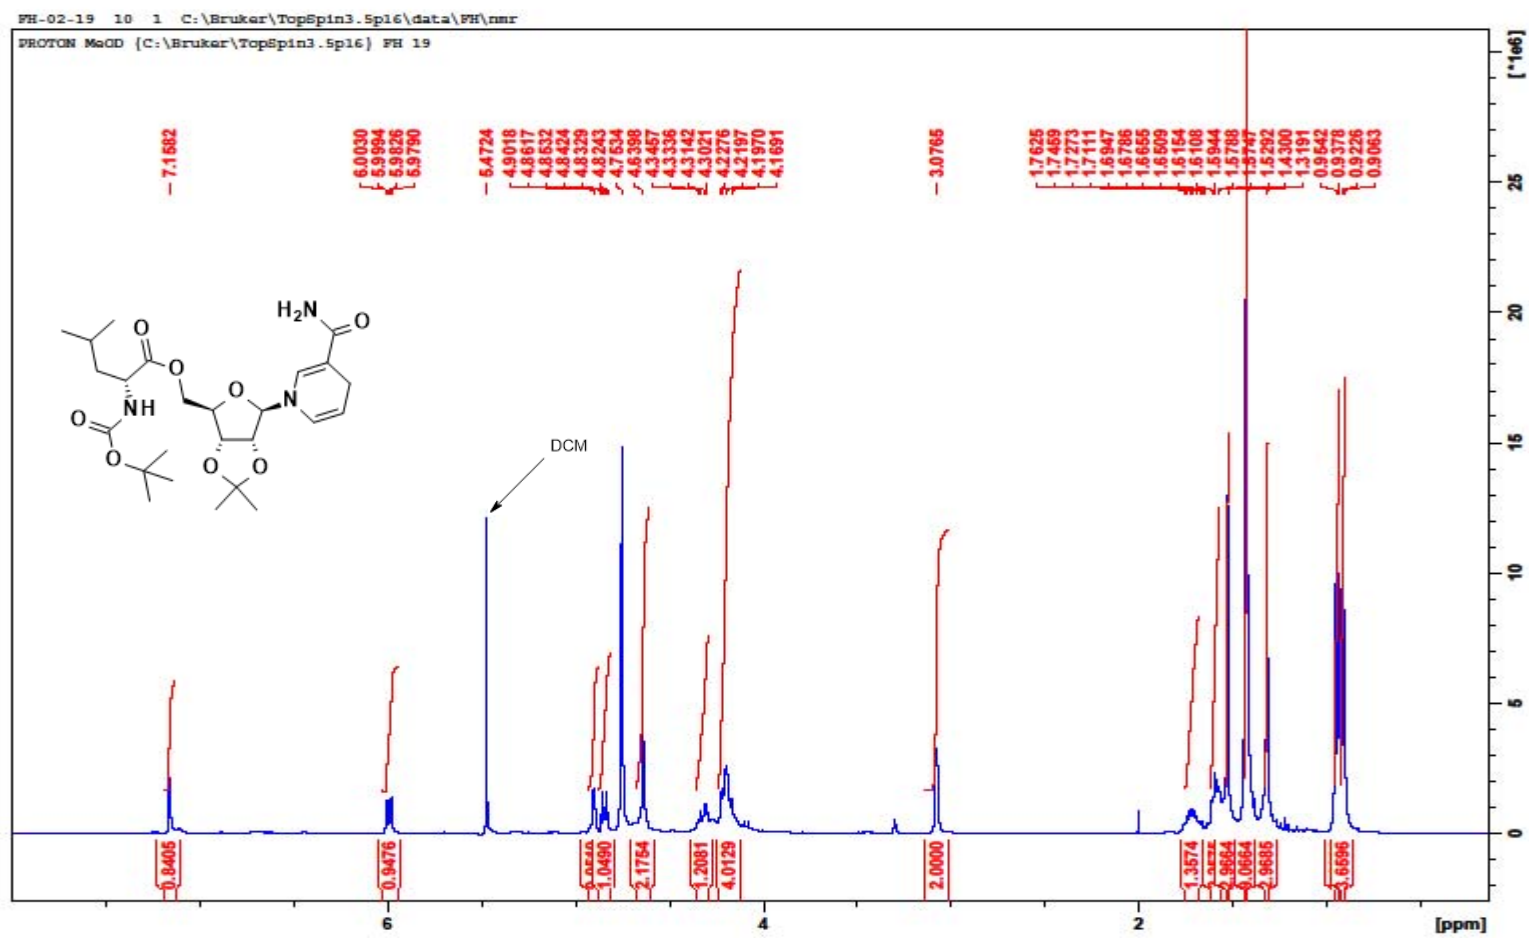

Compound 10b. 400 MHz  $^1\text{H}$  NMR spectrum in MeOD

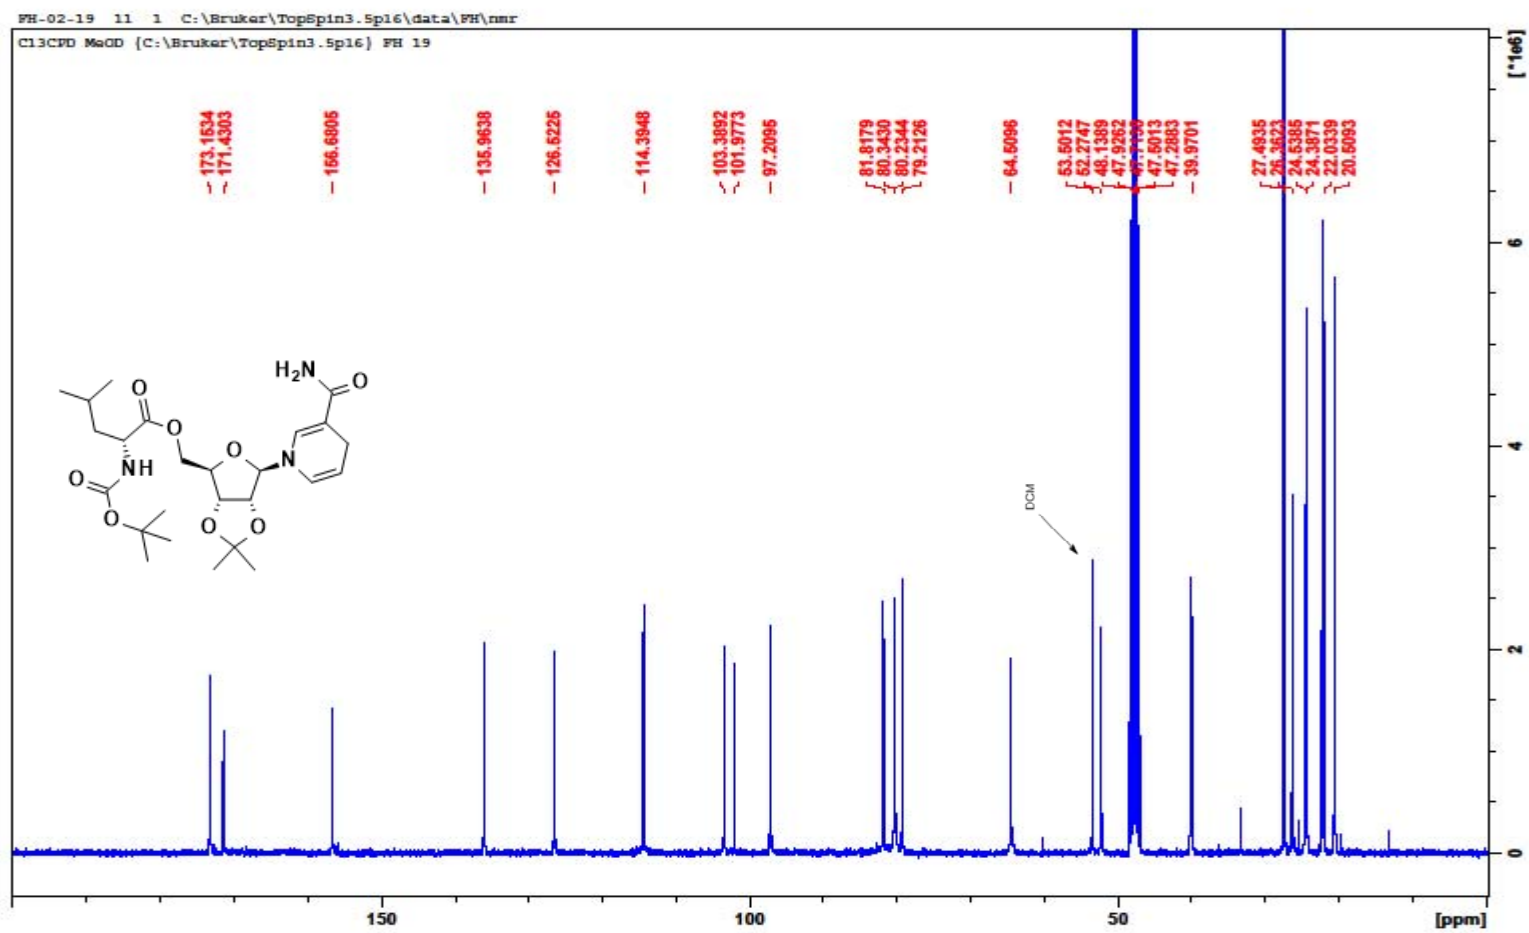

Compound 10b. 100 MHz  $^{13}\text{C}$  NMR spectrum in MeOD

mm\_101618\_nrh\_leucine\_01 #17-32 RT: 0.25-0.47 AV: 16 SB: 81 5.78-7.05 NL: 2.10E<sup>7</sup>

F: FTMS + p ESI Full ms [200.00-1050.00]

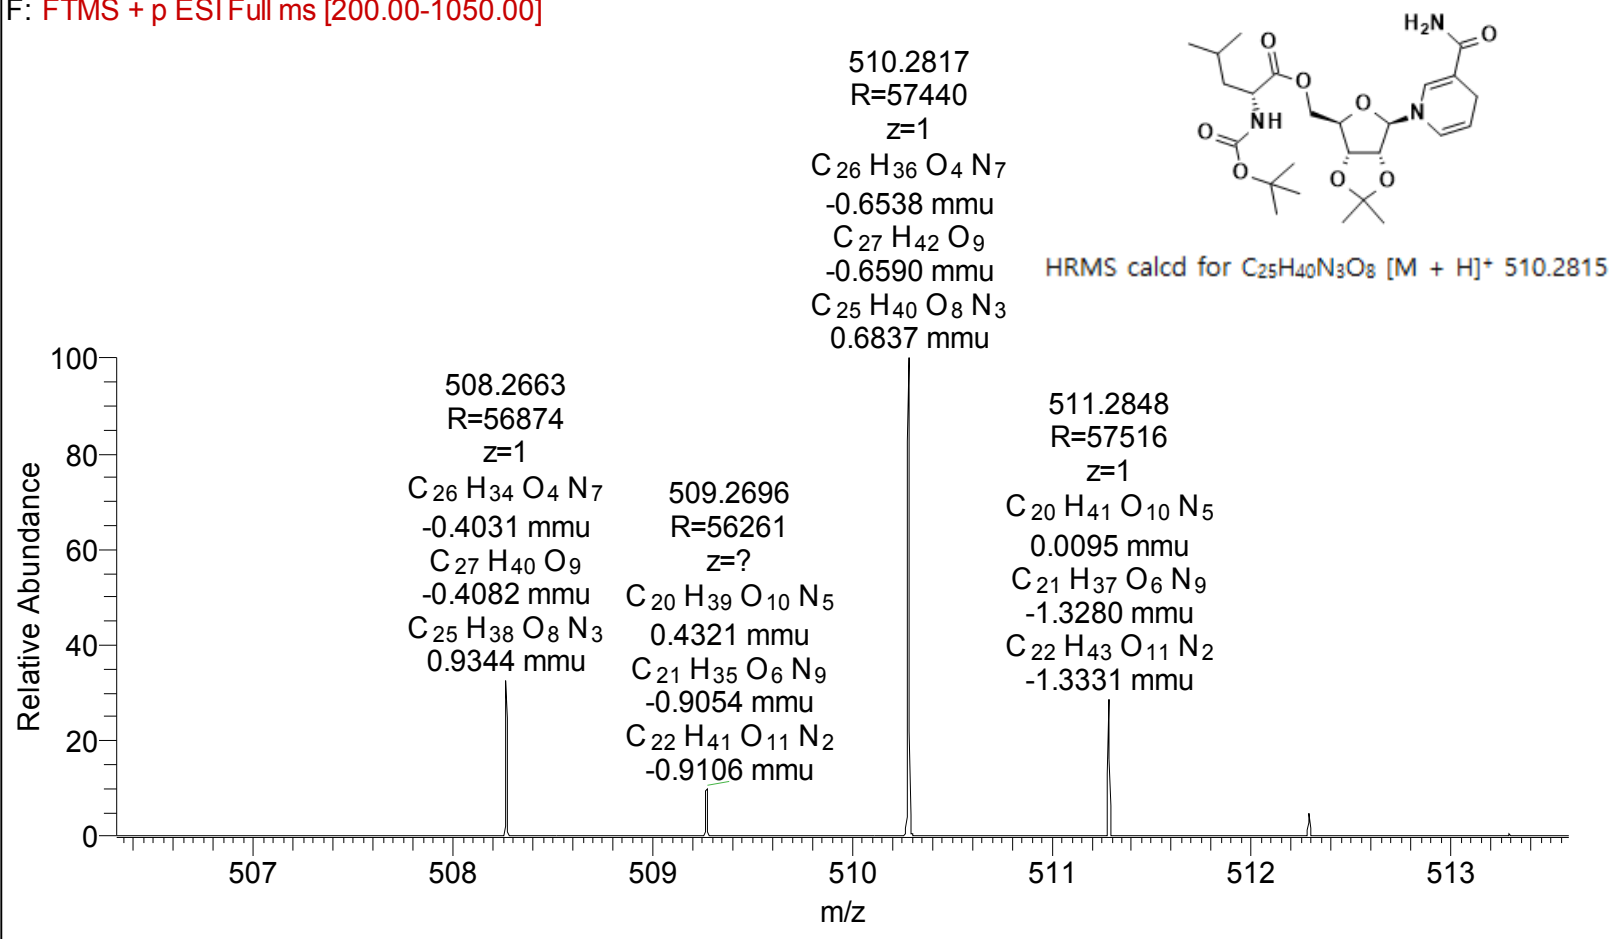

Compound 10b. HRMS spectra

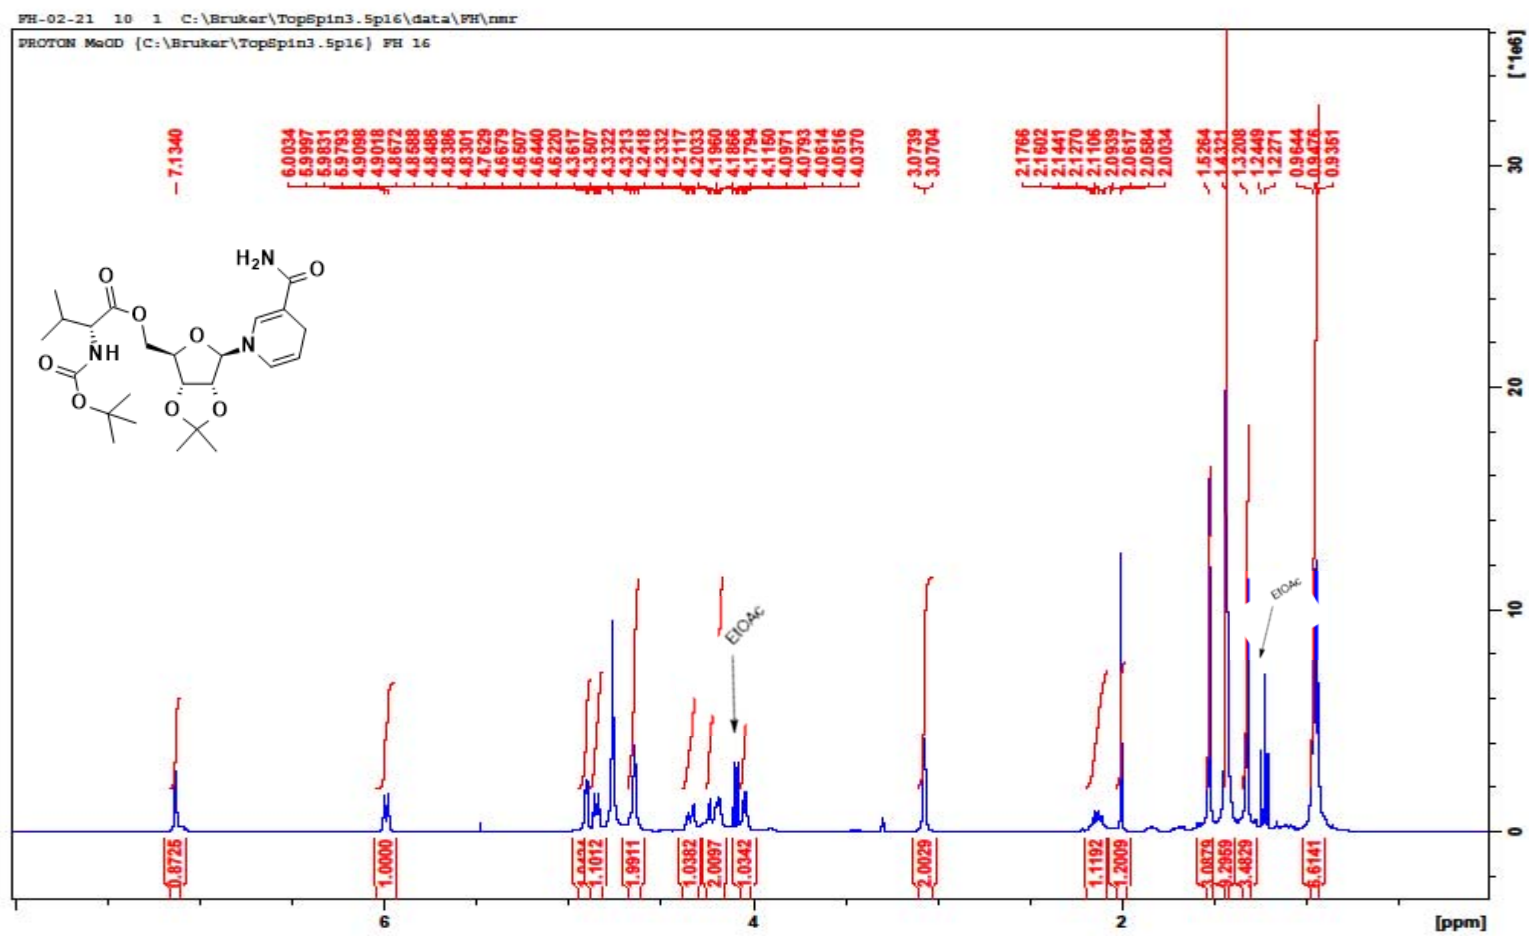

Compound 10c. 400 MHz <sup>1</sup>H NMR spectrum in MeOD



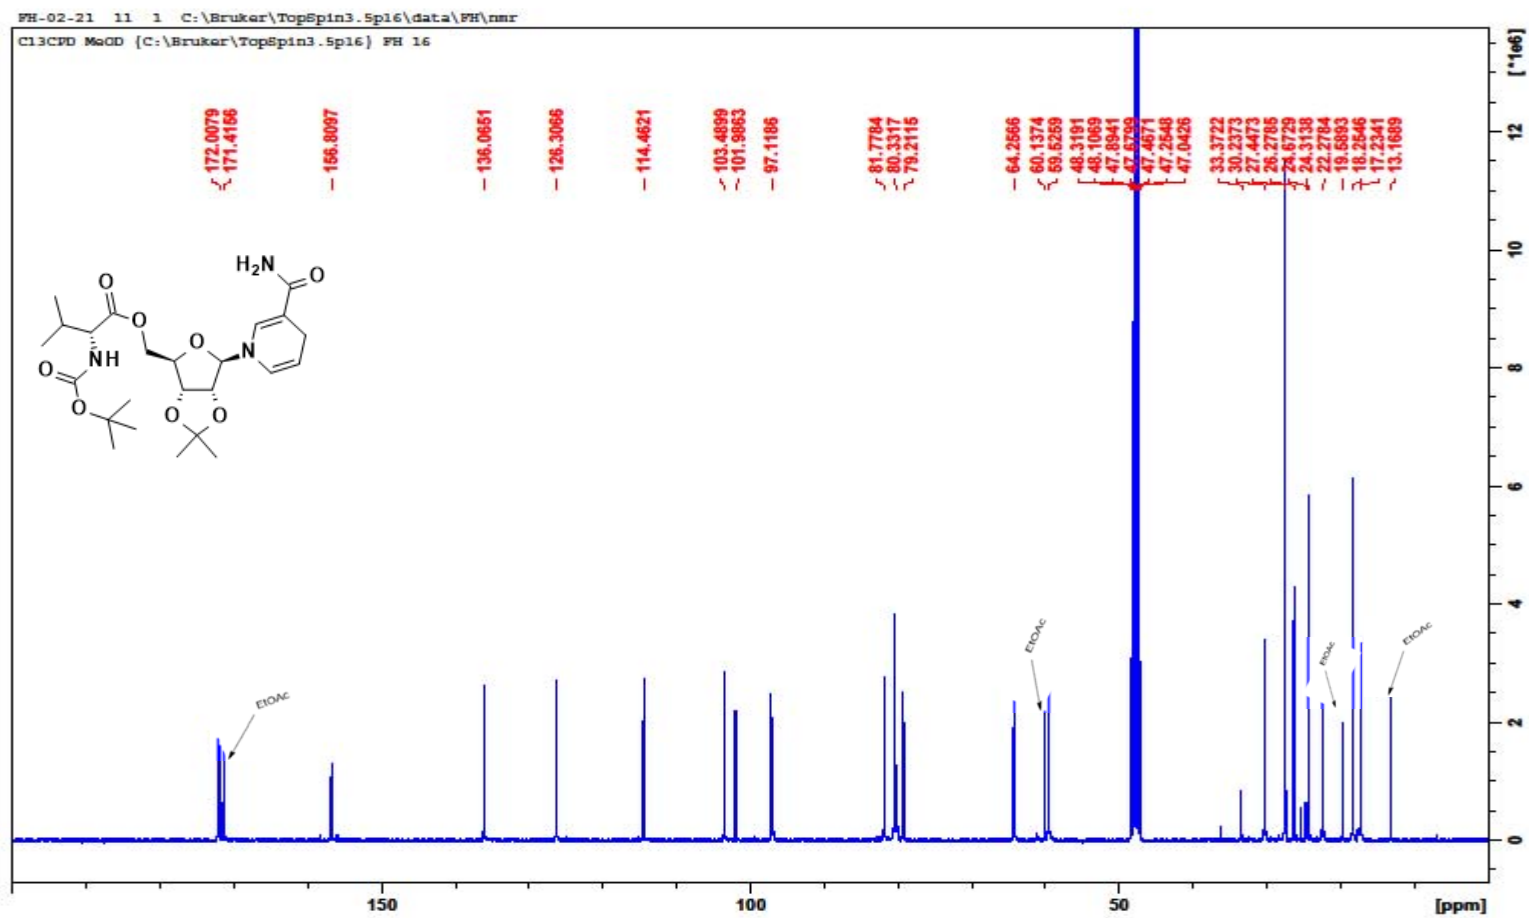

Compound 10c. 100 MHz  $^{13}\text{C}$  NMR spectrum in MeOD

mm\_101618\_nrh\_valine\_01 #16-30 RT: 0.23-0.44 AV: 15 SB: 81 5.78-7.06 NL: 1.51E7

F: FTMS + p ESI Full ms [200.00-1050.00]

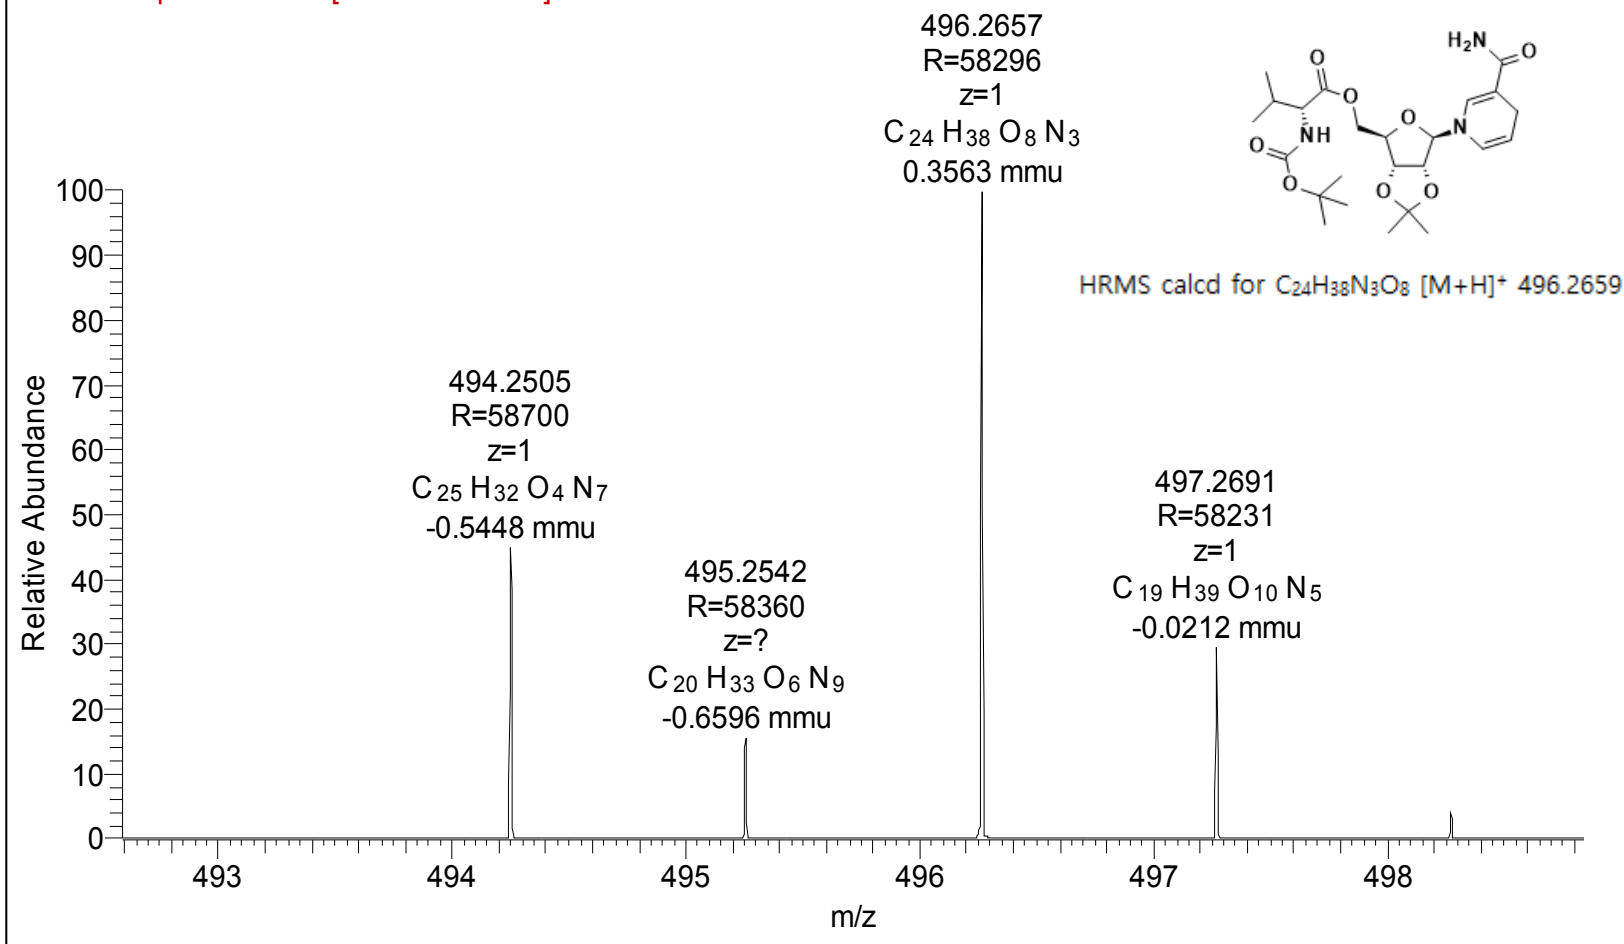

Compound 10c. HRMS spectra

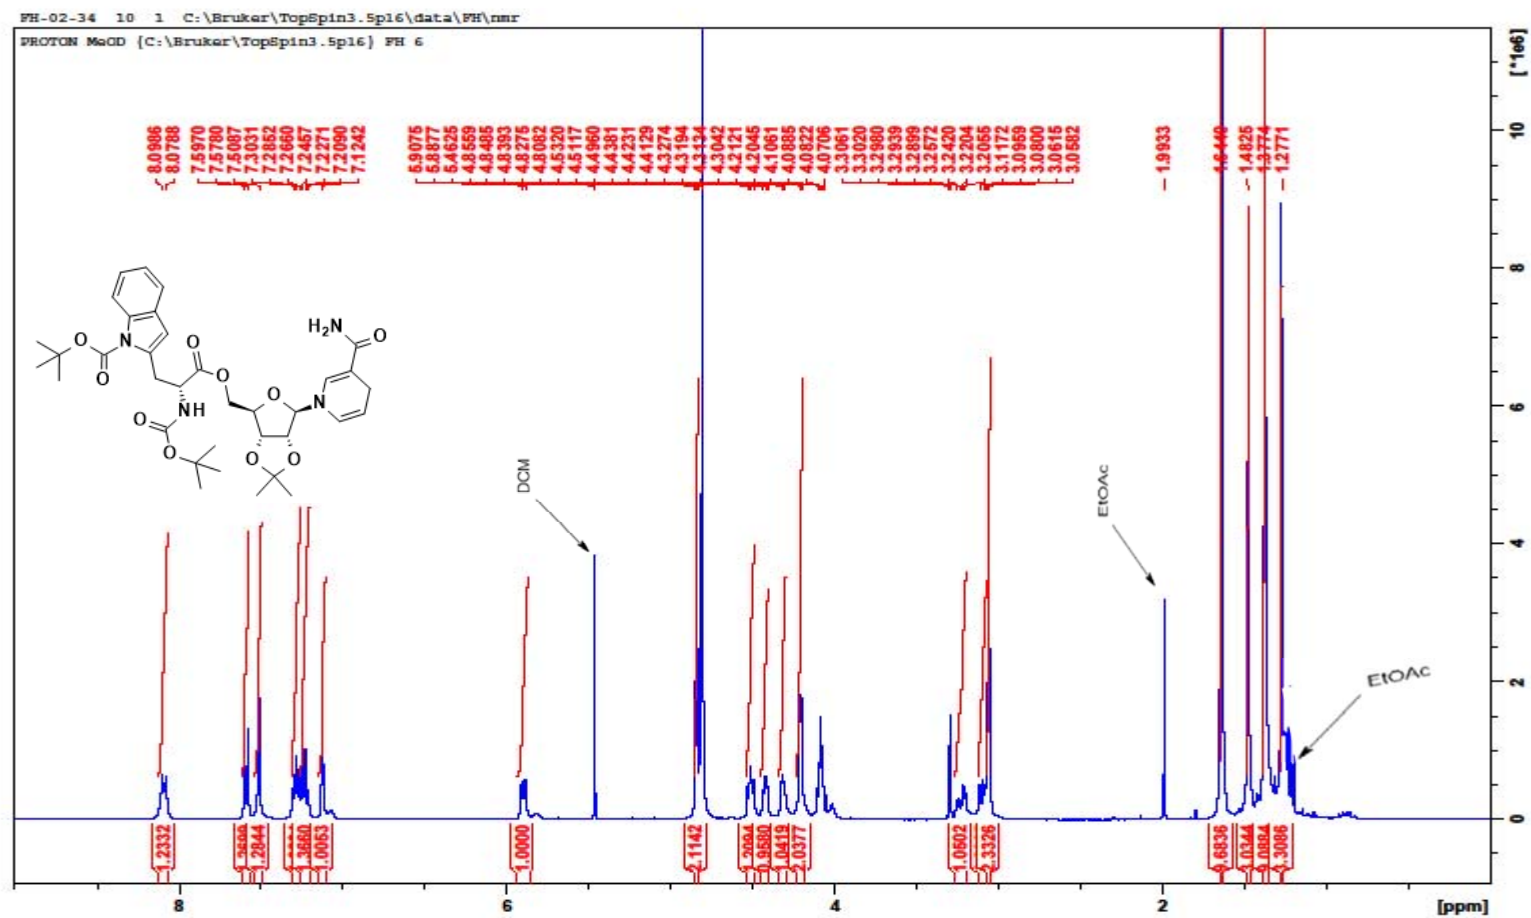

Compound 10d. 400 MHz  $^1\text{H}$  NMR spectrum in MeOD

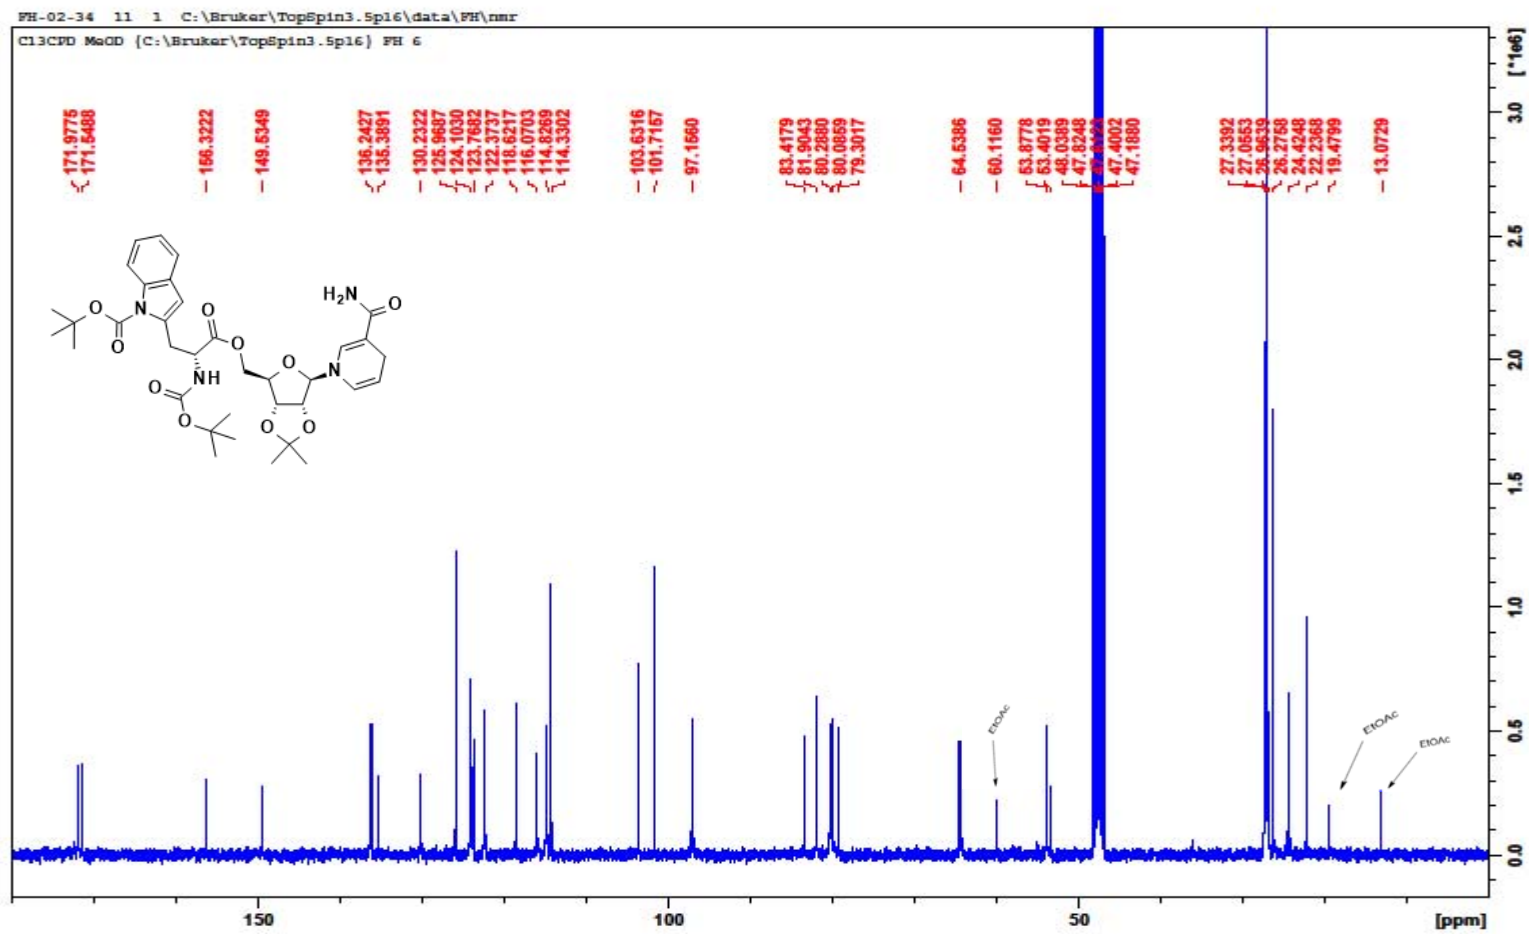

Compound 10d. 100 MHz <sup>13</sup>C NMR spectrum in MeOD

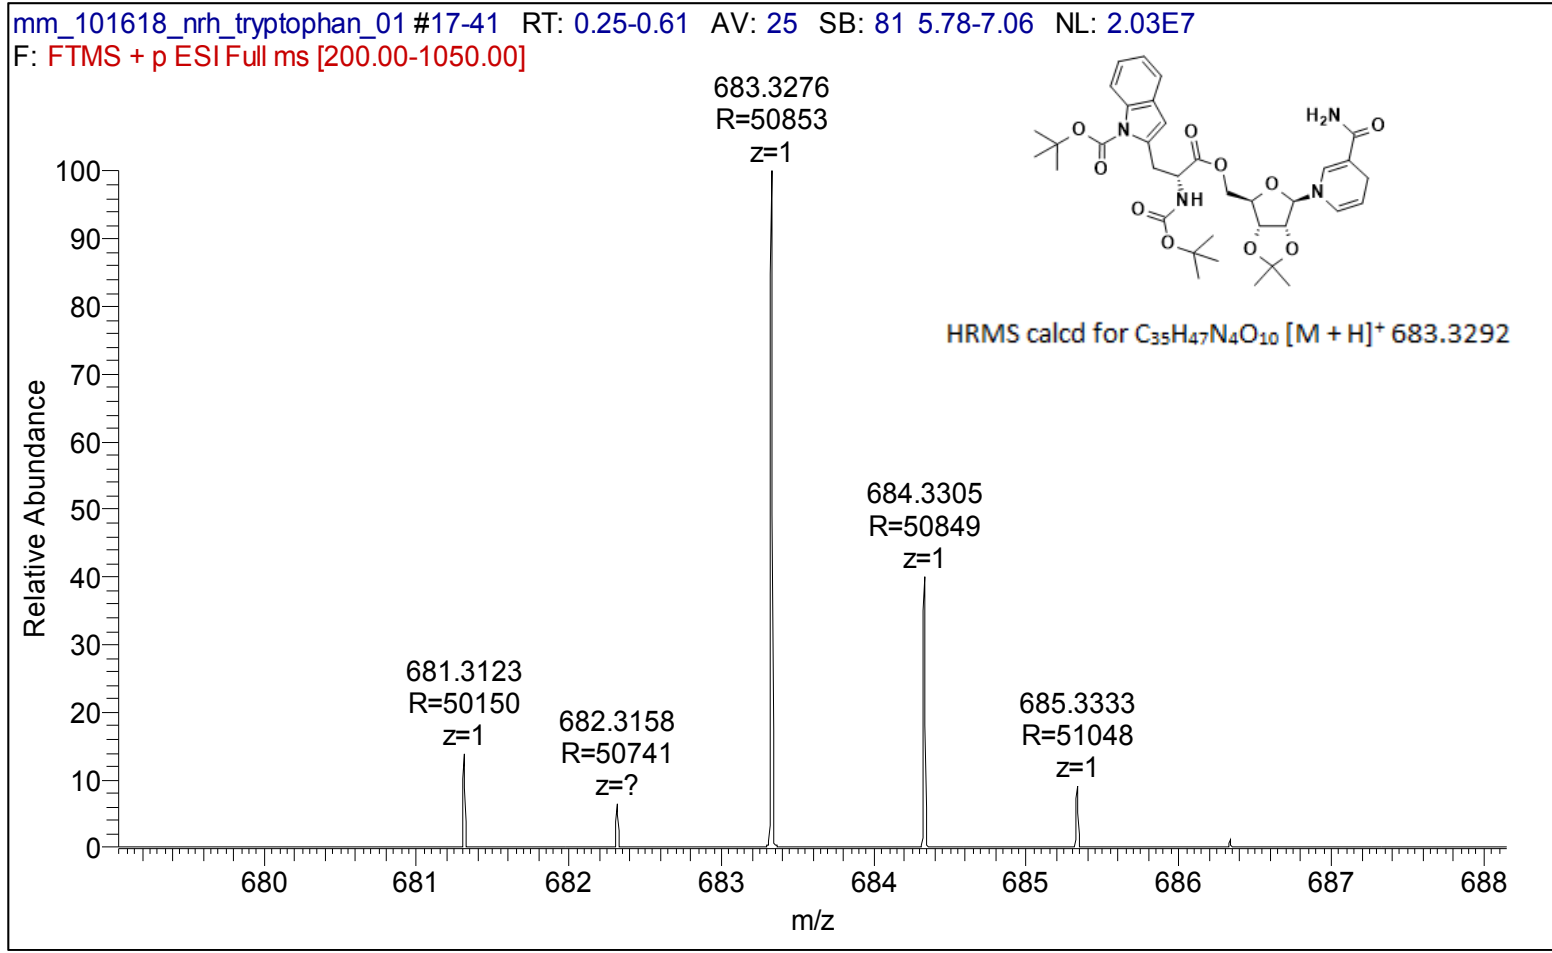

Compound 10d. HRMS spectra

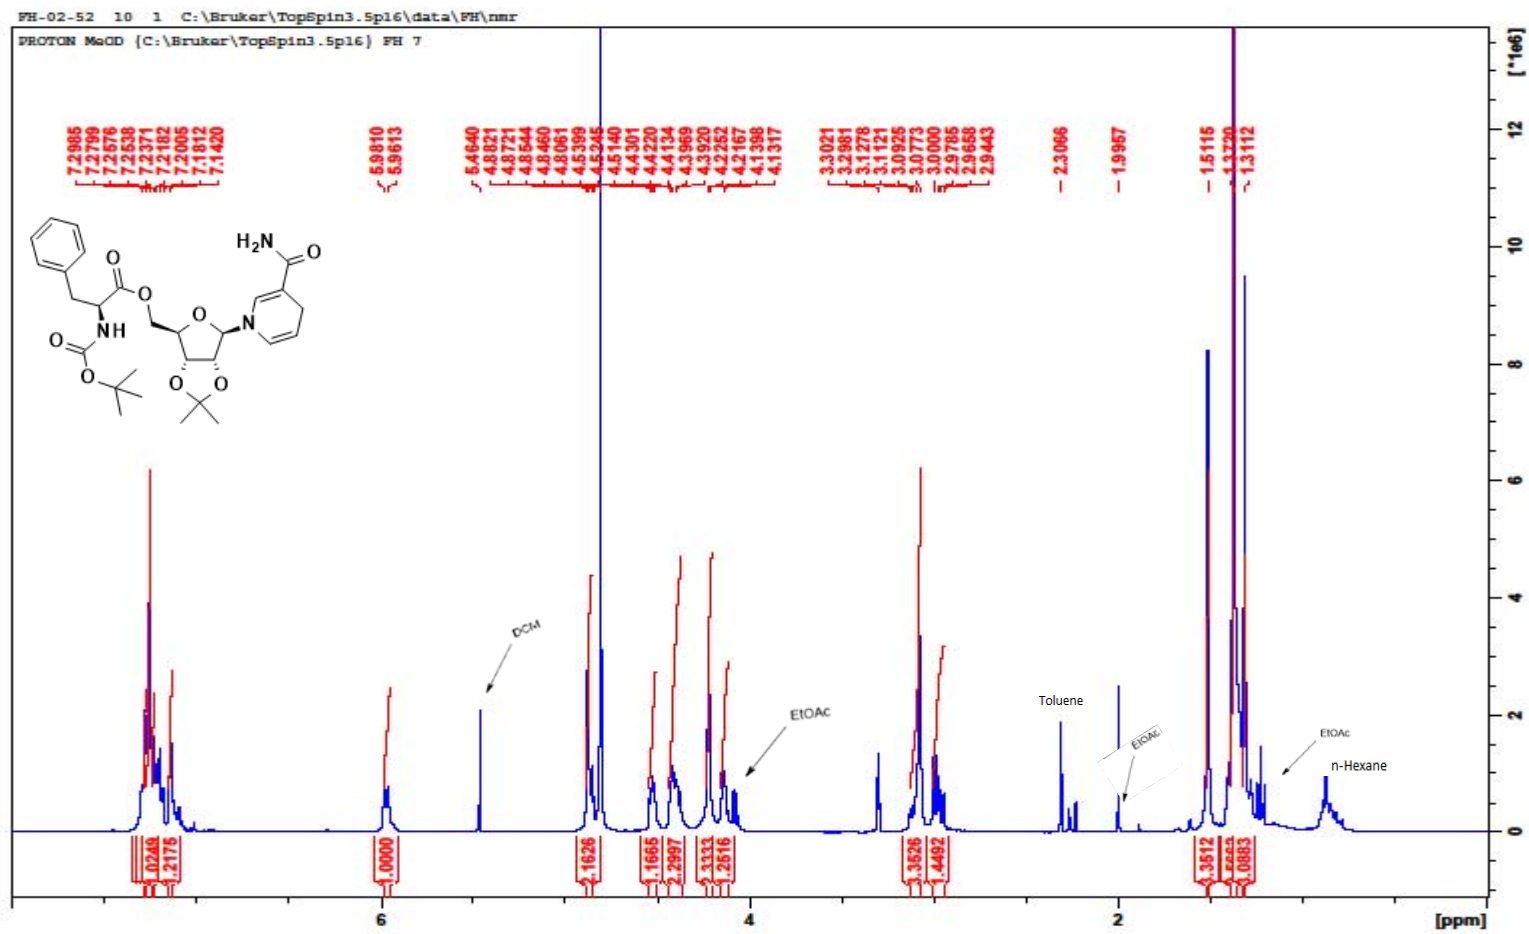

Compound 10e. 400 MHz  $^1\text{H}$  NMR spectrum in MeOD

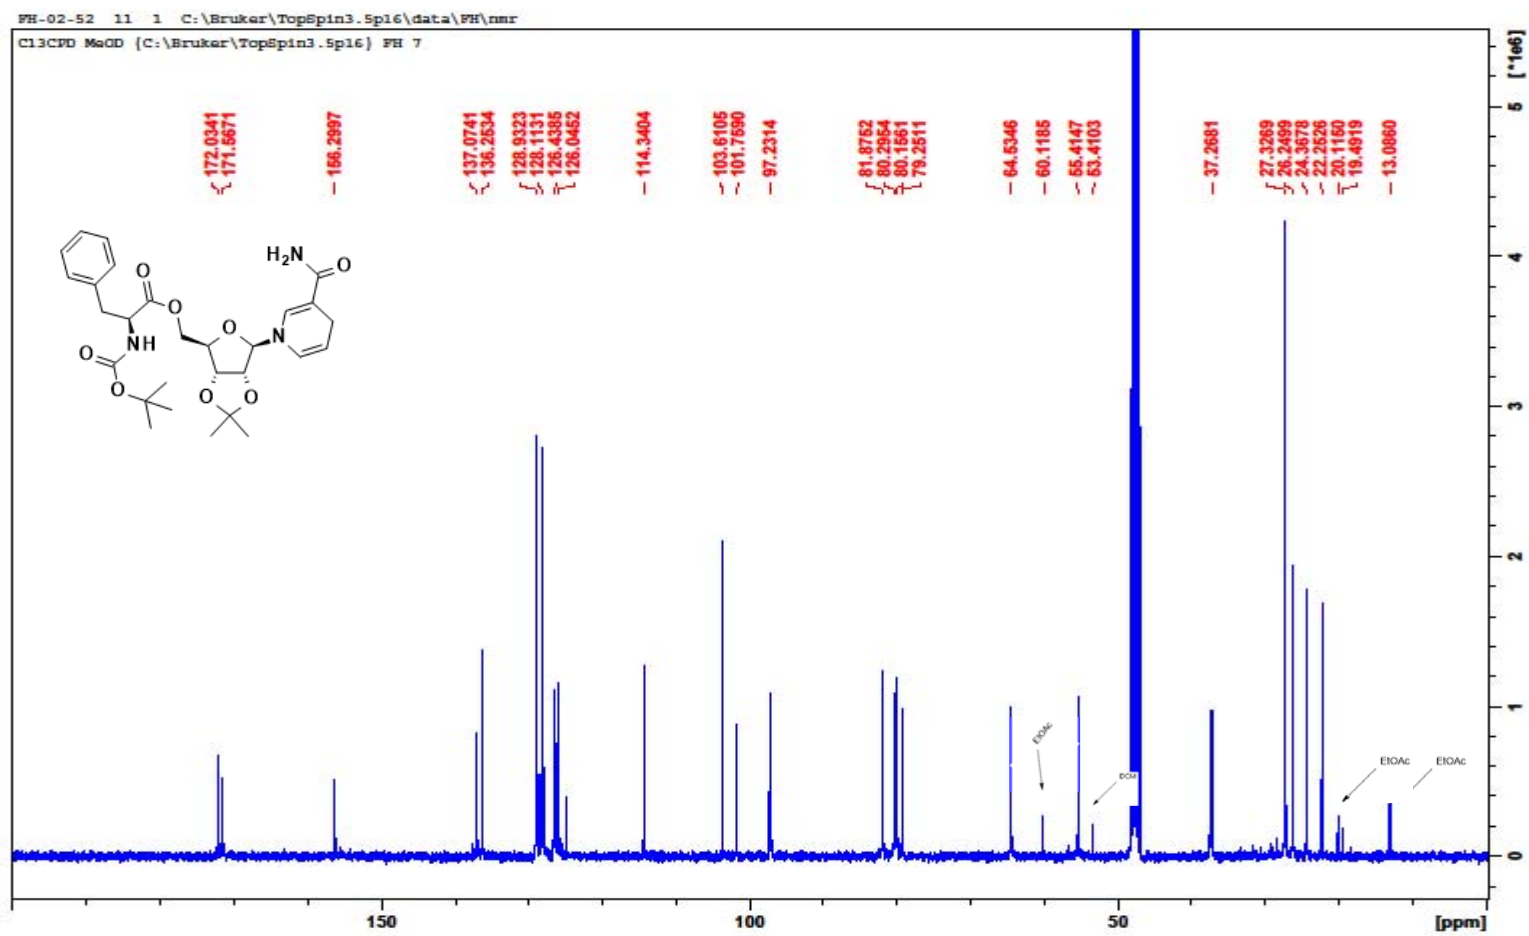

Compound 10e. 100 MHz  $^{13}\text{C}$  NMR spectrum in MeOD

mm\_072219\_nrh\_phenylalanine\_1 #5-28 RT: 0.07-0.26 AV: 8 NL: 2.55E7  
F: FTMS + p ESI Full ms [100.00-600.00]

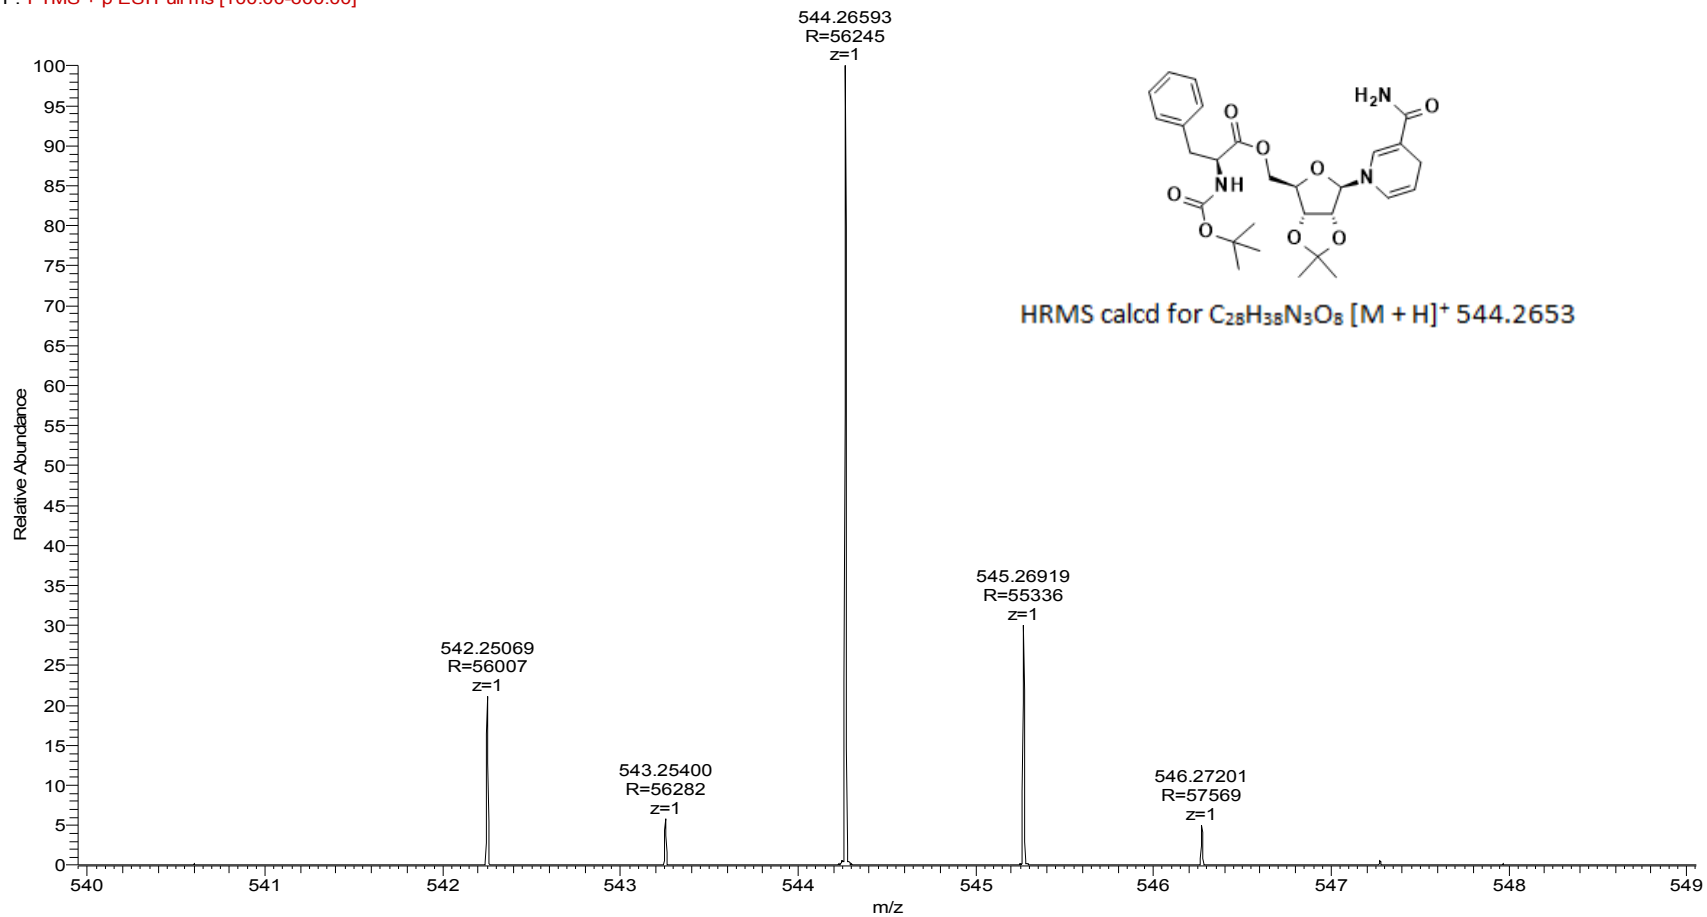

Compound 10e. HRMS spectra



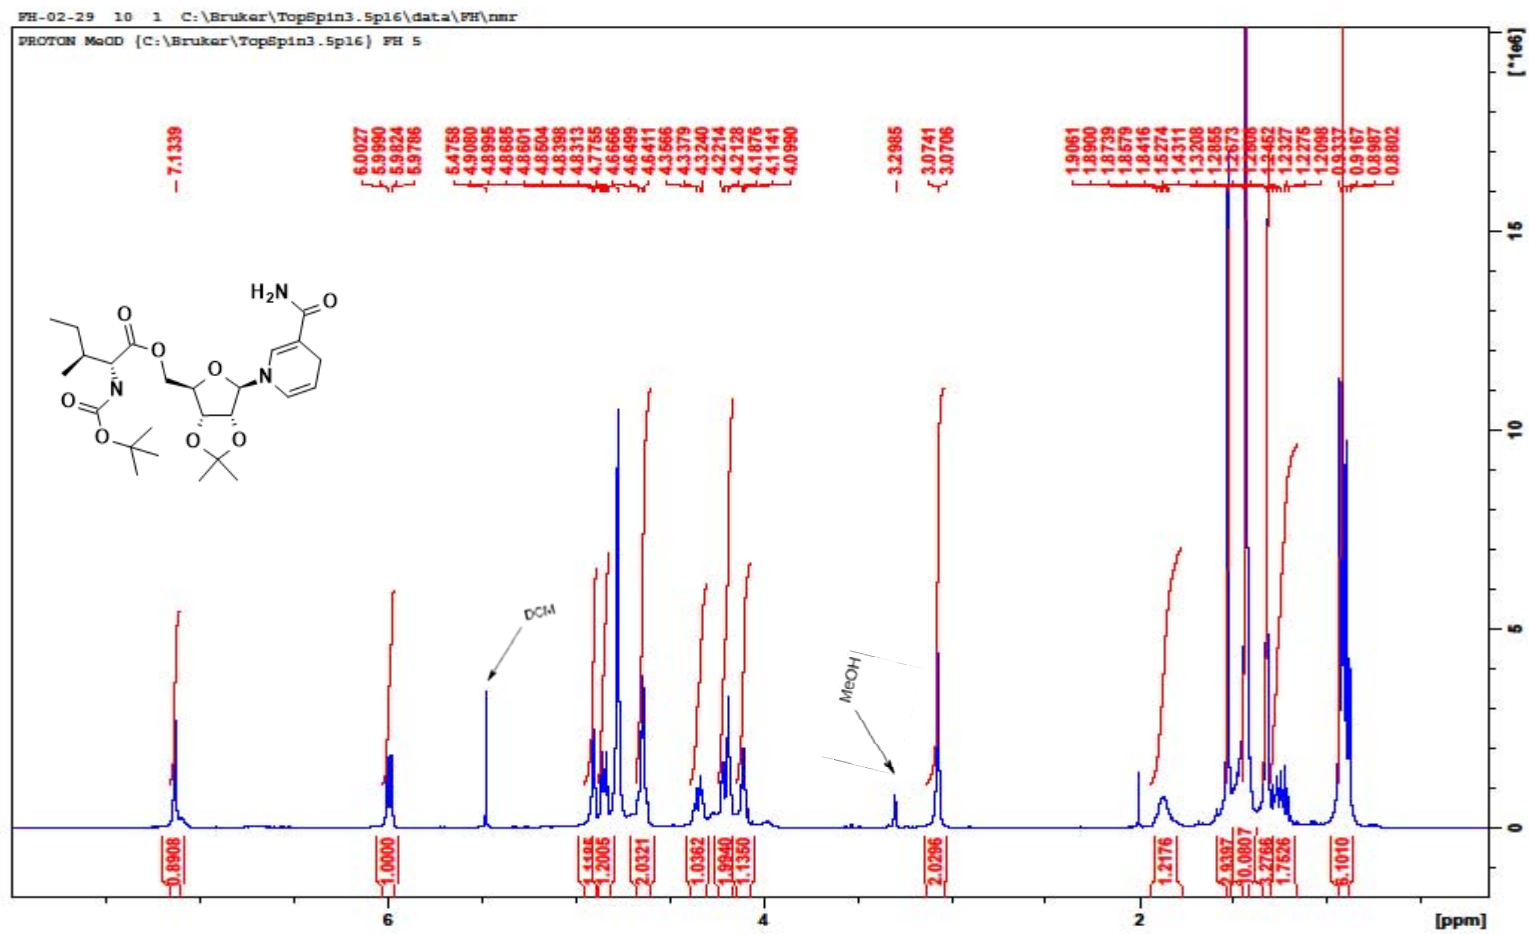

Compound 10f. 400 MHz  $^1\text{H}$  NMR spectrum in MeOD

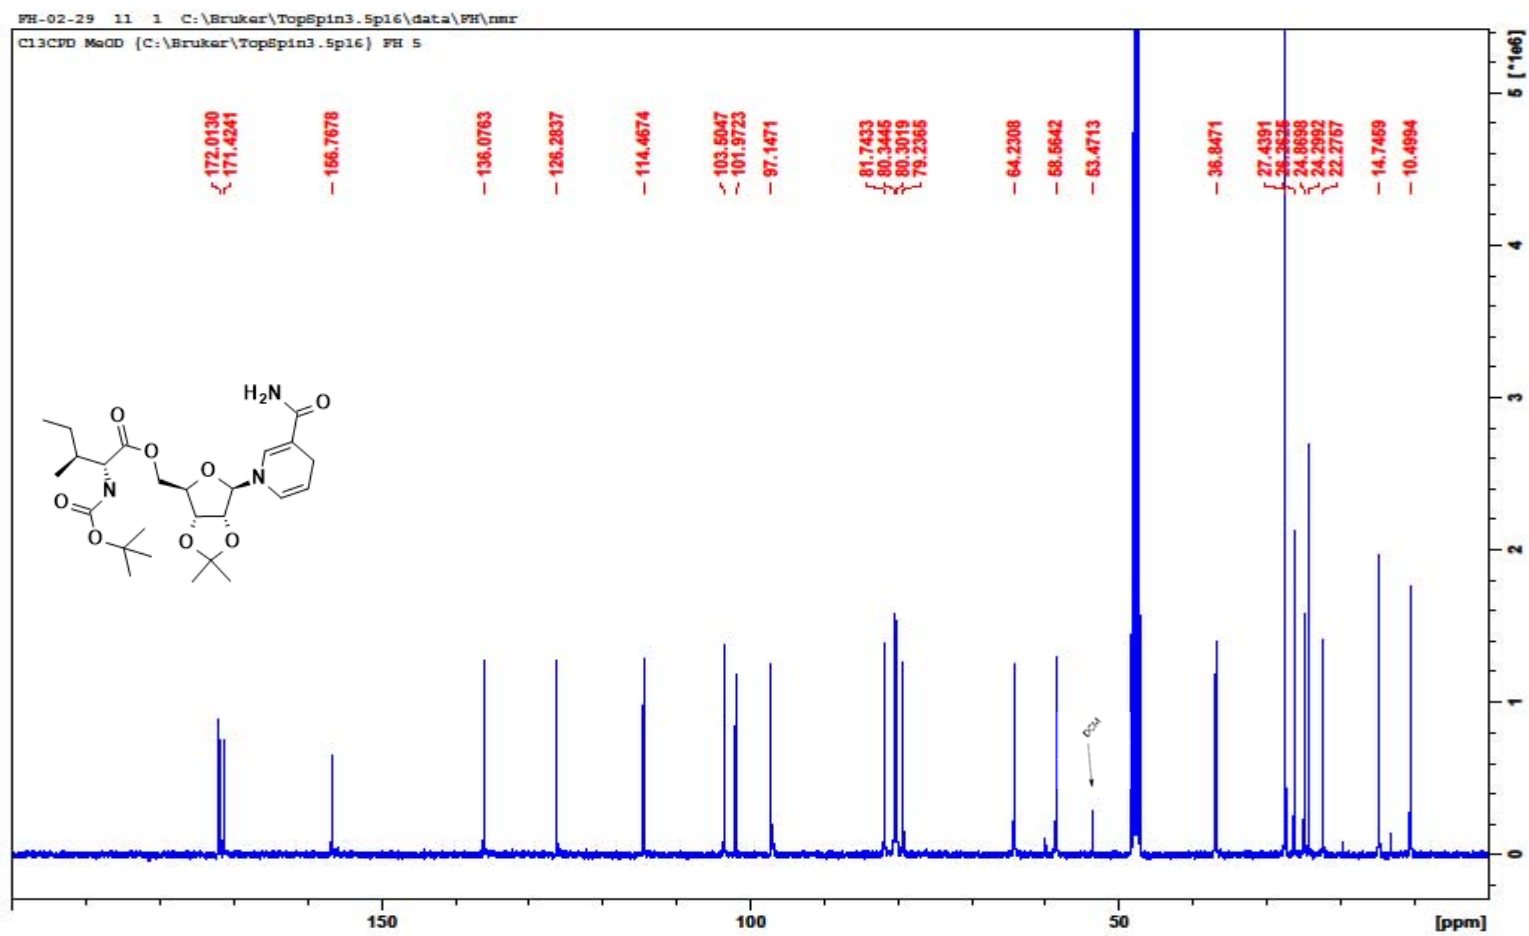

Compound 10f. 100 MHz  $^{13}\text{C}$  NMR spectrum in MeOD

mm\_101618\_nrh\_isoleucine\_01 #17-33 RT: 0.25-0.49 AV: 17 SB: 81 5.78-7.06 NI: 2.47E7  
F: FTMS + p ESI Full ms [200.00-1050.00]

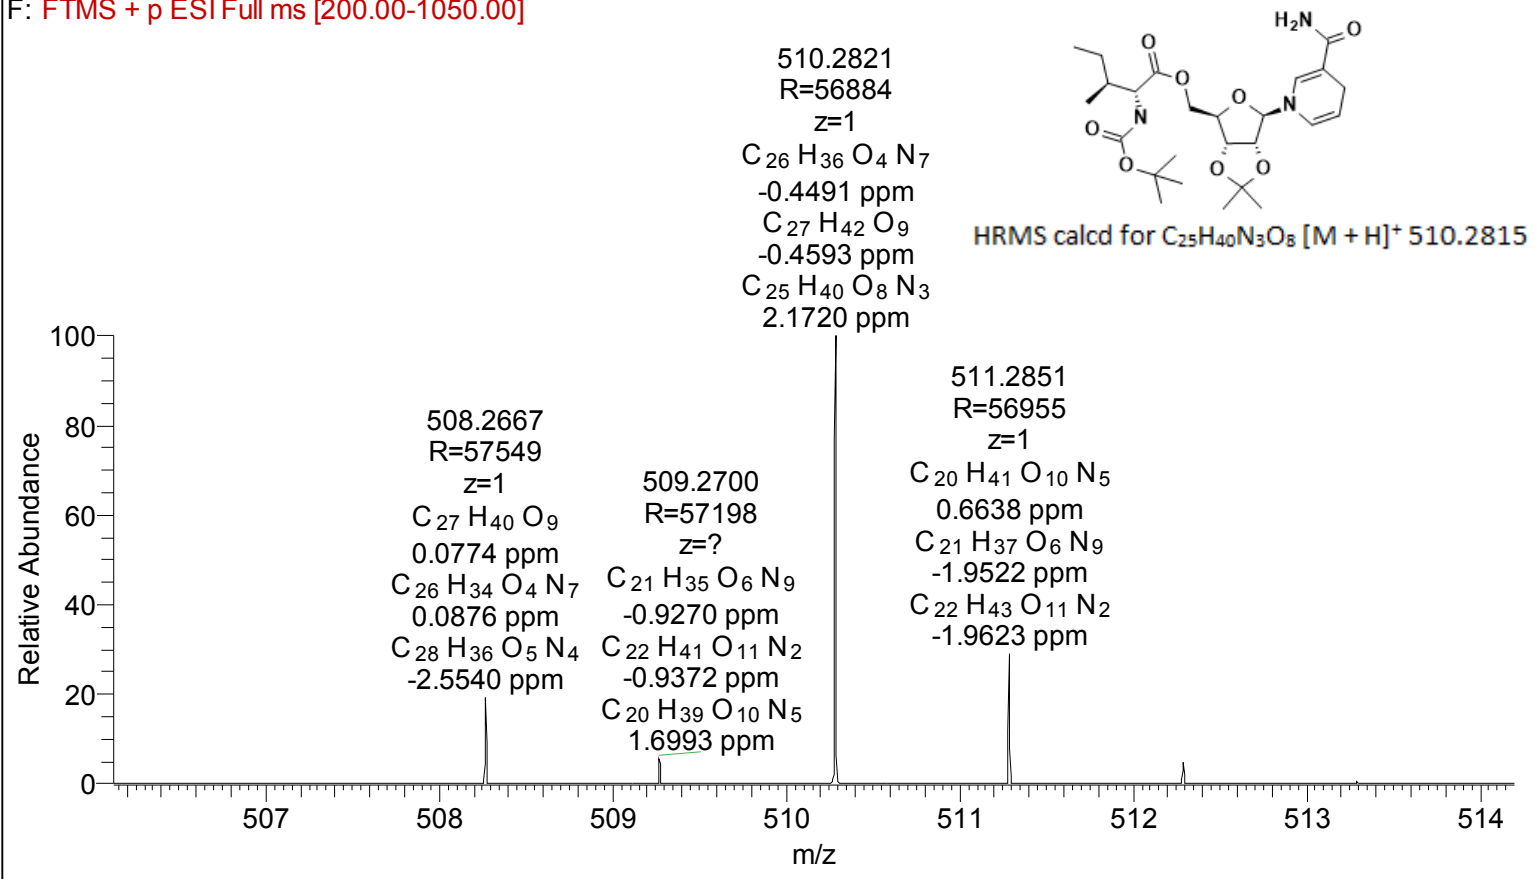

Compound 10f. HRMS spectra

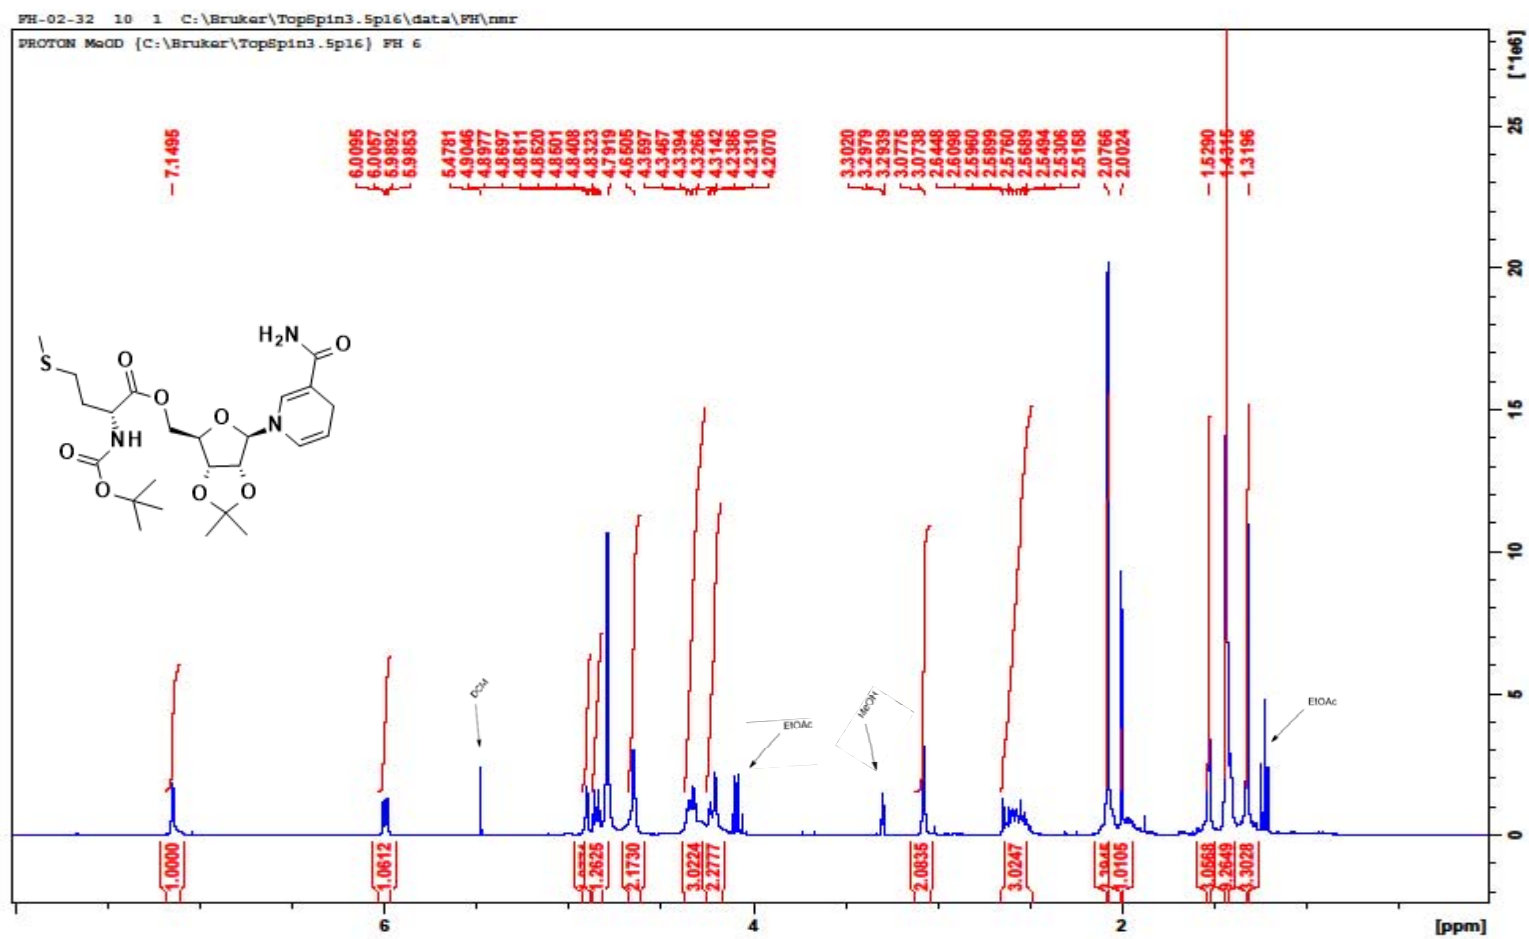

Compound 10g, 400 MHz <sup>1</sup>H NMR spectrum in MeOD

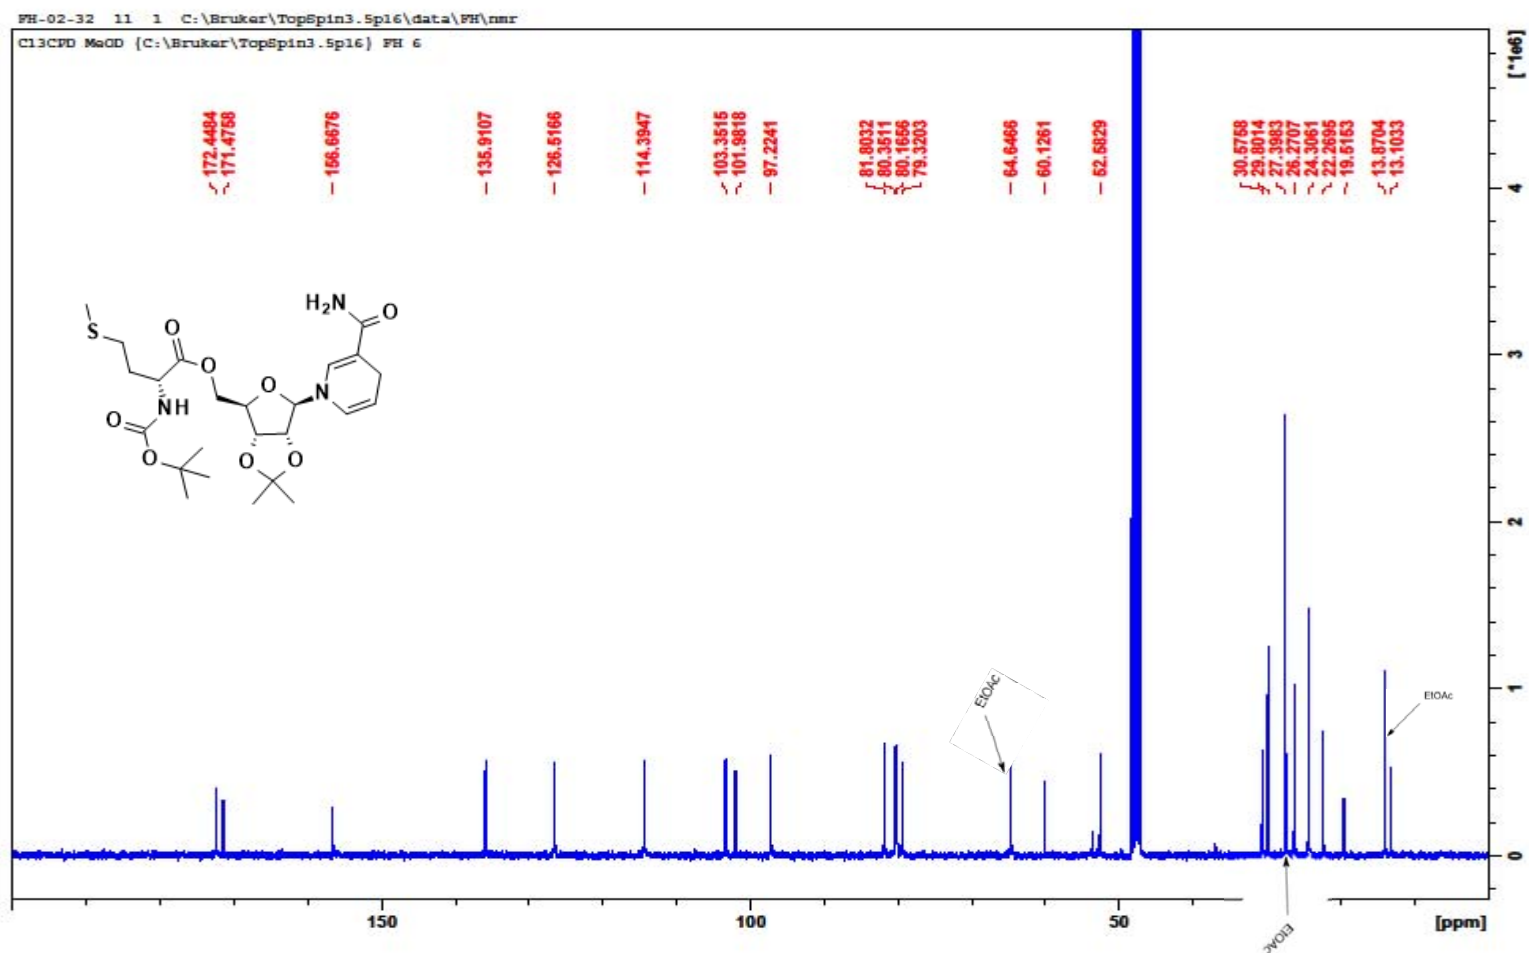

Compound 10g. 100 MHz  $^{13}\text{C}$  NMR spectrum in MeOD

mm\_101618\_nrh\_methionine\_01 #18-32 RT: 0.26-0.47 AV: 15 SB: 81 5.78-7.06 NL: 2.46E7

F: FTMS + p ESI Full ms [200.00-1050.00]

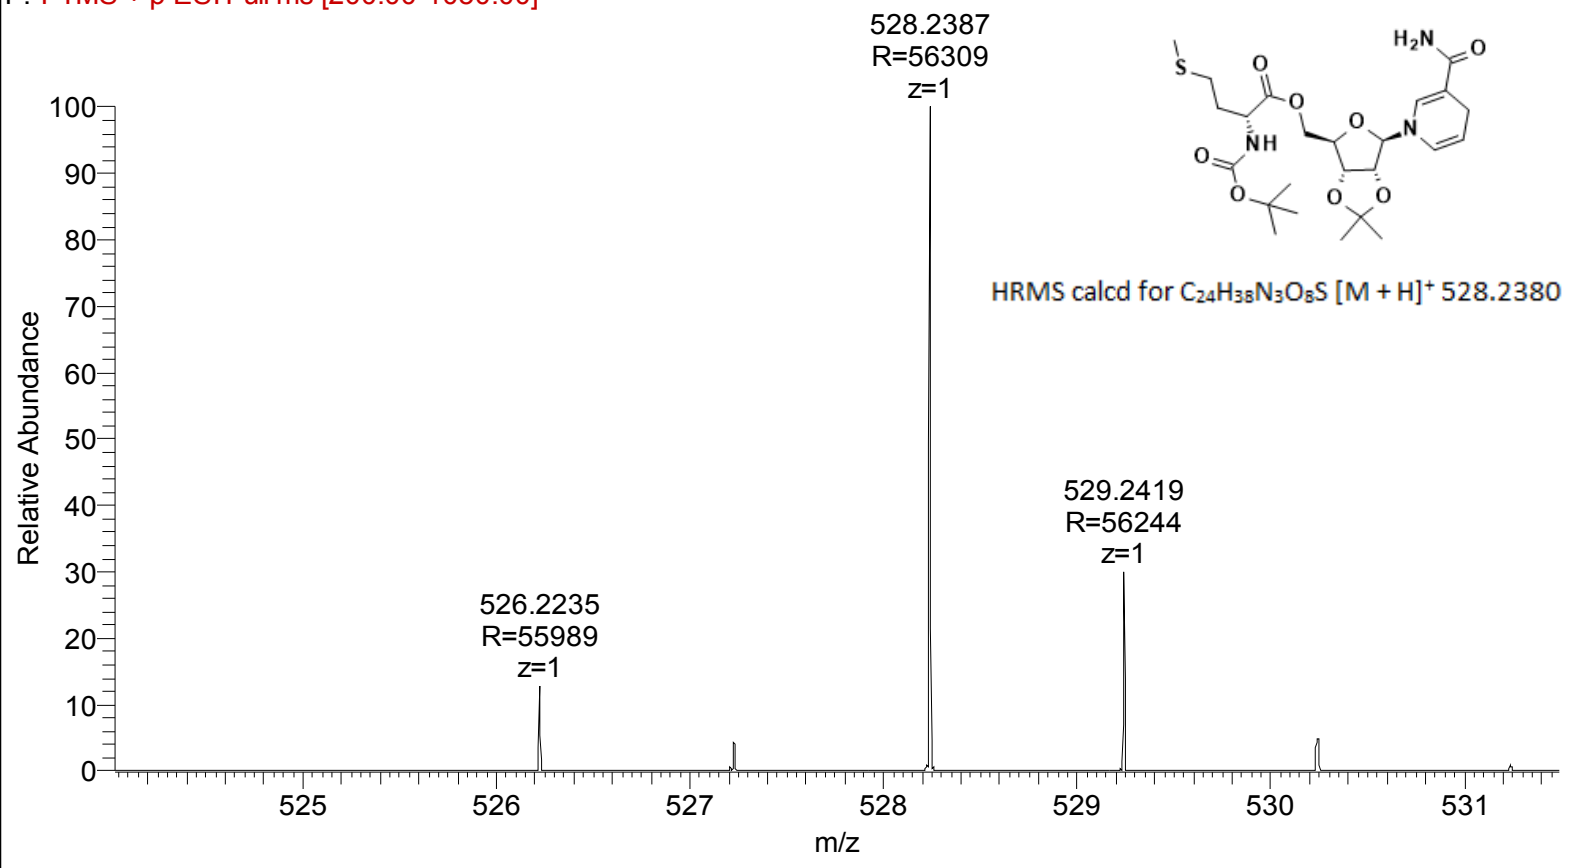

Compound 10g. HRMS spectra

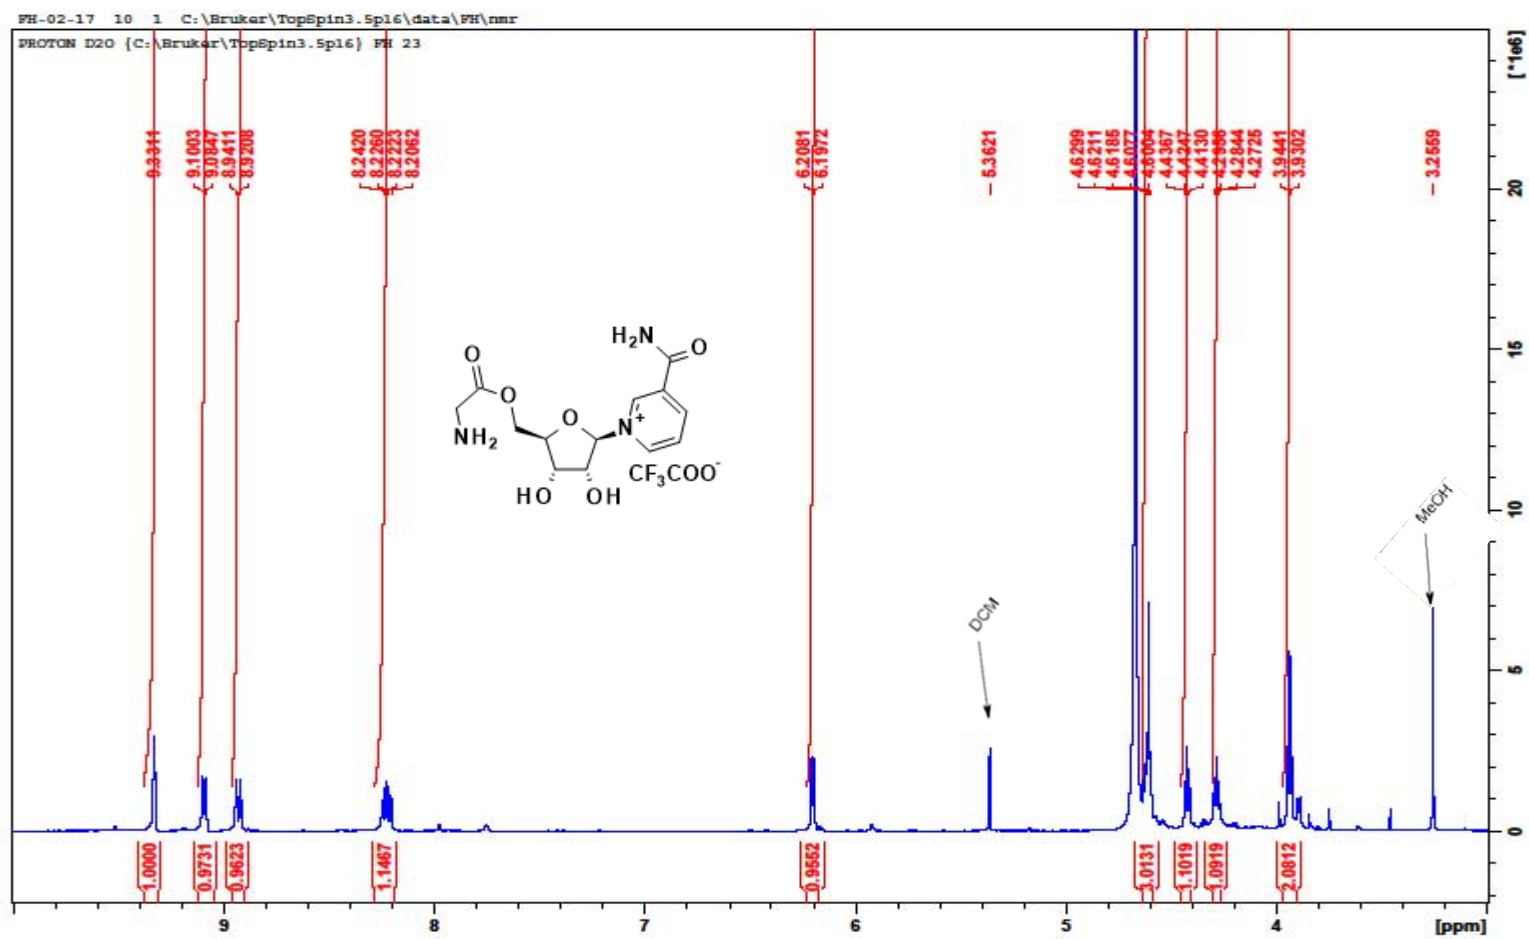

Compound 12a. 400 MHz  $^1\text{H}$  NMR spectrum in  $\text{D}_2\text{O}$

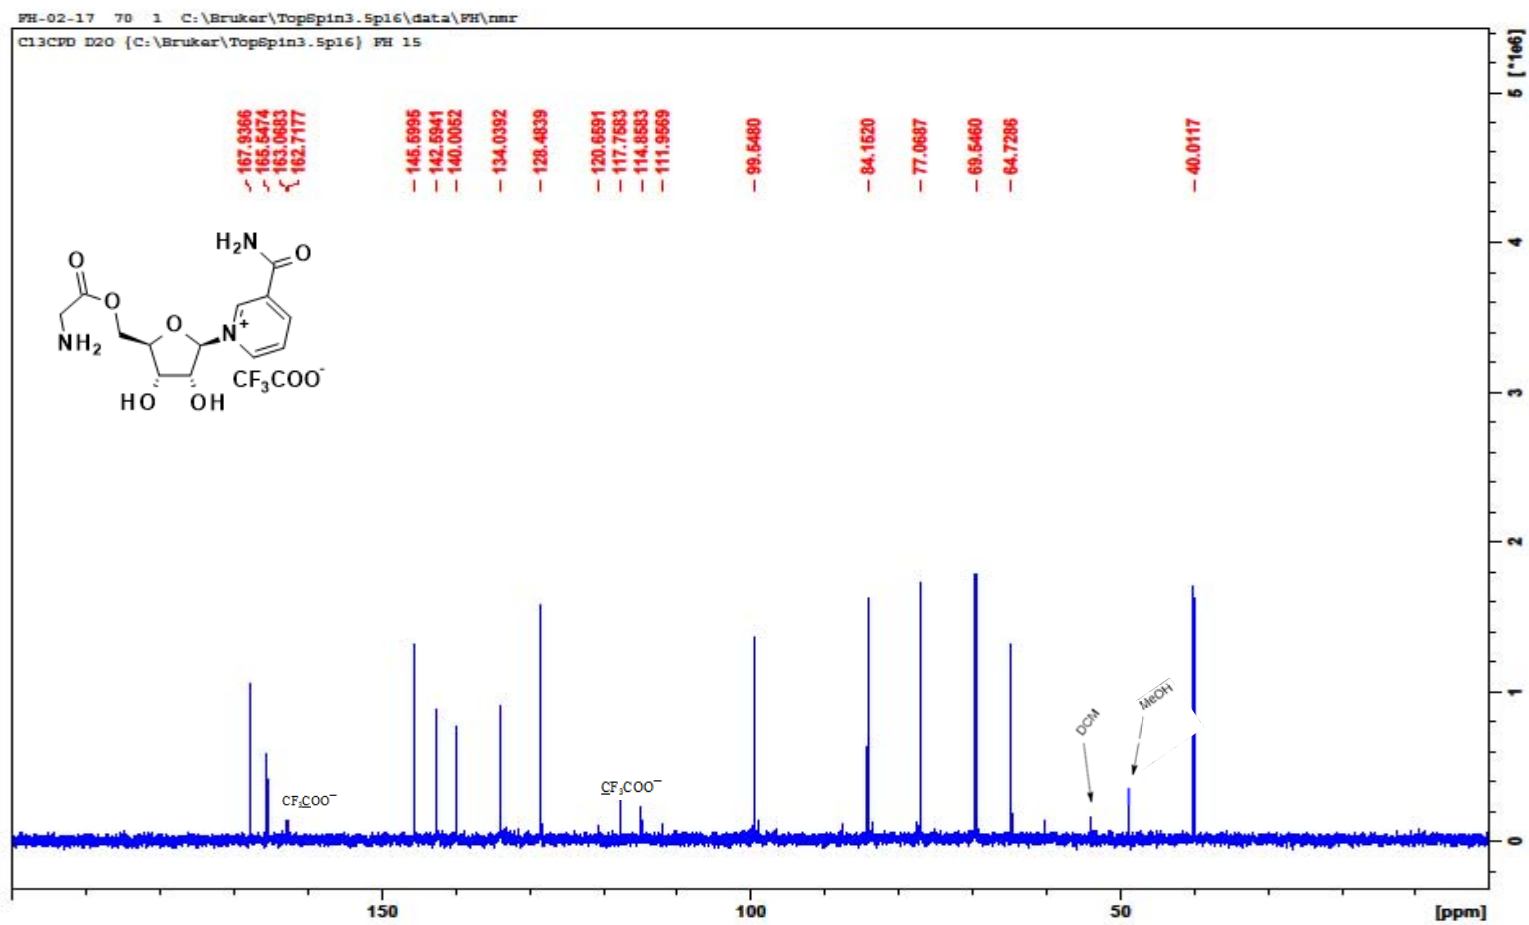

Compound 12a. 100 MHz  $^{13}C$  NMR spectrum in  $D_2O$



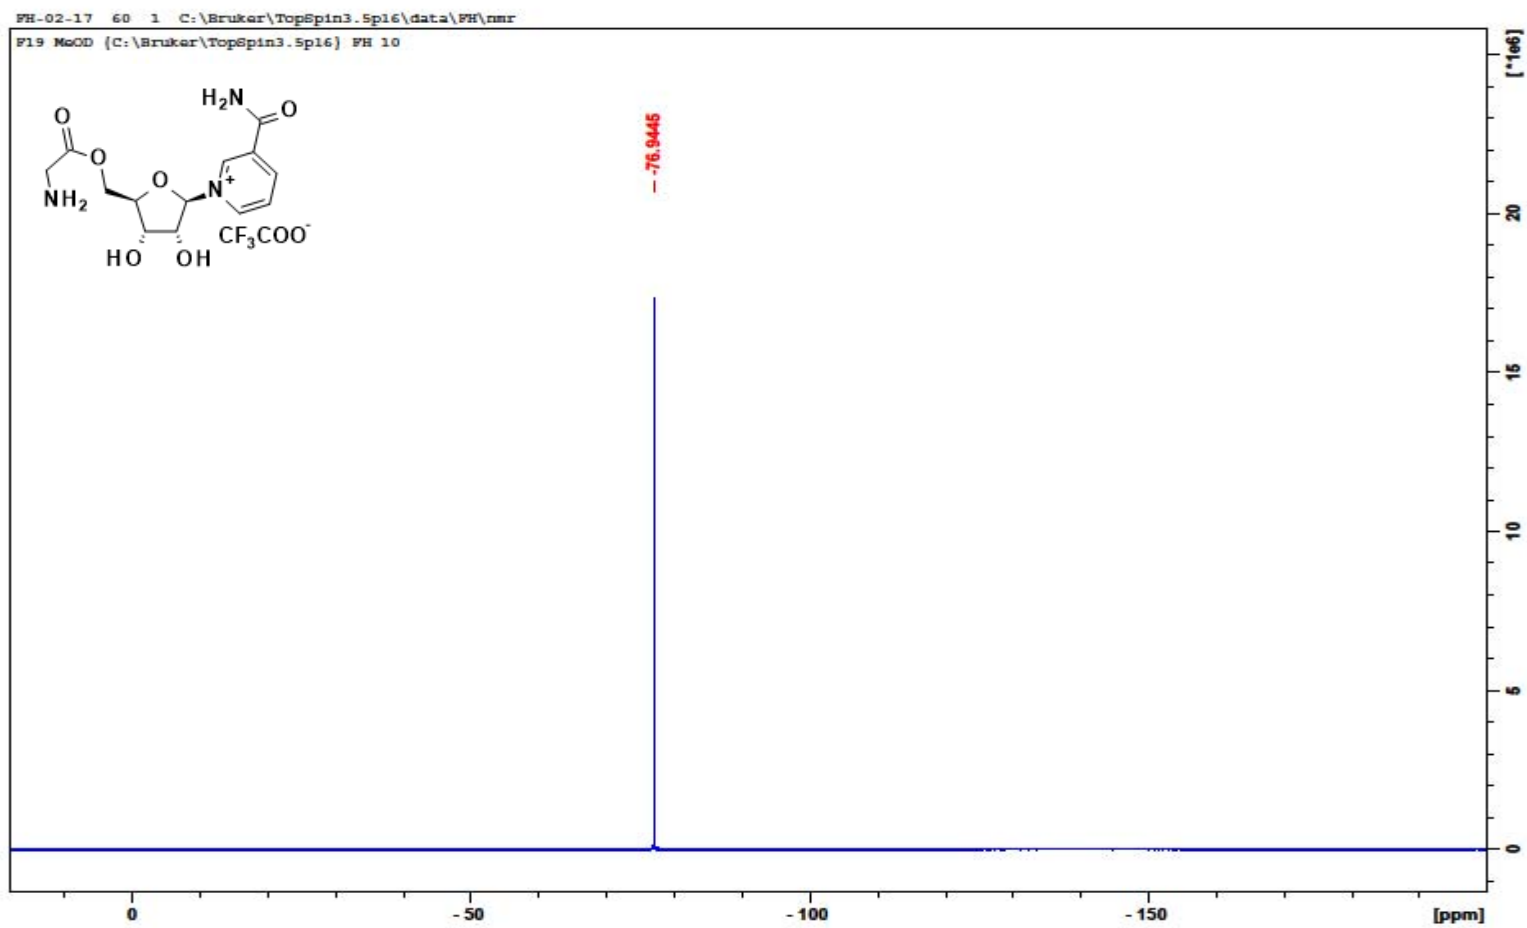

Compound 12a. 377 MHz  $^{19}\text{F}$  NMR spectrum in MeOD

mm\_101618\_nr\_glycine\_01 #13-21 RT: 0.18-0.31 AV: 9 SB: 82 5.78-7.07 NL: 2.79E6  
F: FTMS + p ESI Full ms [200.00-1050.00]

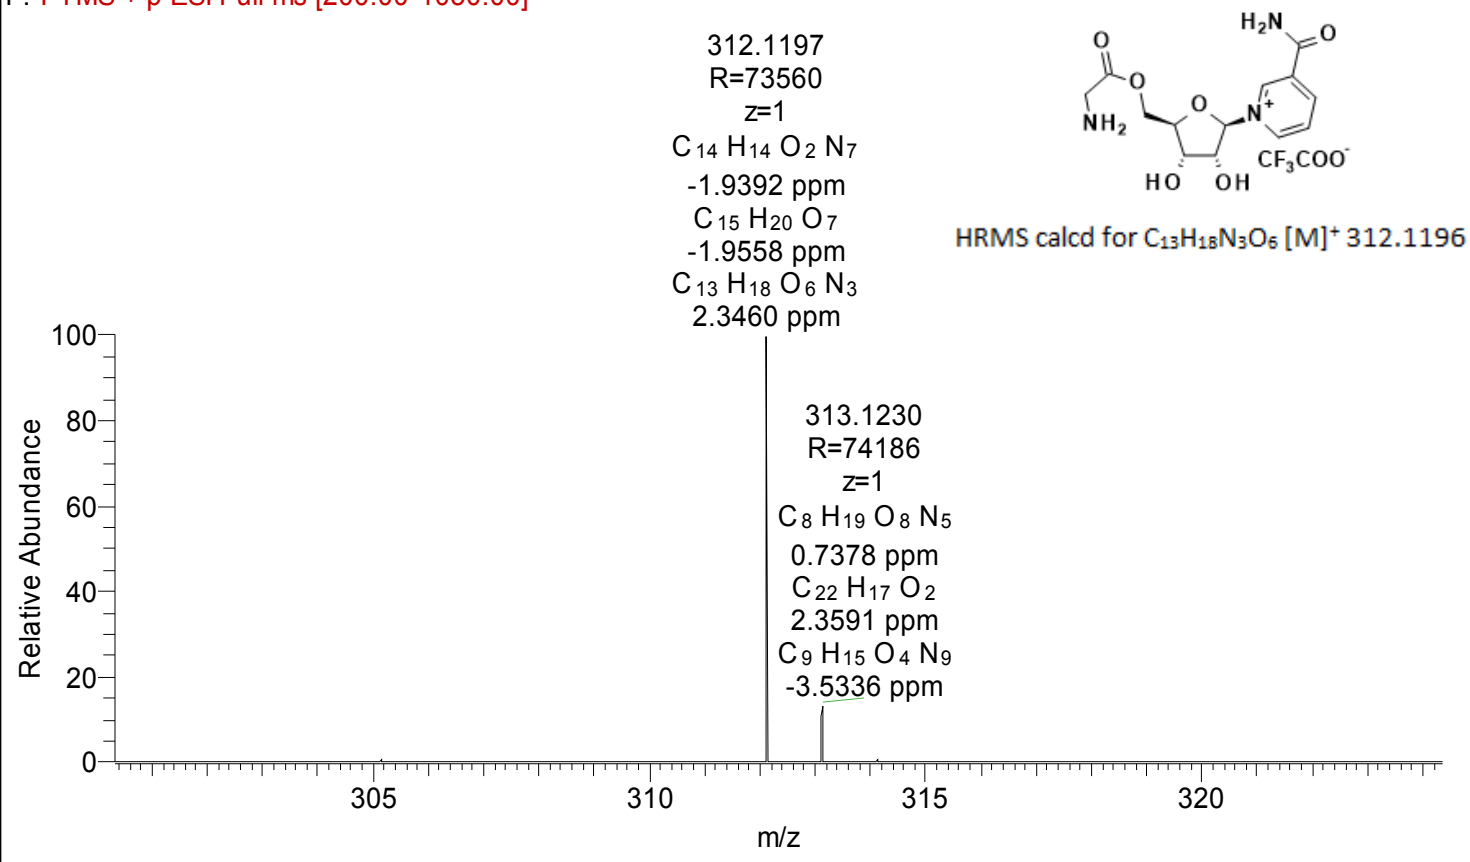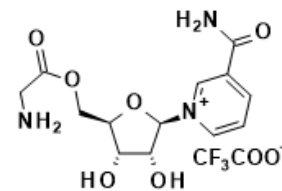

Compound 12a. HRMS spectra

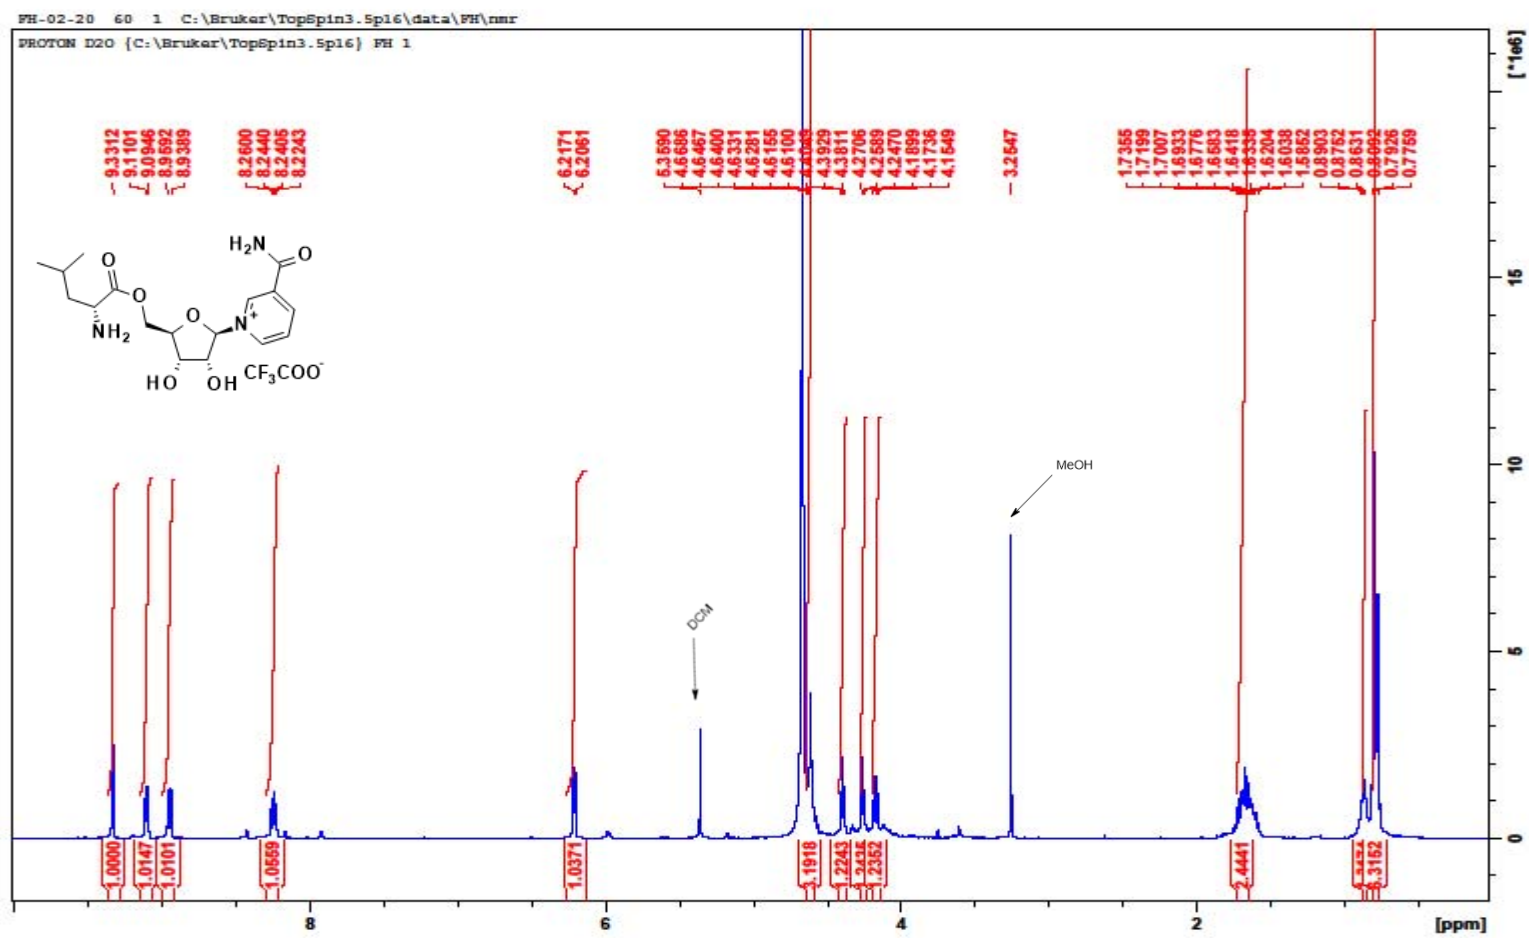

Compound 12b. 400 MHz  $^1\text{H}$  NMR spectrum in  $\text{D}_2\text{O}$

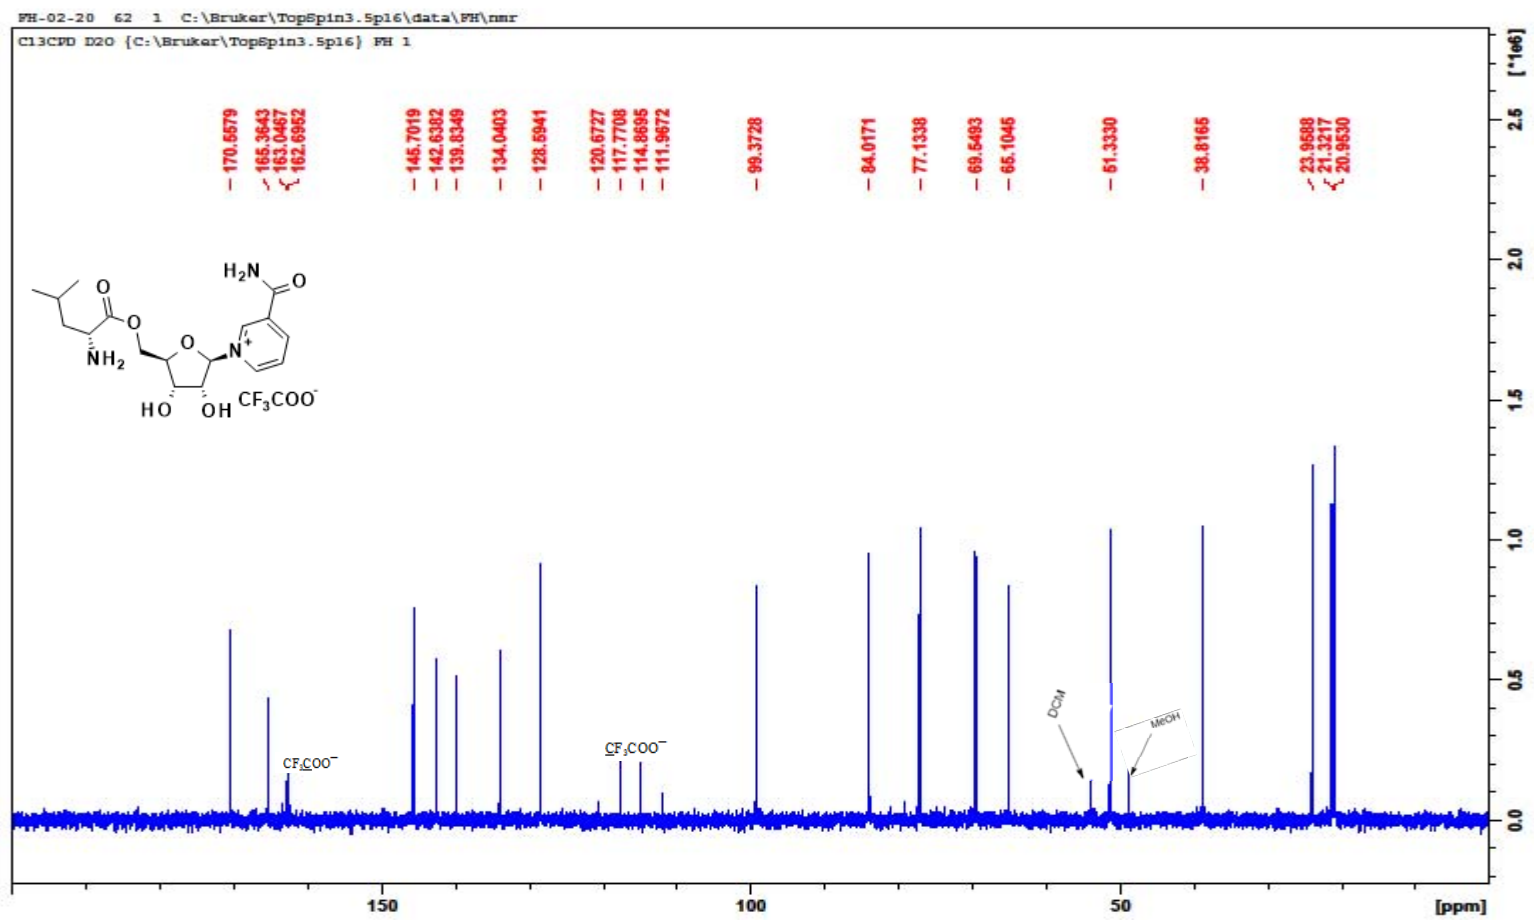

Compound 12b. 100 MHz  $^{13}C$  NMR spectrum in  $D_2O$

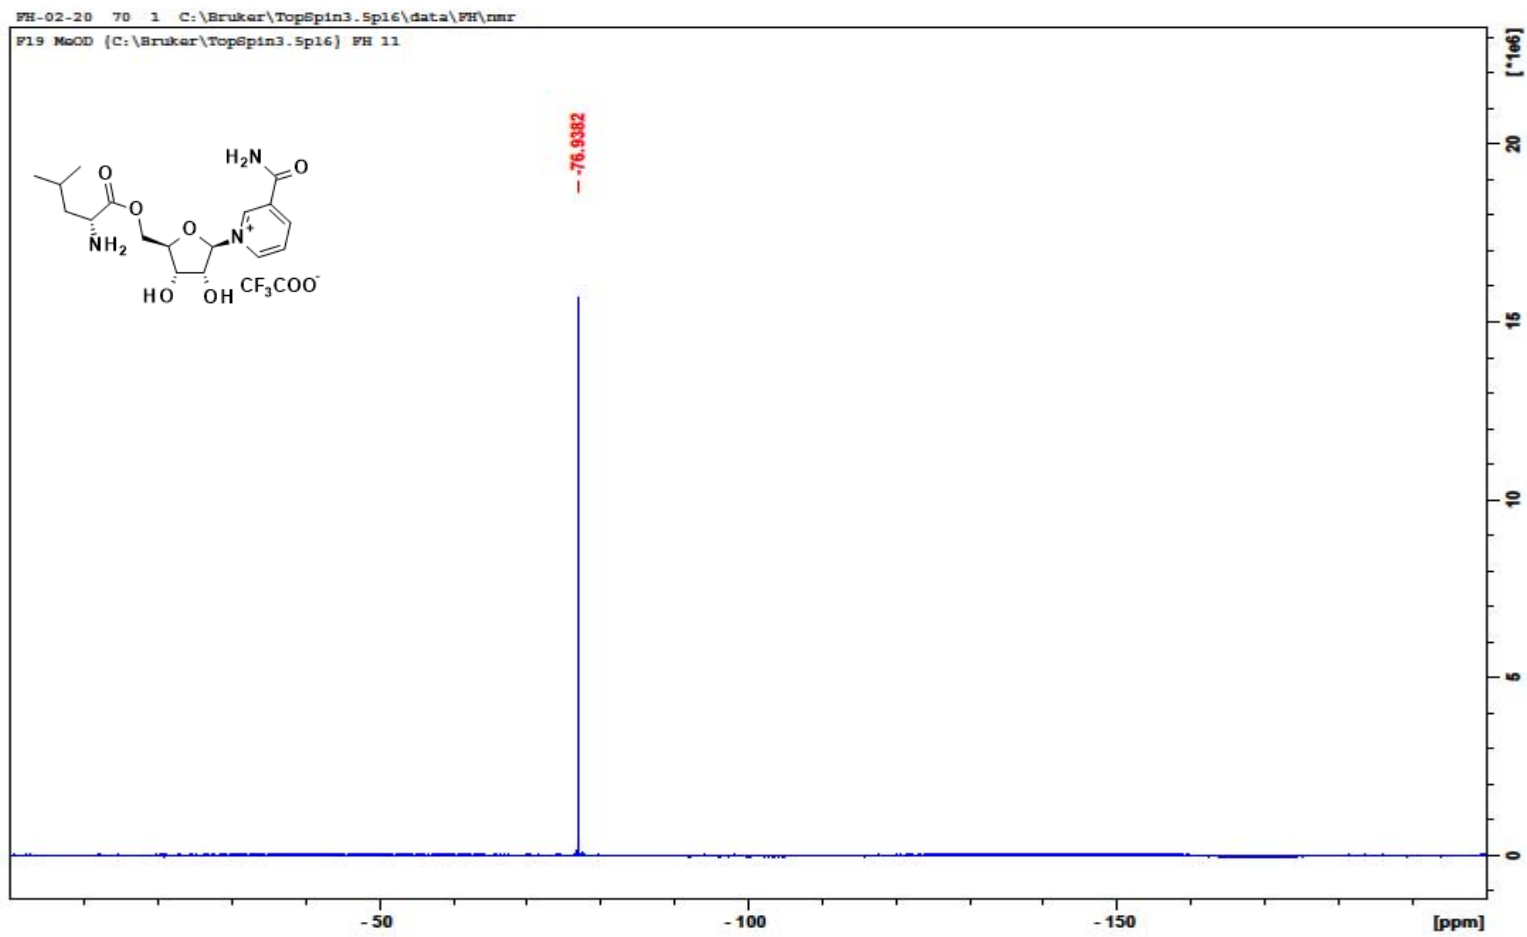

Compound 12b. 377 MHz  $^{19}\text{F}$  NMR spectrum in MeOD

mm\_101618\_nr\_leucine\_01 #13-22 RT: 0.18-0.32 AV: 10 SB: 82 5.78-7.06 NL: 4.94E6

F: FTMS + p ESI Full ms [200.00-1050.00]

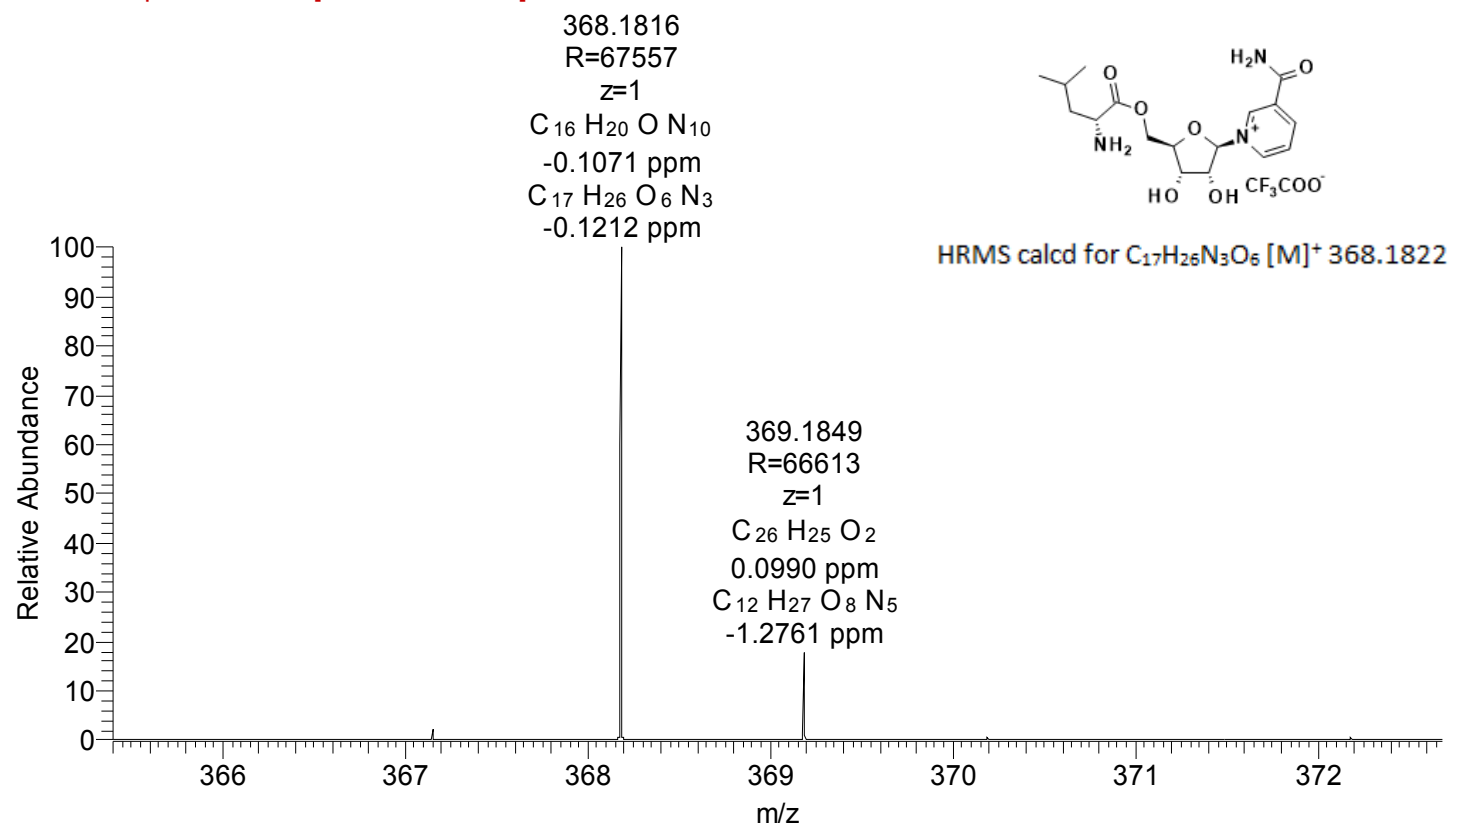

Compound 12b. HRMS spectra

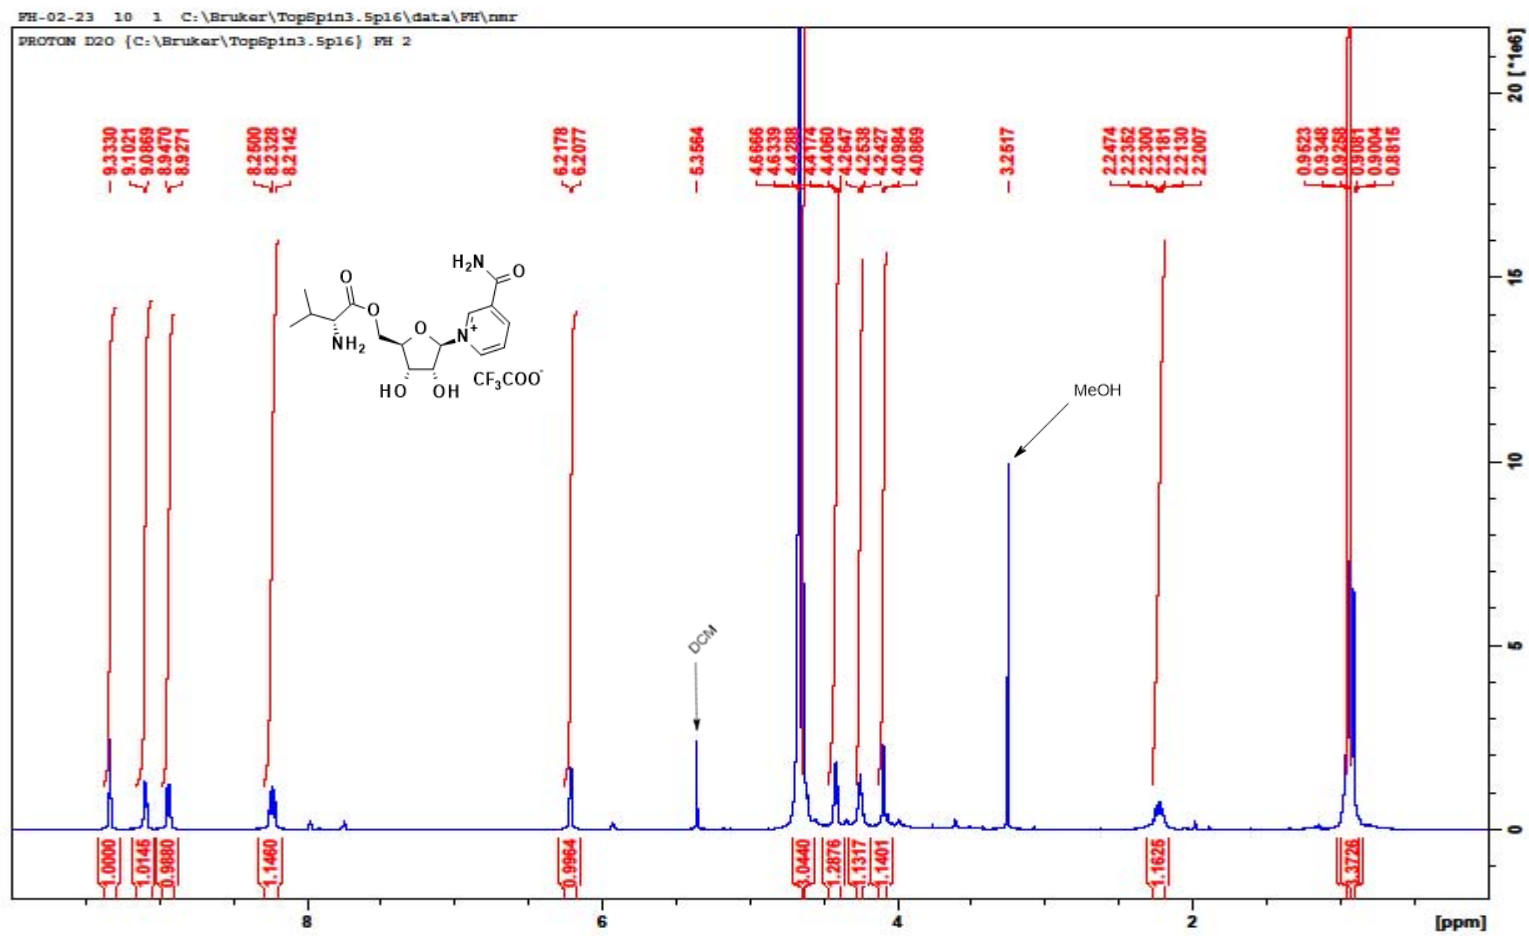

Compound 12c. 400 MHz  $^1\text{H}$  NMR spectrum in  $\text{D}_2\text{O}$

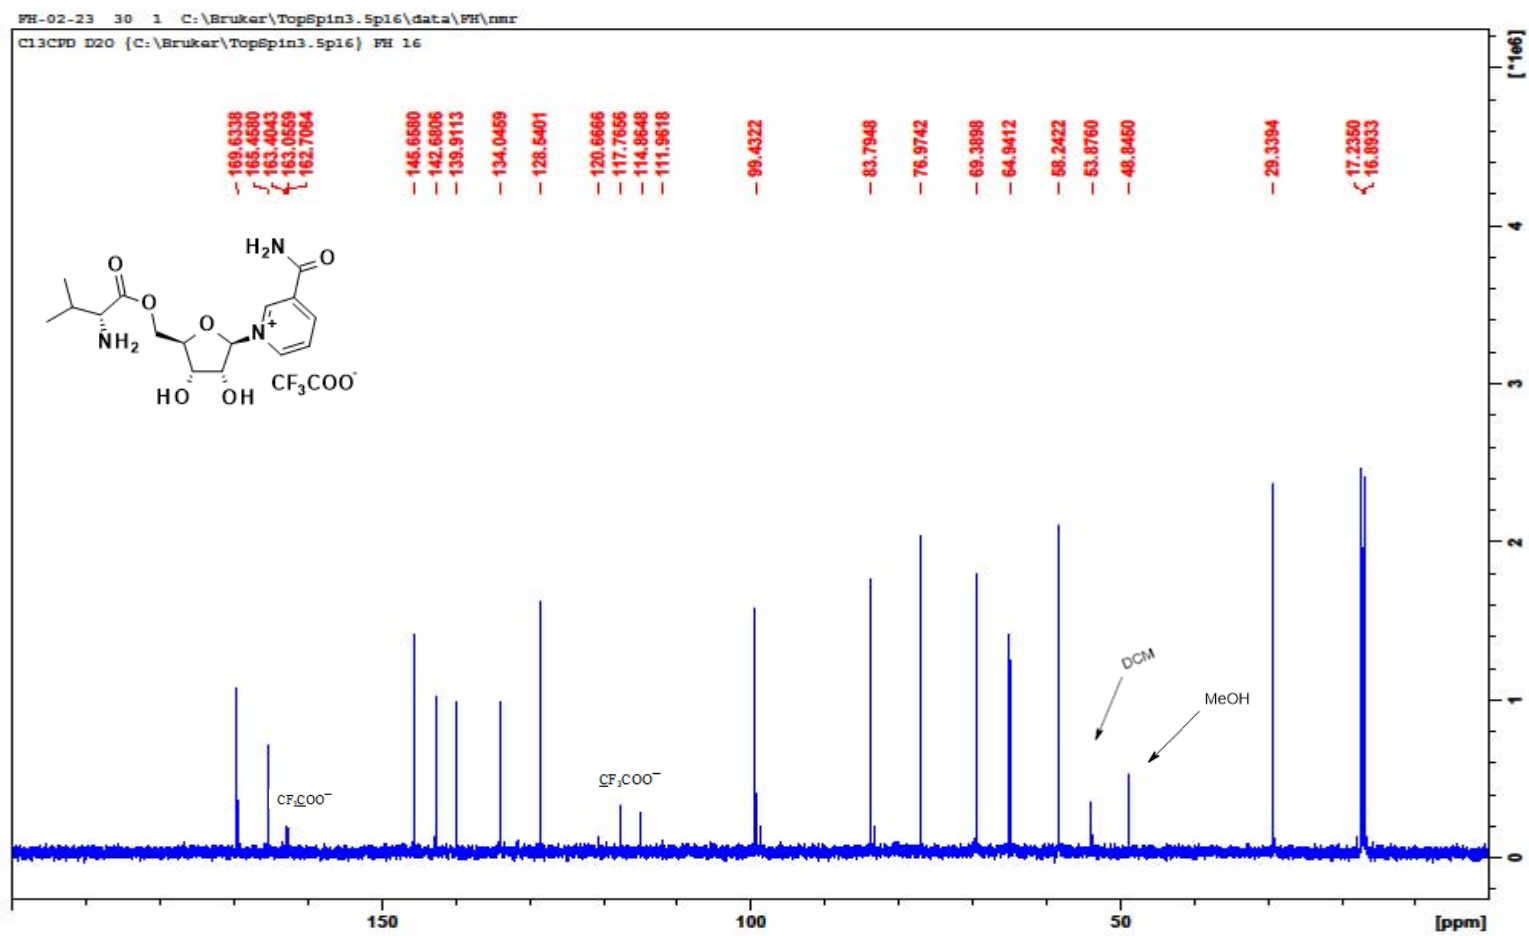

Compound 12c. 100 MHz <sup>13</sup>C NMR spectrum in D<sub>2</sub>O



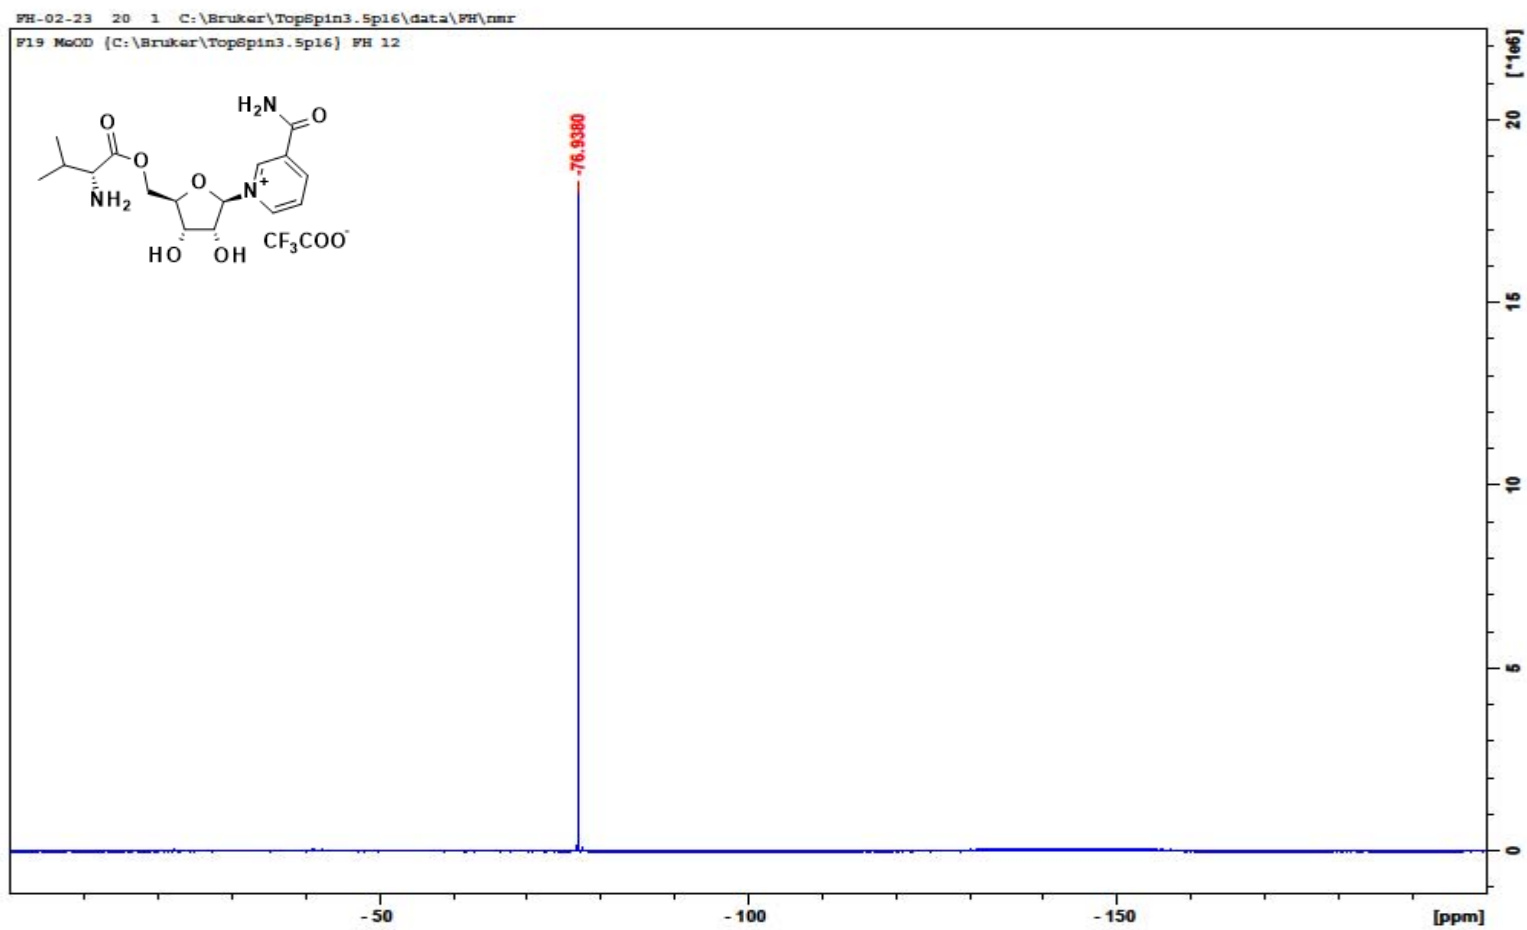

Compound 12c. 377 MHz  $^{19}\text{F}$  NMR spectrum in MeOD

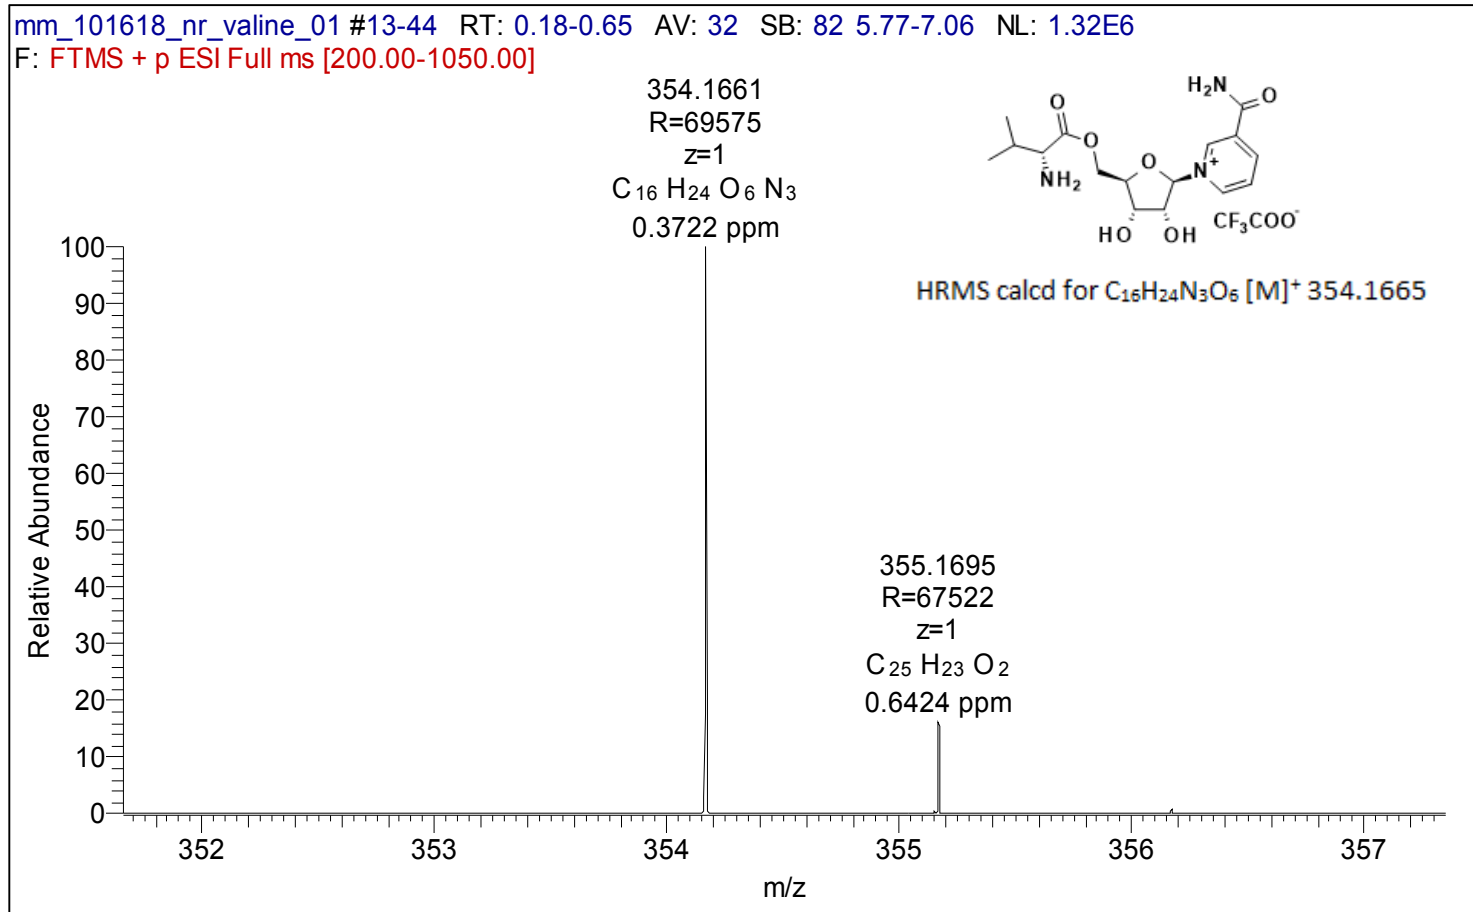

Compound 12c. HRMS spectra

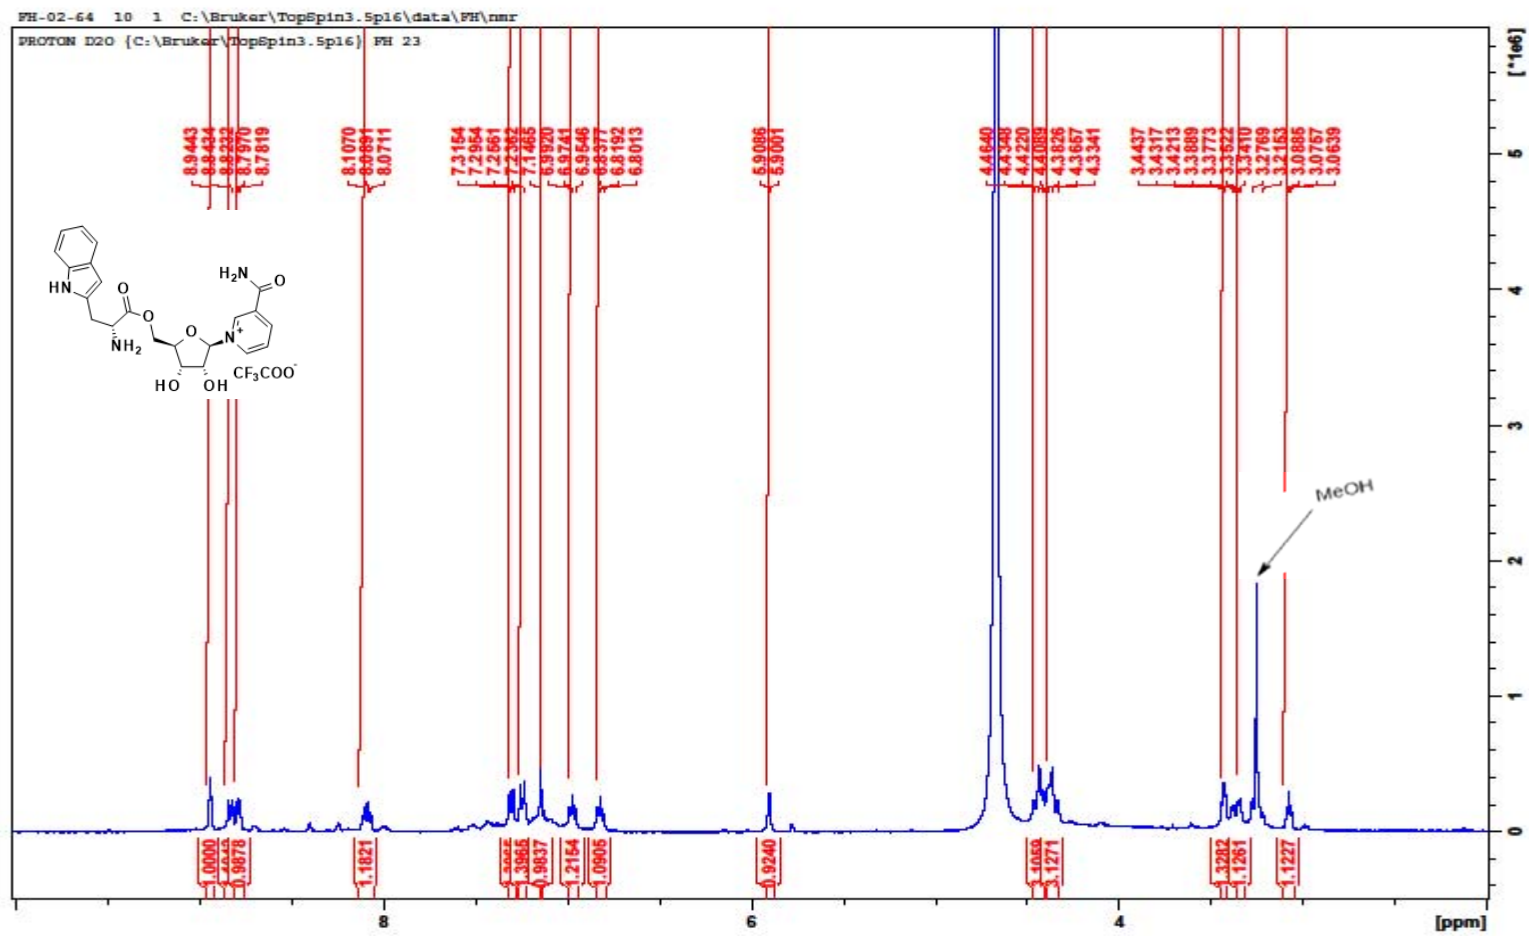

Compound 12d. 400 MHz  $^1\text{H}$  NMR spectrum in  $\text{D}_2\text{O}$

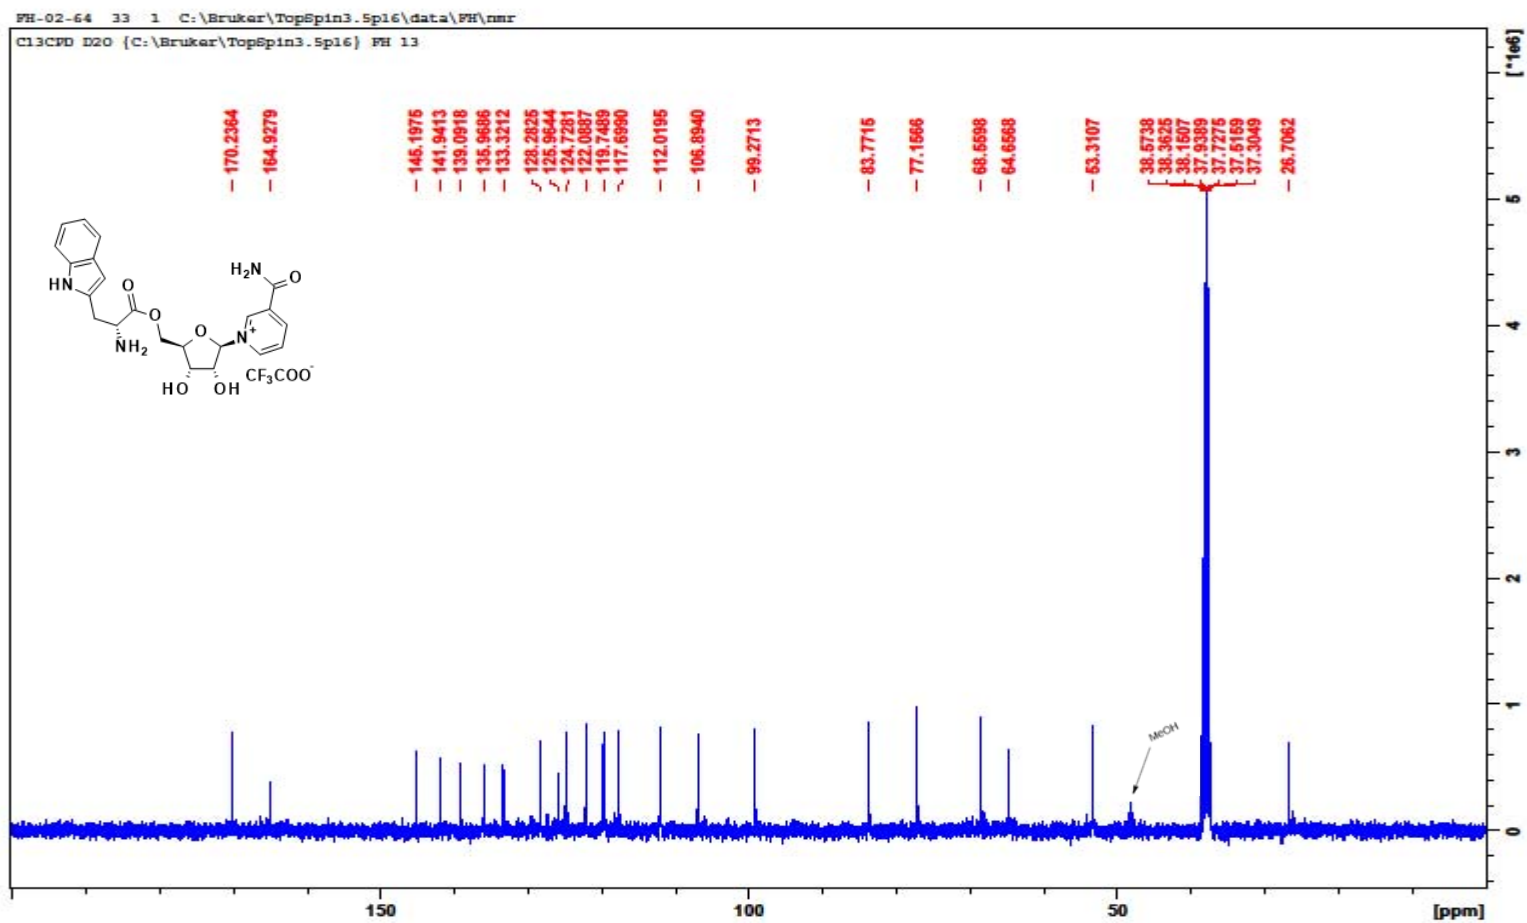

Compound 12d. 100 MHz  $^{13}\text{C}$  NMR spectrum in  $\text{D}_2\text{O}$

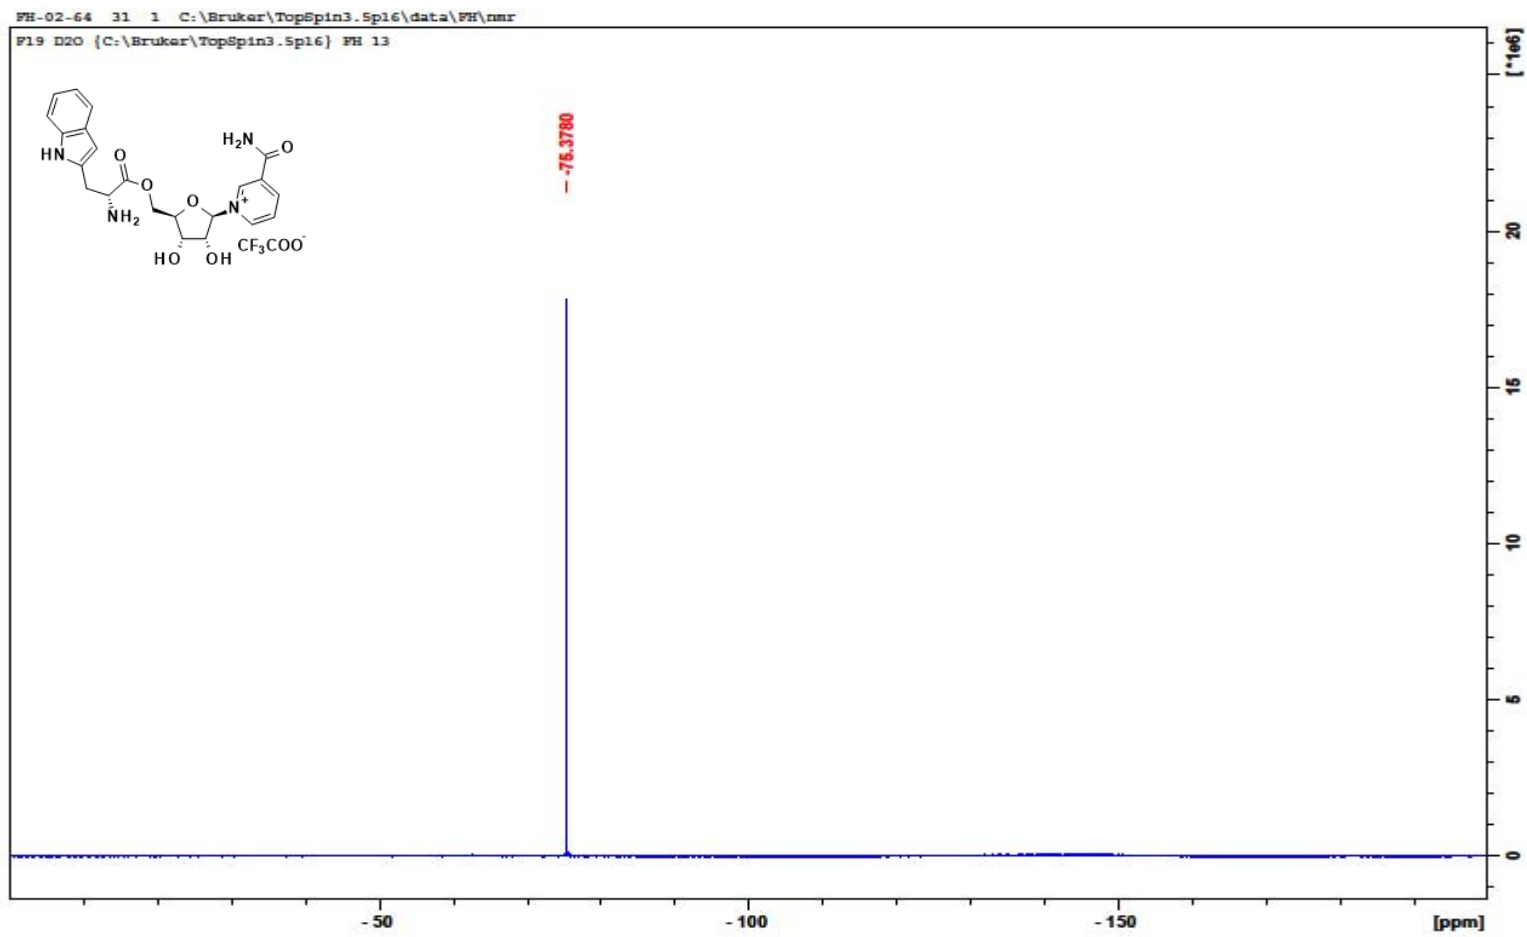

Compound 12d. 377 MHz  $^{19}\text{F}$  NMR spectrum in MeOD

mm\_101618\_nr\_tryptophan\_01 #13-21 RT: 0.18-0.31 AV: 9 SB: 82 5.78-7.07 NL: 7.47E5  
F: FTMS + p ESI Full ms [200.00-1050.00]

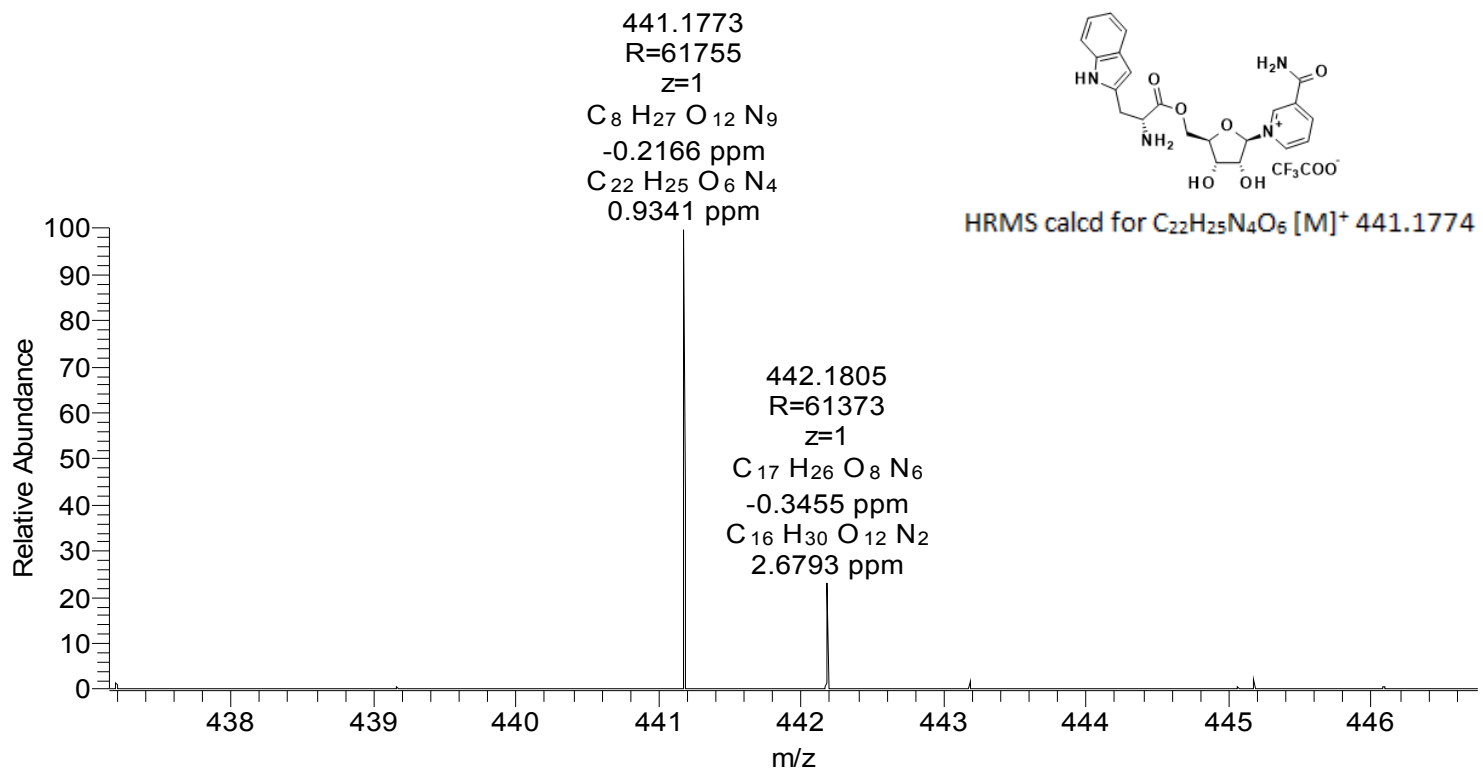

Compound 12d. HRMS spectra

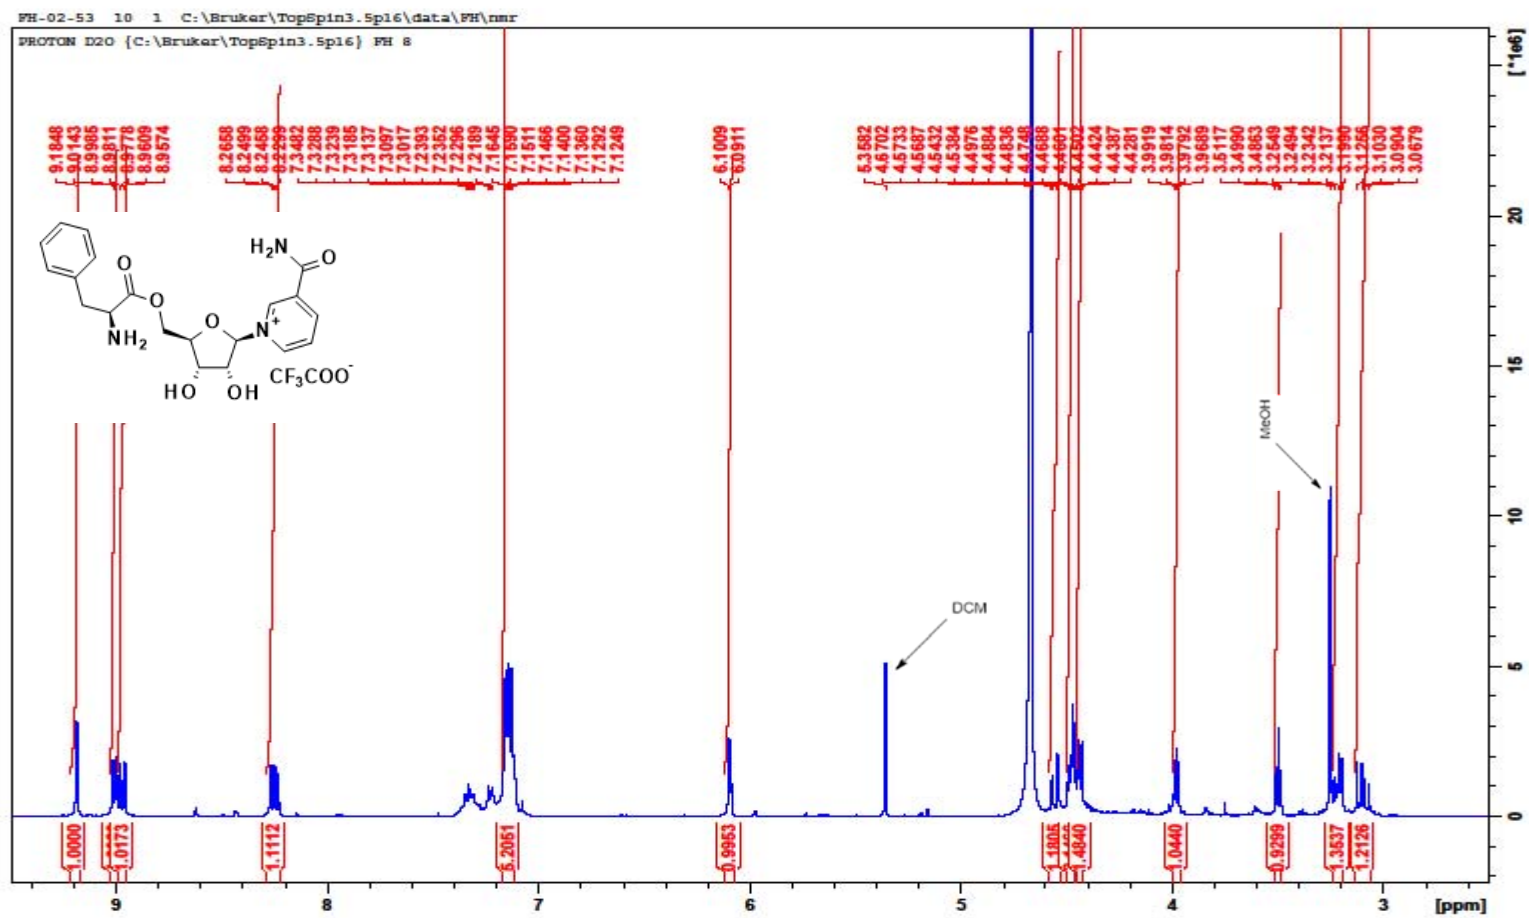

Compound 12e. 400 MHz  $^1\text{H}$  NMR spectrum in  $\text{D}_2\text{O}$

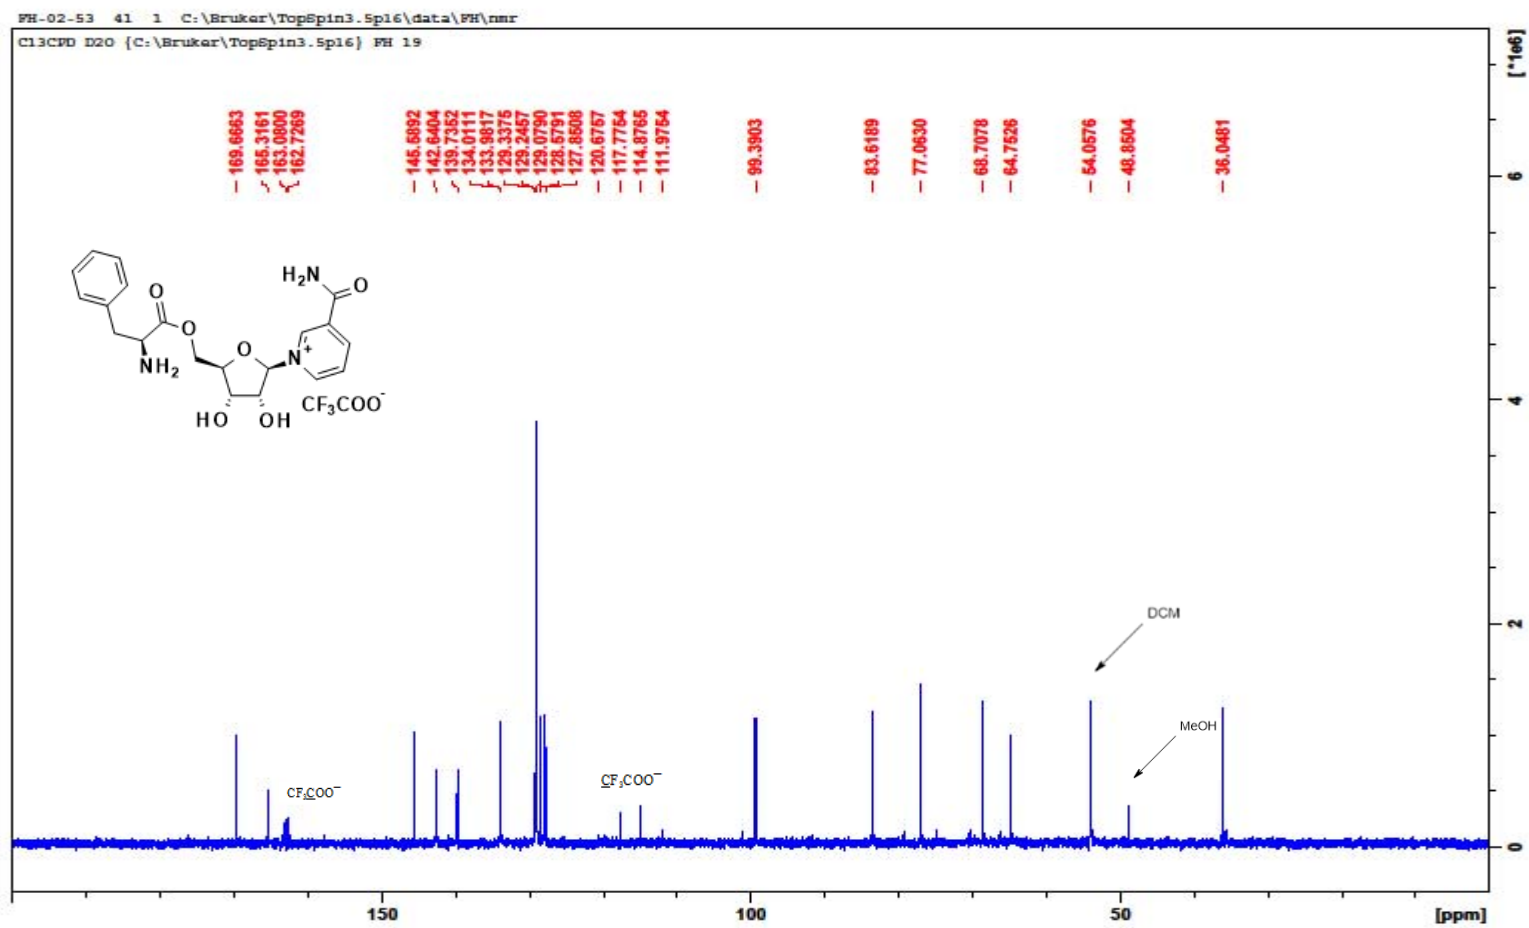

Compound 12e. 100 MHz <sup>13</sup>C NMR spectrum in D<sub>2</sub>O



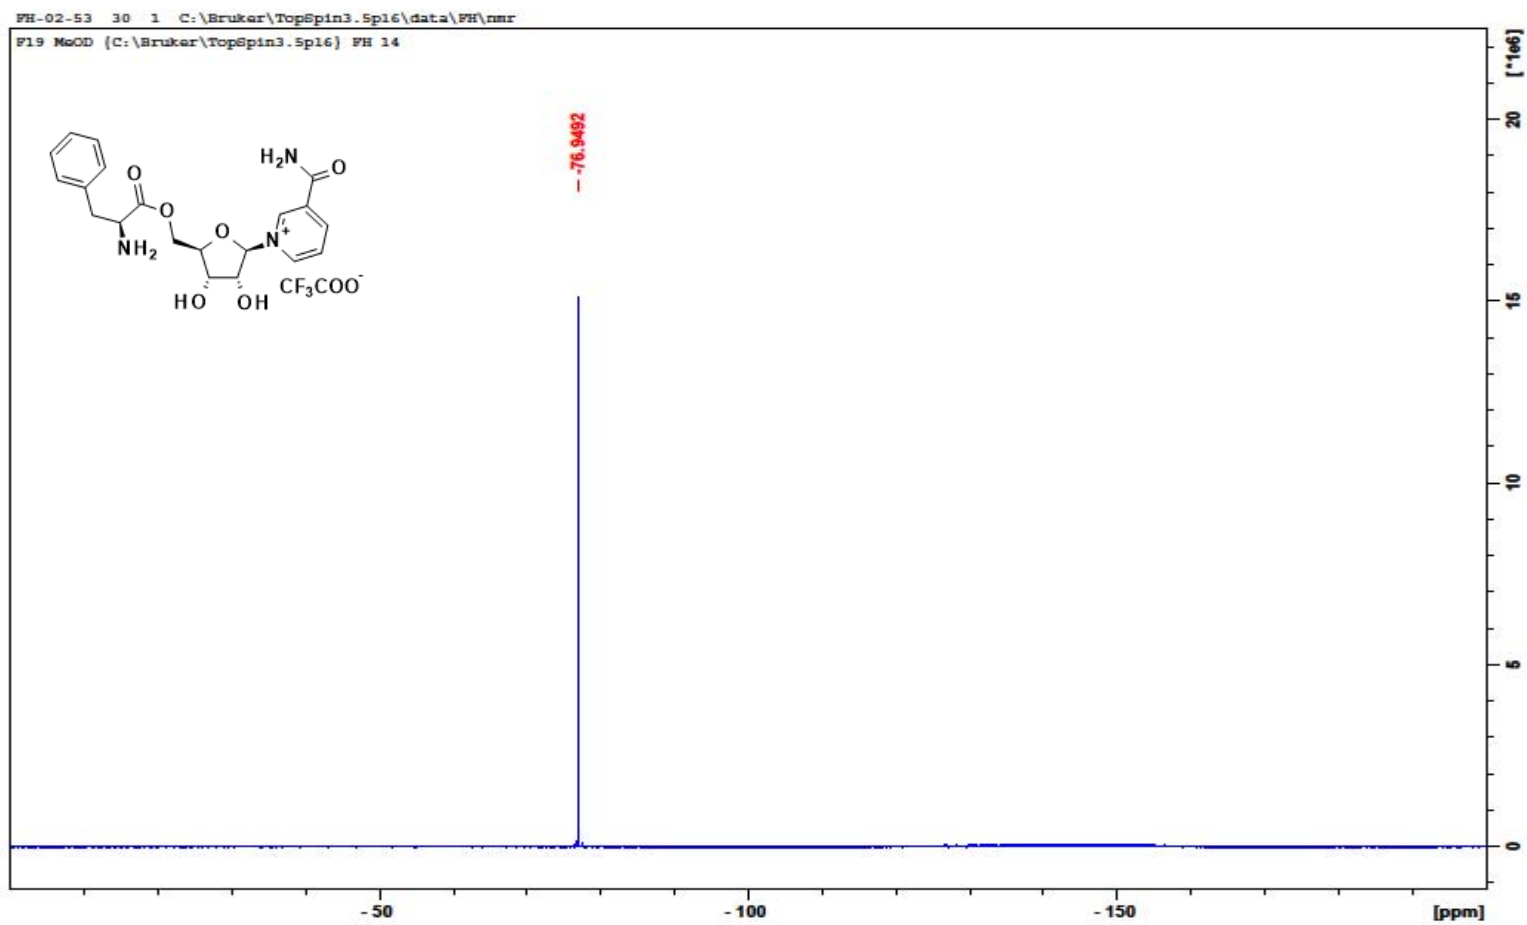

Compound 12e. 377 MHz  $^{19}\text{F}$  NMR spectrum in MeOD

mm\_101618\_nr\_phenylalanine\_01 #13-23 RT: 0.18-0.33 AV: 11 SB: 82 5.77-7.06 NL: 4.94E6  
F: FTMS + p ESI Full ms [200.00-1050.00]

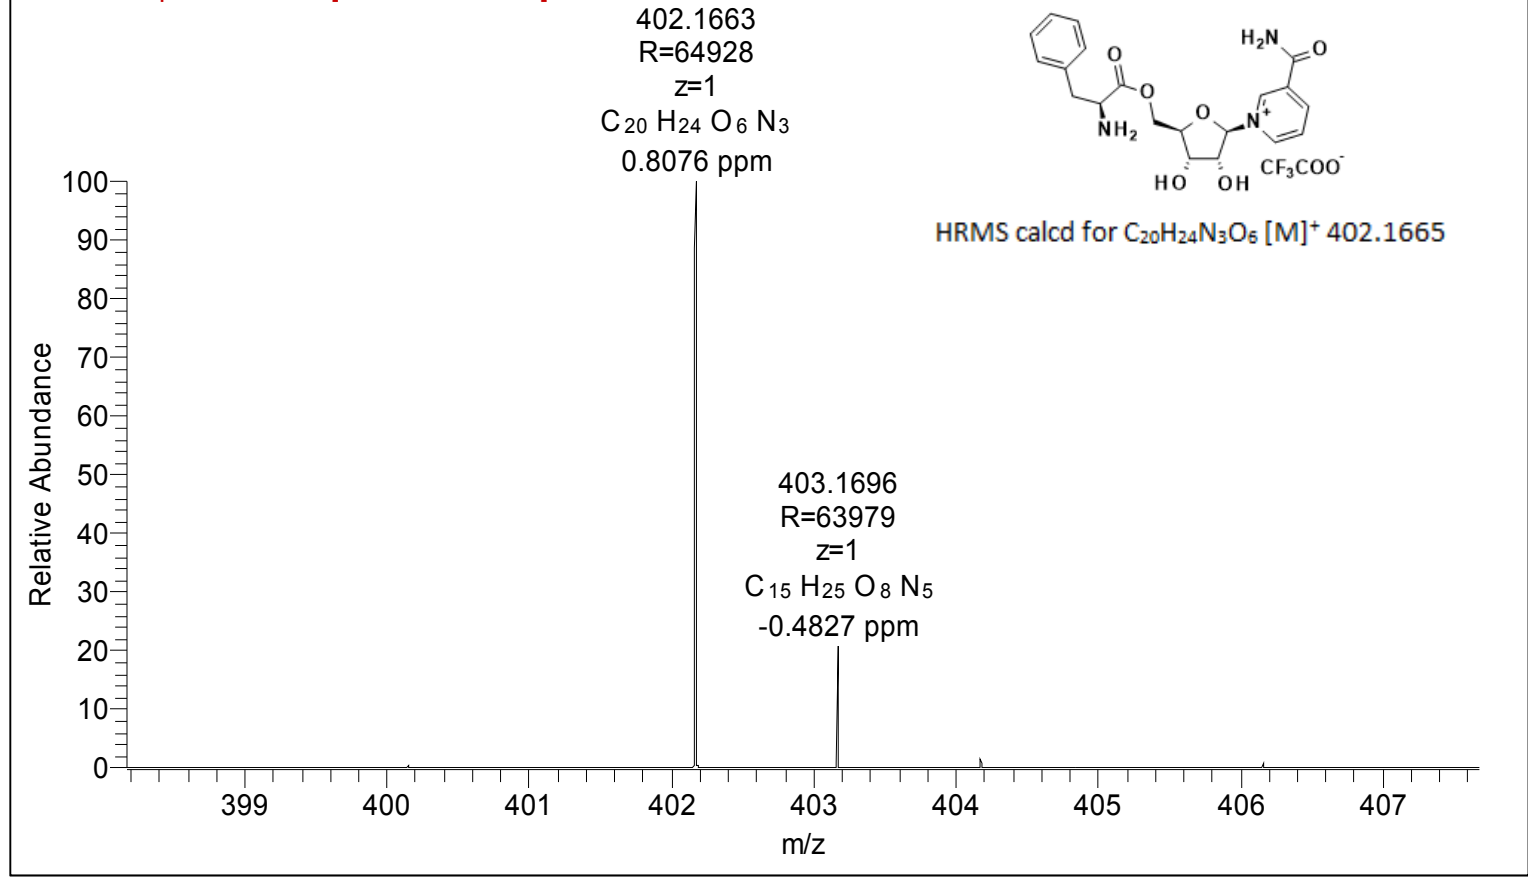

Compound 12e. HRMS spectra

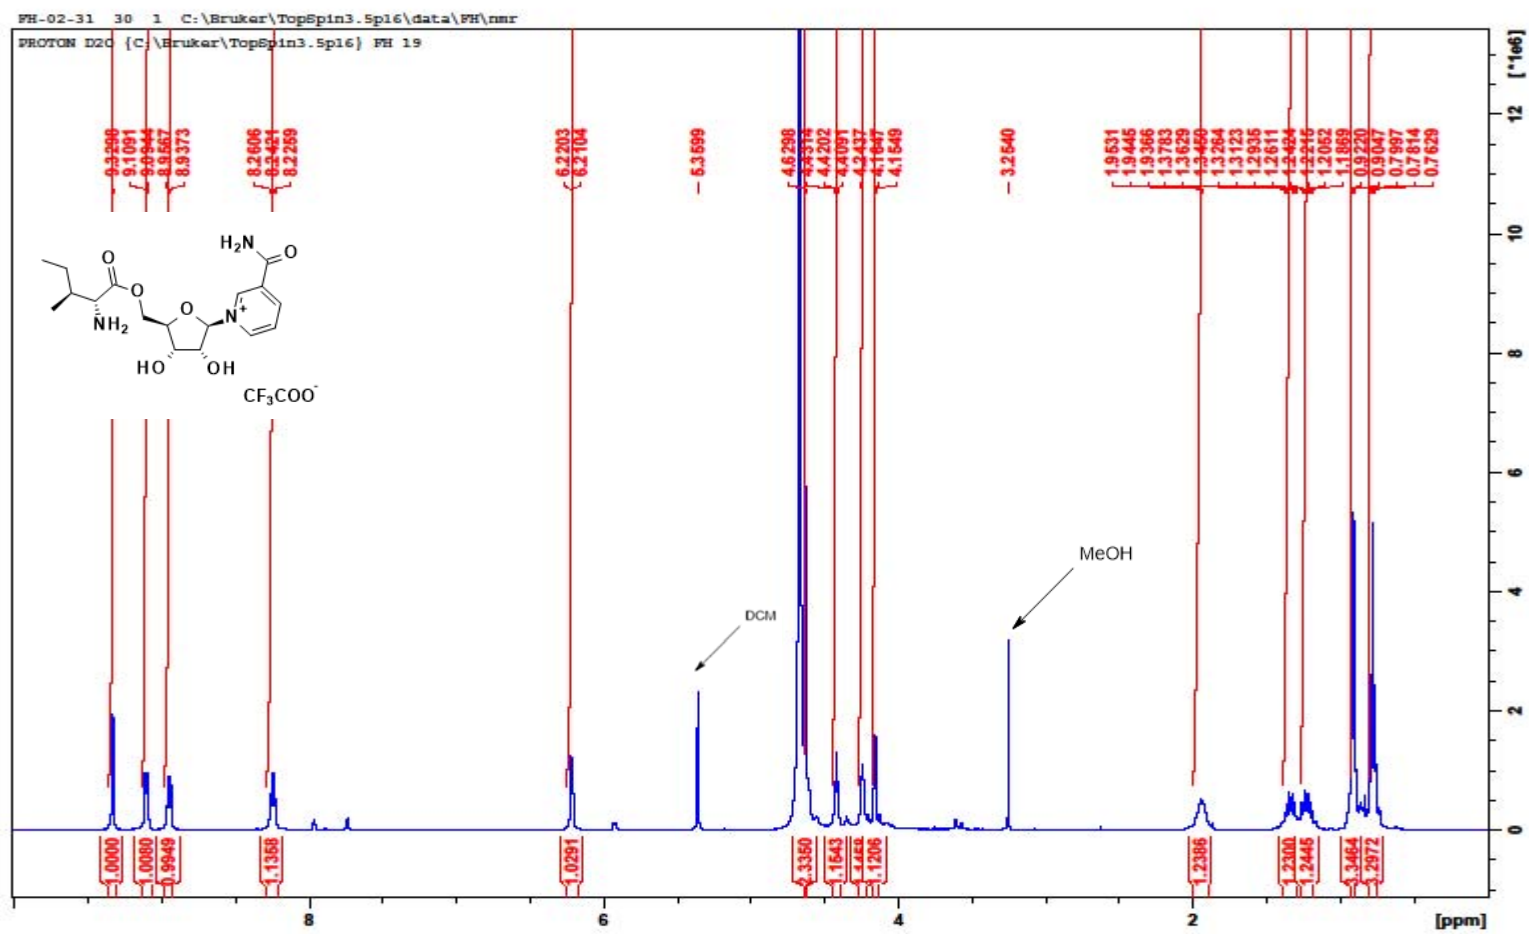

Compound 12f. 400 MHz <sup>1</sup>H NMR spectrum in D<sub>2</sub>O

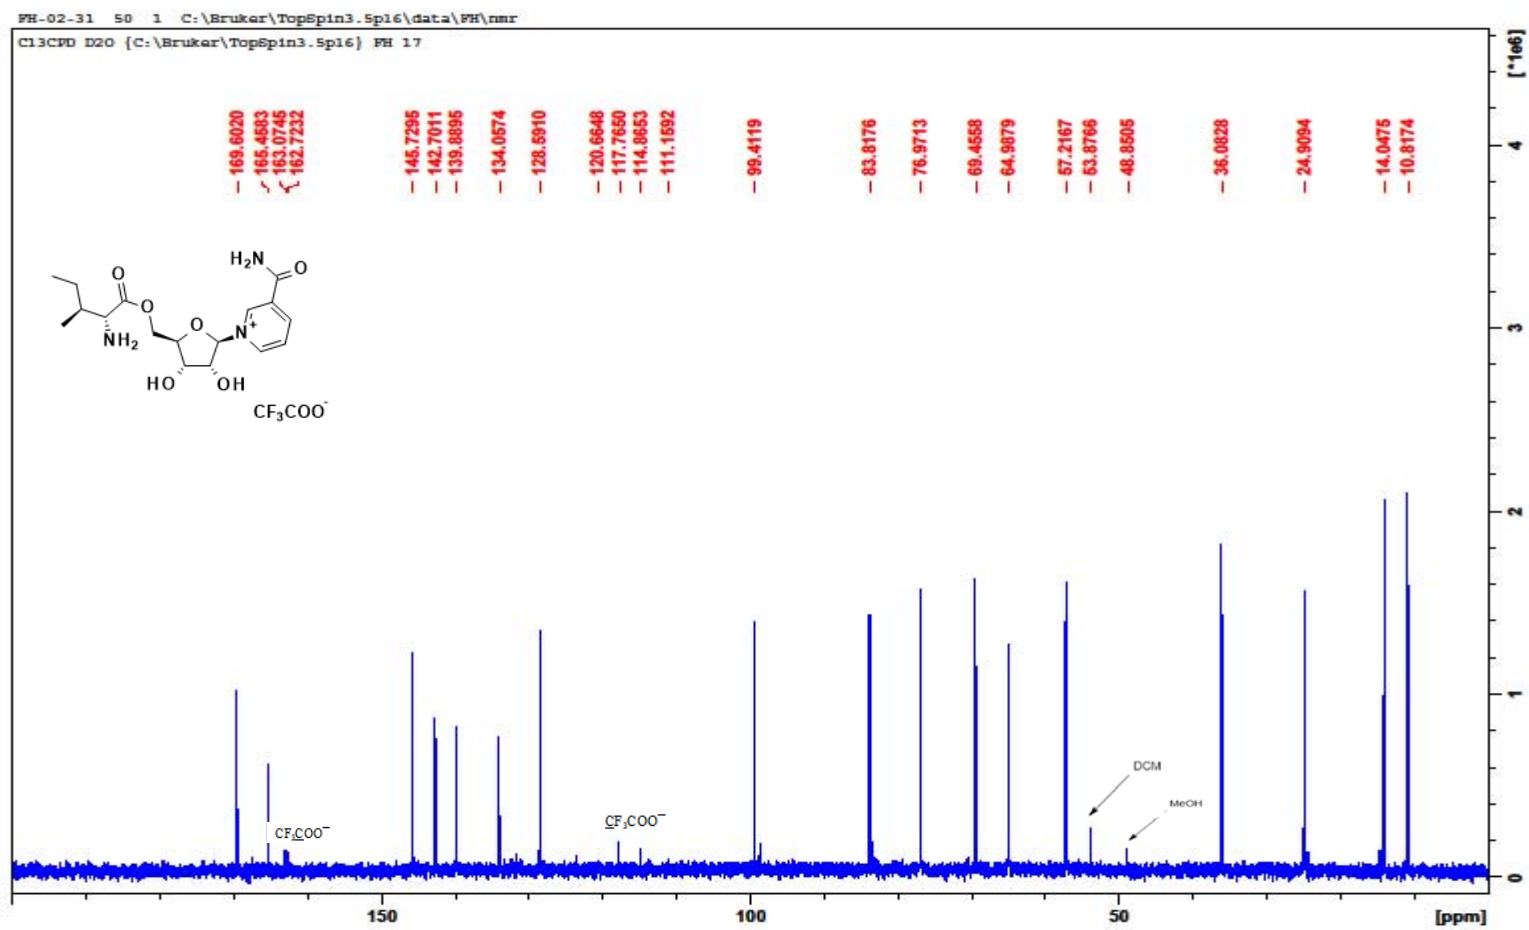

Compound 12f. 100 MHz <sup>13</sup>C NMR spectrum in D<sub>2</sub>O

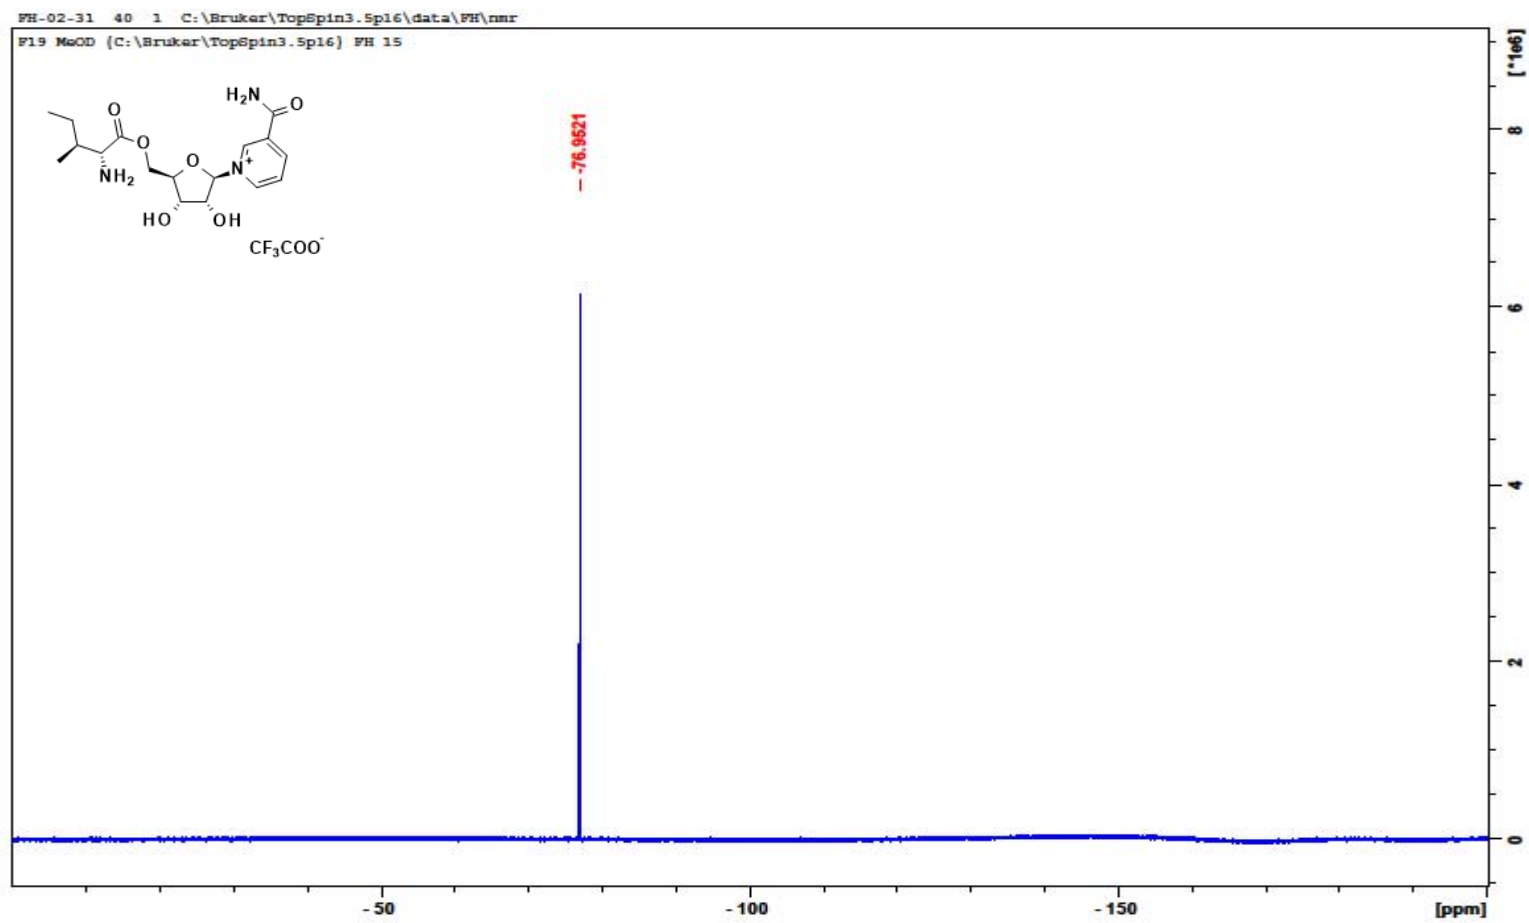

Compound 12f. 377 MHz <sup>19</sup>F NMR spectrum in MeOD

mm\_101618\_nr\_isoleucine\_01 #13-24 RT: 0.18-0.35 AV: 12 SB: 82 5.78-7.07 NL: 4.58E6  
F: FTMS + p ESI Full ms [200.00-1050.00]

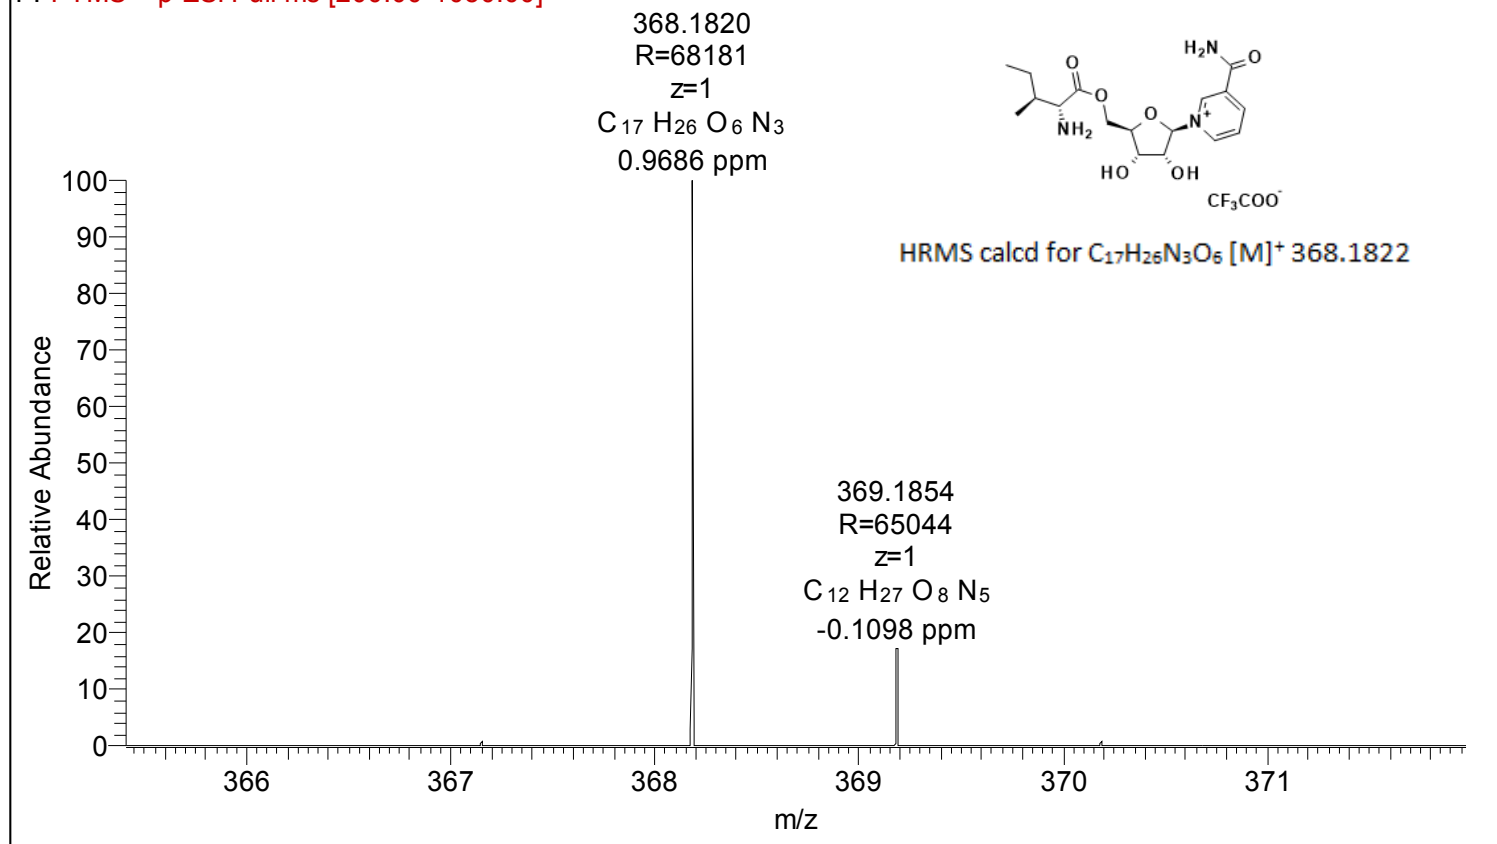

Compound 12f. HRMS spectra

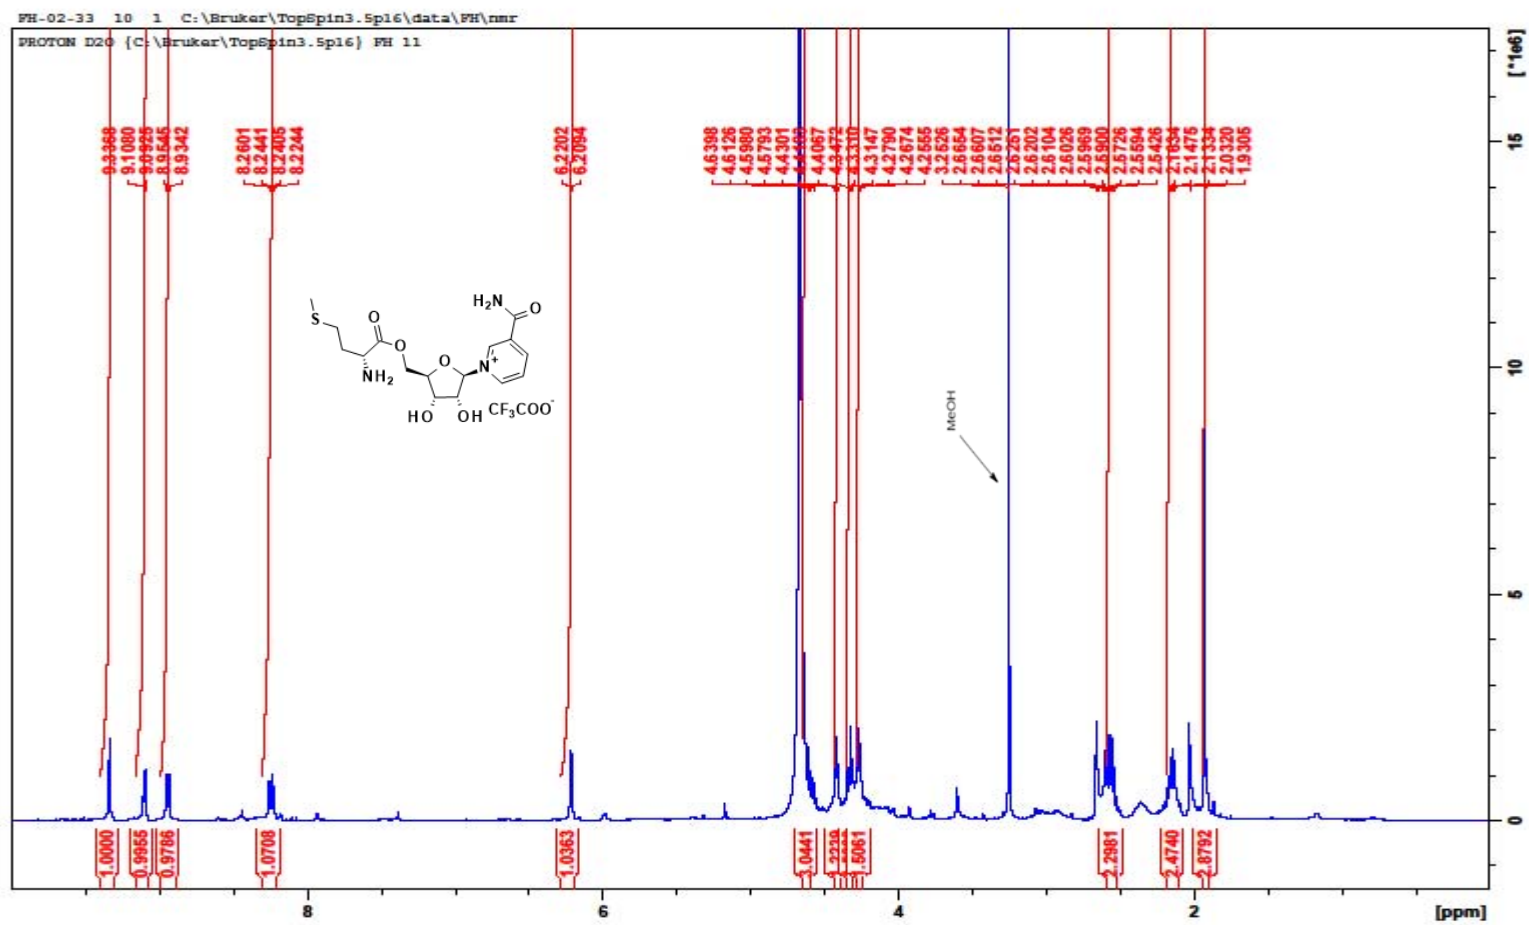

Compound 12g. 400 MHz  $^1\text{H}$  NMR spectrum in  $\text{D}_2\text{O}$

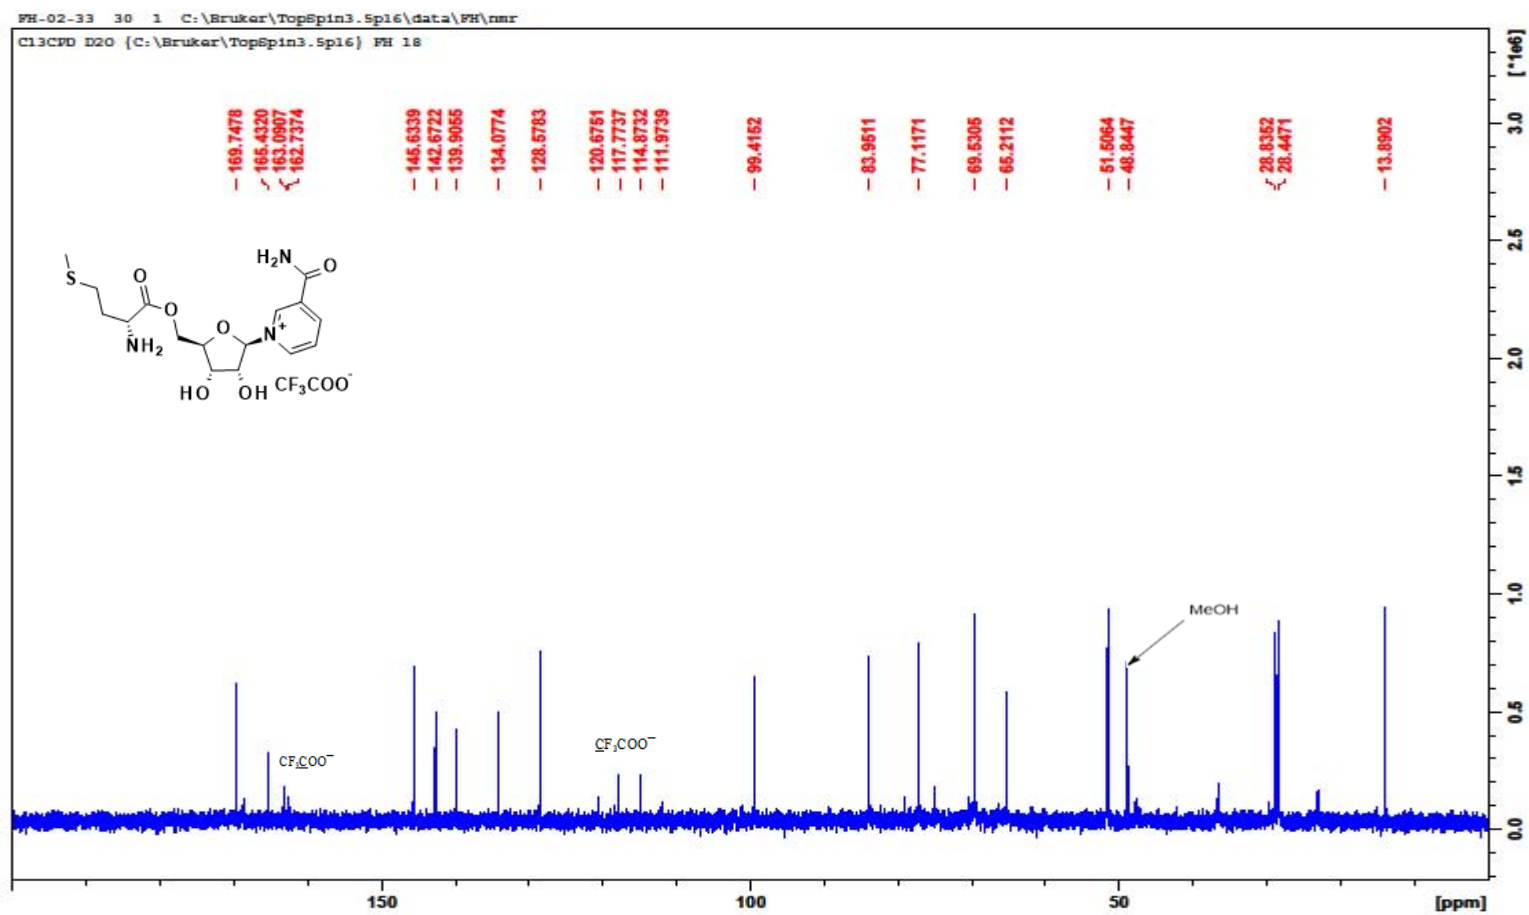

Compound 12g. 100 MHz <sup>13</sup>C NMR spectrum in D<sub>2</sub>O



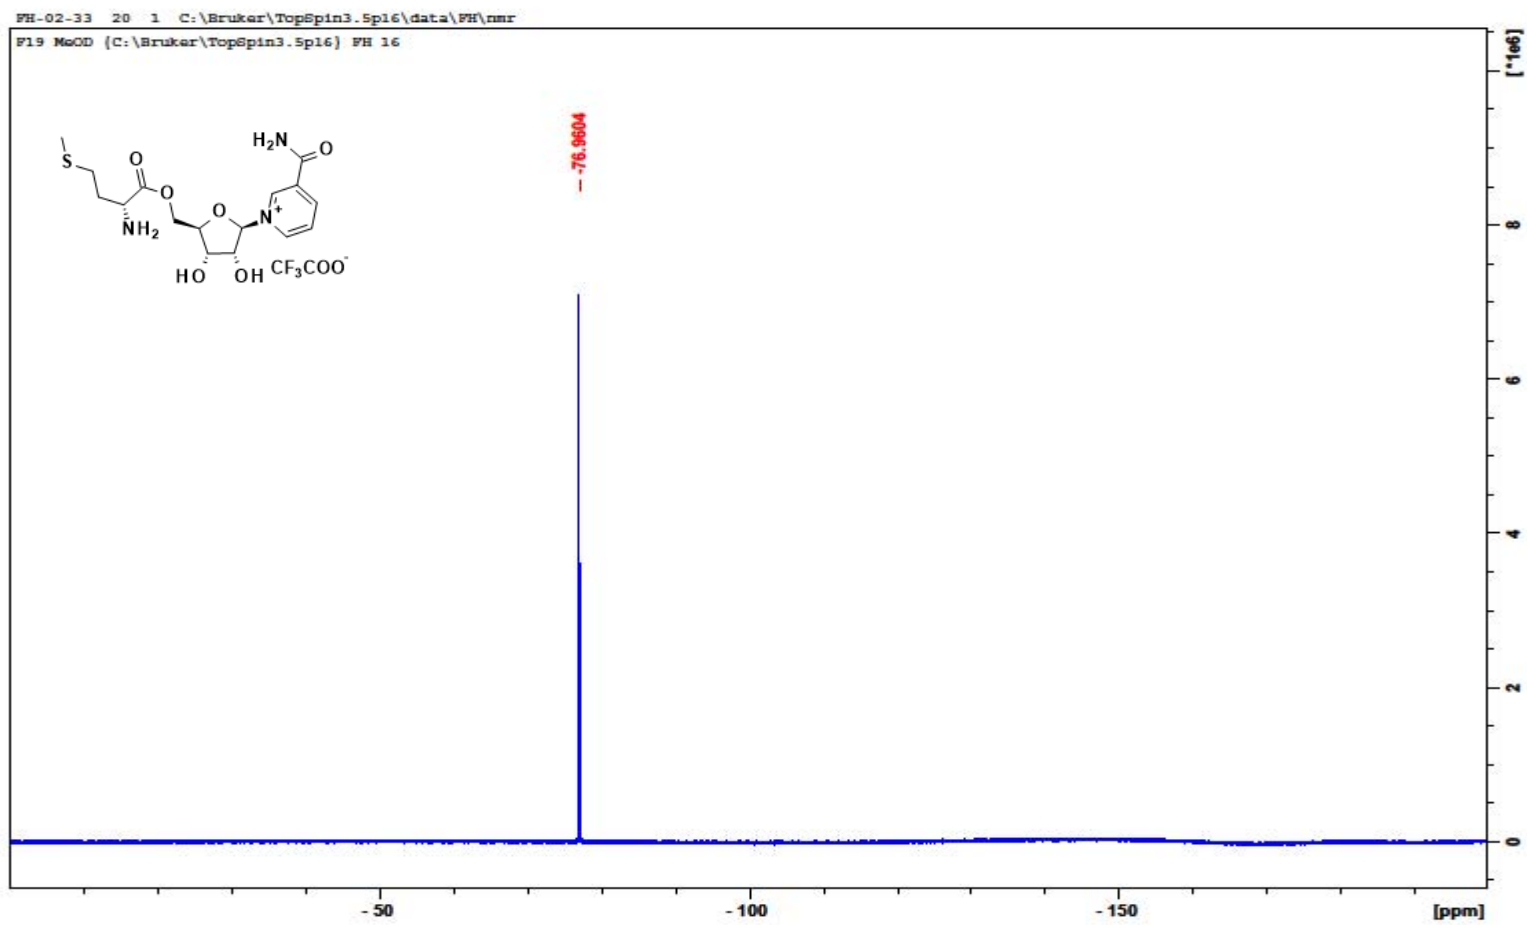

Compound 12g. 377 MHz  $^{19}\text{F}$  NMR spectrum in MeOD

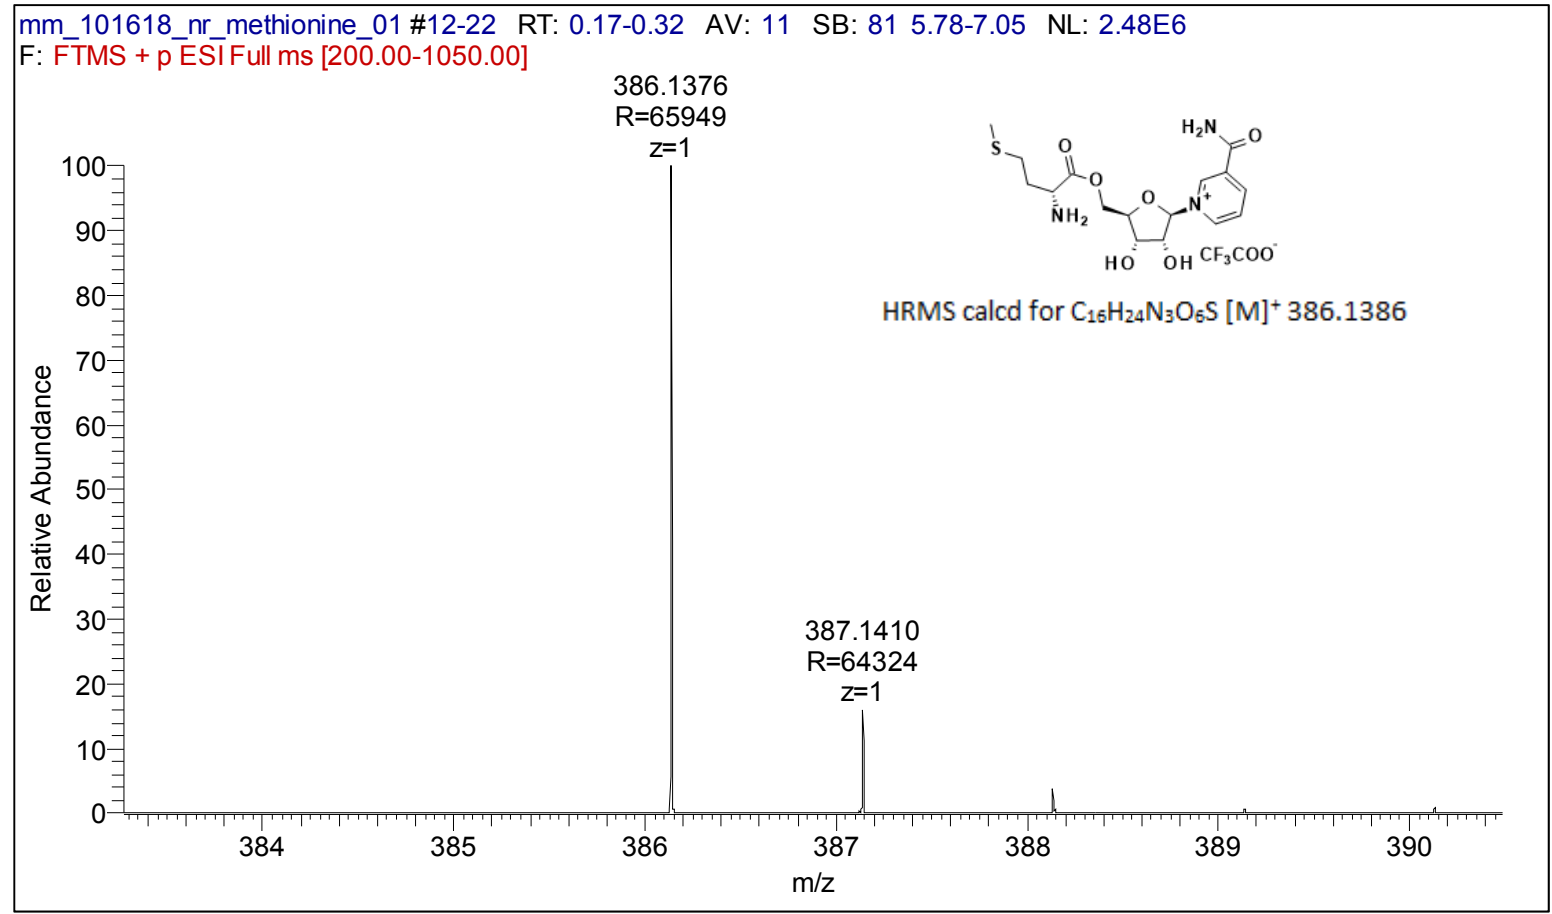

Compound 12g. HRMS spectra

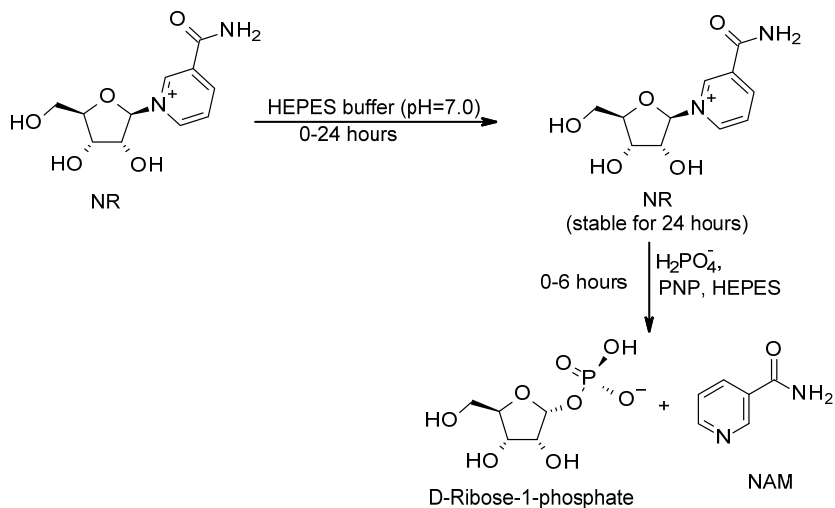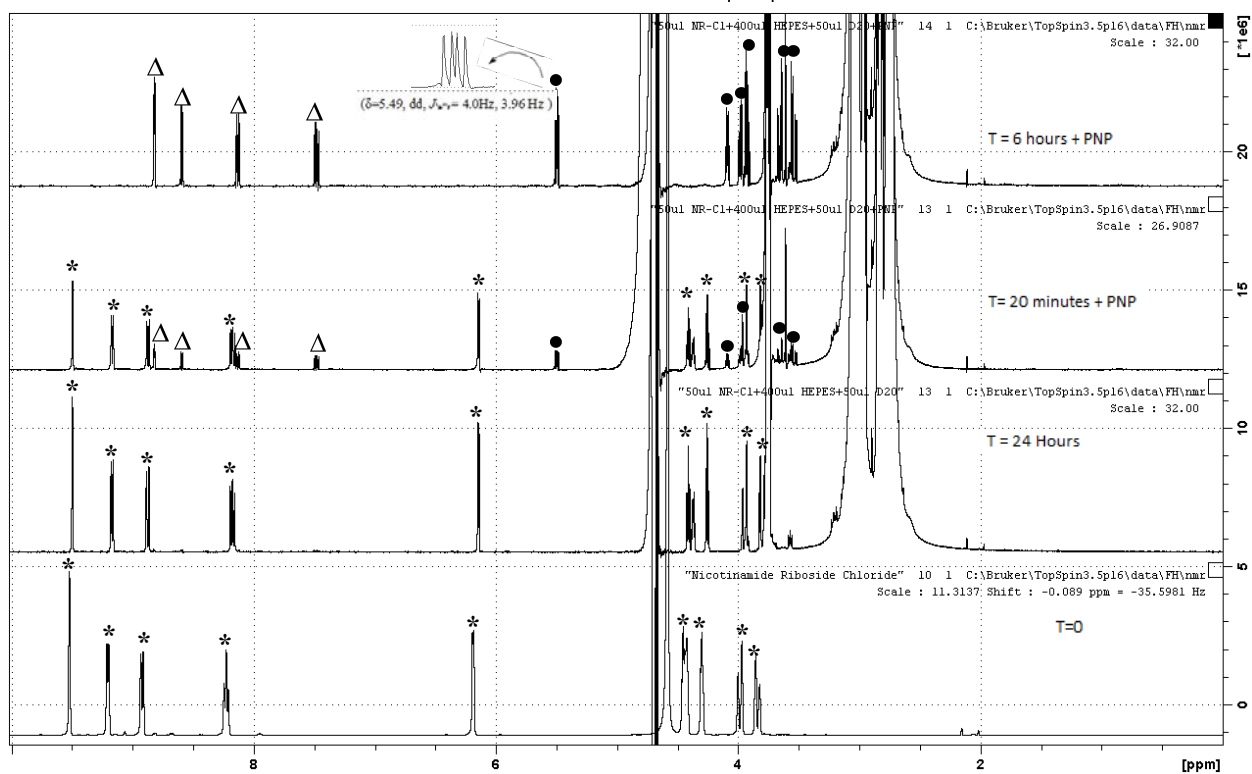

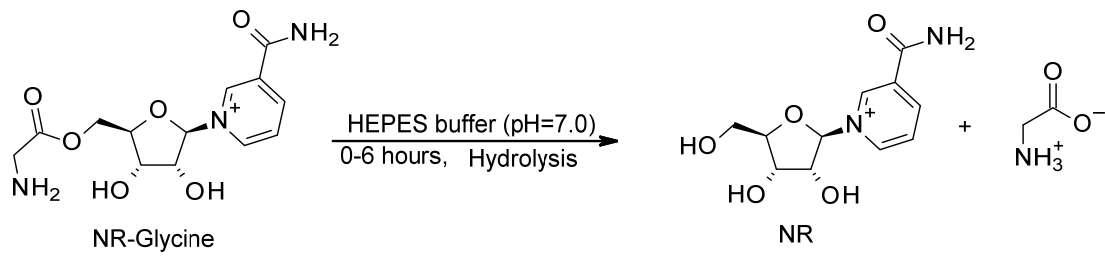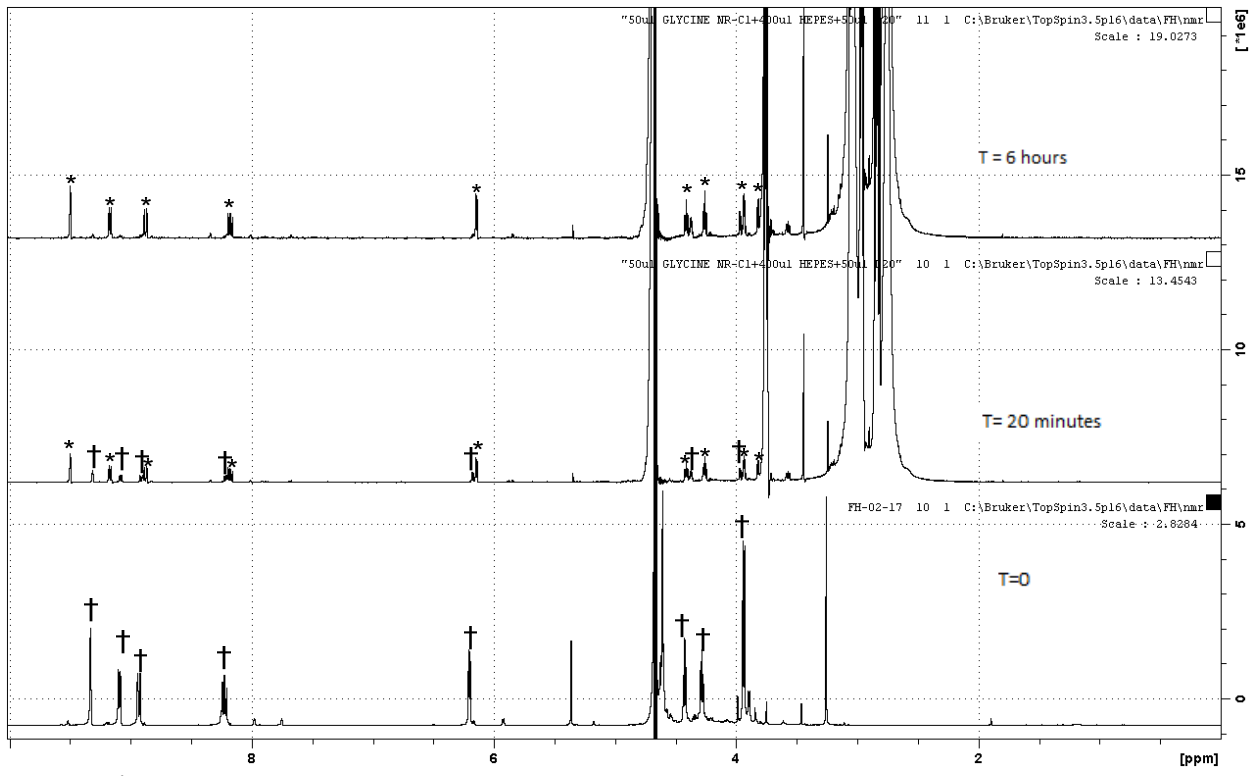

† NR-glycine  
 \* Nicotinamide riboside

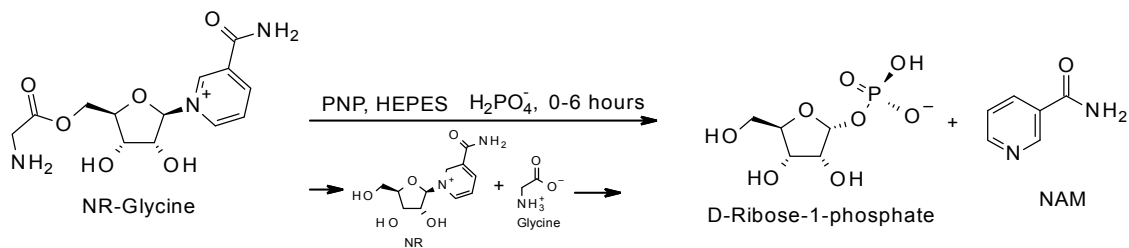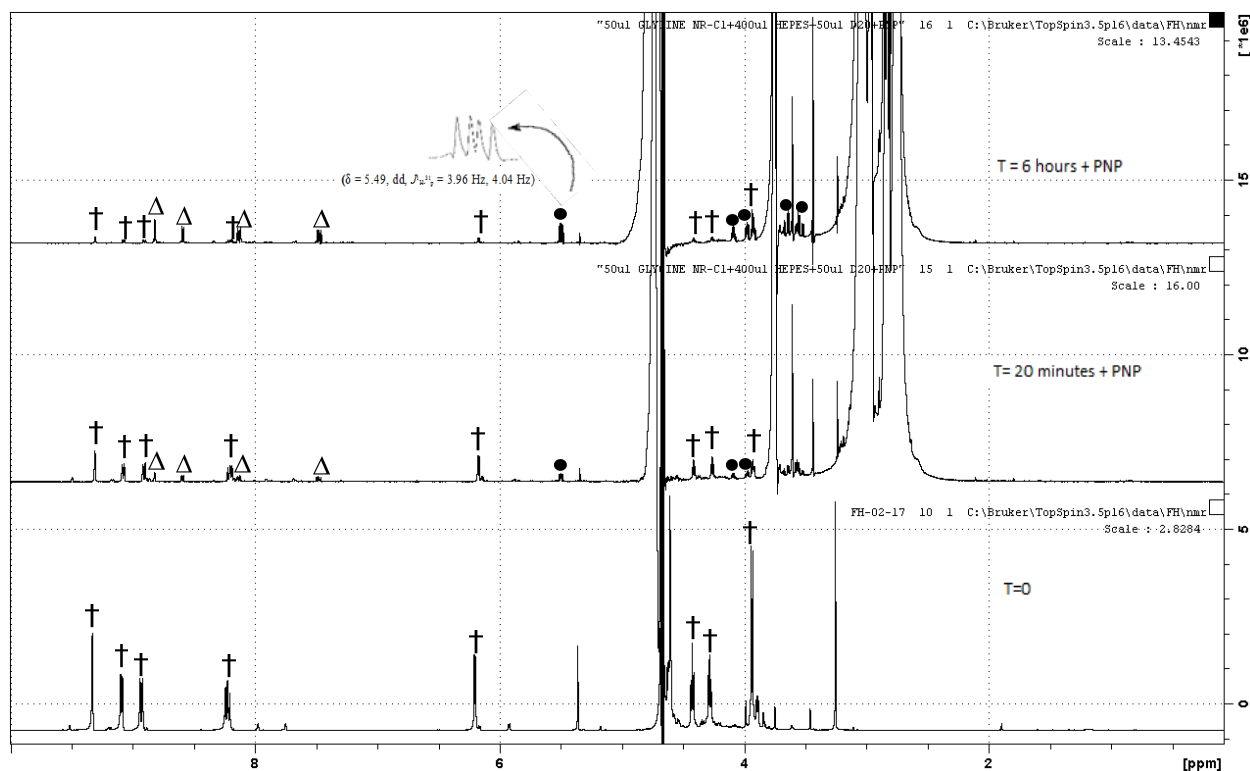

- † NR-glycine
- Δ Nicotinamide
- D-Ribose-1-phosphate

**Detailed PNP enzyme activity assay.** The phosphorolysis of nicotinamide riboside chloride (NR-Cl) and glycine nicotinamide riboside conjugate (Gly-NR) catalyzed by PNP (Purine Nucleoside Phosphorylase) was performed at room temperature and monitored by  $^1\text{H}$  NMR at  $t = 0$ , 20 min and 6 h. All one dimensional spectra were obtained at 300 K on a Bruker Ascend™ 400 MHz ultrashielded spectrometer (Bruker Biospin) operating at 400.13 MHz for protons (9.39 Tesla). TopSpin 3.2 (Bruker BioSpin) was used for all NMR spectral acquisition ( $n_s=128$ ) and pre-processing, and the automation of sample submission was performed using ICON-NMR (Bruker BioSpin). All samples were automatically shimmed, and the spectra acquisition time was 10 minutes 08 seconds ( $n_s=128$ ). Each NMR tube (7inch x 5mm) contained 450  $\mu\text{l}$  HEPES buffer (100.0 mM, pH 7.0) which included 100 mM  $\text{KH}_2\text{PO}_4$ , 5  $\mu\text{l}$  PNP (1mg dissolved in 50 $\mu\text{l}$  HEPES buffer), 50.0  $\mu\text{l}$  NR-Cl and NR glycine conjugate (50.0 mM in 1 mL  $\text{D}_2\text{O}$ ). For each independent experiment used freshly prepared solutions of NR-Cl and NR glycine conjugate in HEPES buffer, containing 100 mM  $\text{KH}_2\text{PO}_4$  (13.6 mg/mL) and 50  $\mu\text{l}$   $\text{D}_2\text{O}$ .

TABLE 1: exploratory conditions for the synthesis of NR amino acid conjugate 5 by ball-milling.

| Entry |  |  | TMSOTf  | Solvent                    | Reaction outcomes <sup>a,b</sup> |
|-------|-----------------------------------------------------------------------------------|-----------------------------------------------------------------------------------|---------|----------------------------|----------------------------------|
| 1     | 1 eqv                                                                             |                                                                                   | 2 eqv   | DCE (1 eqv)                | trace                            |
| 2     |                                                                                   | 1 eqv                                                                             | 2 eqv   | DCE (1eqv)                 | trace                            |
| 3     | 1 eqv                                                                             |                                                                                   | 0.5 eqv | DCM (1 eqv)                | trace                            |
| 4     | 1 eqv                                                                             |                                                                                   | 1 eqv   | CH <sub>3</sub> CN (1 eqv) | trace                            |
| 5     | 1 eqv                                                                             |                                                                                   | 2 eqv   | CH <sub>3</sub> CN (3 eqv) | trace                            |
| 6     | 1 eqv                                                                             |                                                                                   | 3 eqv   | CH <sub>3</sub> CN (5 eqv) | trace                            |

<sup>a</sup> ball-milling (30Hz), 30 minutes; <sup>b</sup> crude <sup>1</sup>H-NMR indicated decomposition of the riboside and formation of trace quantities of the expected product, product formation was confirmed by MS.
